# Supplementary material for: Decoding the anticancer activity of VO-clioquinol compound: the mechanism of action and cell death pathways in human osteosarcoma cells
Source: Royal Society of Chemistry journal article supplement (doi:10.1039/c7mt00068e), 2017-01-01
Supplement: c7mt00068e2.xlsx [file c7mt00068e2.xlsx]

## Sheet: t2t_4A3E70998BF11436362927960
Annotation Database Categories	Biological Term enriched	N proteins in term	%	N proteins in Total	Population Hits	Population Total	p.value	adj.p.value (Benjamini)	Proteins IDs	Fold Enrichment
GOTERM_BP_FAT	GO:0008219~cell death	11	5213270142180090	20	719	13528	1.00923e+08	8.07377e+09	E2F1, BCL10, CASP10, JMJD6, PTK2B, CASP7, PRKCG, BCL2L1, NGFR, MYC, PTEN	1034826147426980
GOTERM_BP_FAT	GO:0016265~death	11	5213270142180090	20	724	13528	1.07869e+08	4.31477e+09	E2F1, BCL10, CASP10, JMJD6, PTK2B, CASP7, PRKCG, BCL2L1, NGFR, MYC, PTEN	1.02768e+16
GOTERM_BP_FAT	GO:0006915~apoptosis	10	4739336492890990	20	602	13528	3.9926e+07	1.06469e+11	E2F1, BCL10, CASP10, JMJD6, PTK2B, CASP7, BCL2L1, NGFR, MYC, PTEN	1.12359e+16
GOTERM_BP_FAT	GO:0012501~programmed cell death	10	4739336492890990	20	611	13528	4.53884e+07	9.07764e+09	E2F1, BCL10, CASP10, JMJD6, PTK2B, CASP7, BCL2L1, NGFR, MYC, PTEN	1.10704e+16
SP_PIR_KEYWORDS	Apoptosis	7	3.31754e+16	20	381	19235	1.26661e+10	1.22854e+11	E2F1, BCL10, CASP10, CASP7, BCL2L1, NGFR, PTEN	1766994750656160
GOTERM_BP_FAT	GO:0043065~positive regulation of apoptosis	8	3.79147e+16	20	430	13528	1.12977e+09	1.80748e+11	BCL10, CASP10, CDKN1A, BCL2L1, NGFR, MYC, PTEN, DDIT3	1.25842e+16
GOTERM_BP_FAT	GO:0043068~positive regulation of programmed cell death	8	3.79147e+16	20	433	13528	1.1837e+10	1.57814e+12	BCL10, CASP10, CDKN1A, BCL2L1, NGFR, MYC, PTEN, DDIT3	1249699769053110
GOTERM_BP_FAT	GO:0010942~positive regulation of cell death	8	3.79147e+16	20	435	13528	1.22084e+10	1.39515e+12	BCL10, CASP10, CDKN1A, BCL2L1, NGFR, MYC, PTEN, DDIT3	1243954022988500
GOTERM_BP_FAT	GO:0006917~induction of apoptosis	6	2843601895734590	20	320	13528	6.35315e+10	0.005631503811566518	BCL10, CASP10, CDKN1A, NGFR, MYC, PTEN	126825
GOTERM_BP_FAT	GO:0012502~induction of programmed cell death	6	2843601895734590	20	321	13528	6.44804e+10	0.005145312716956063	BCL10, CASP10, CDKN1A, NGFR, MYC, PTEN	1.2643e+16
GOTERM_BP_FAT	GO:0042981~regulation of apoptosis	8	3.79147e+16	20	804	13528	6.84063e+10	0.004962816151487748	BCL10, CASP10, CDKN1A, BCL2L1, NGFR, MYC, PTEN, DDIT3	6730348258706460
GOTERM_BP_FAT	GO:0043067~regulation of programmed cell death	8	3.79147e+16	20	812	13528	7.28604e+10	0.004845758064139227	BCL10, CASP10, CDKN1A, BCL2L1, NGFR, MYC, PTEN, DDIT3	6664039408866990
GOTERM_BP_FAT	GO:0010941~regulation of cell death	8	3.79147e+16	20	815	13528	7.45912e+10	0.004579879416871657	BCL10, CASP10, CDKN1A, BCL2L1, NGFR, MYC, PTEN, DDIT3	6639509202453980
GOTERM_BP_FAT	GO:0043066~negative regulation of apoptosis	6	2843601895734590	20	354	13528	1.02486e+12	0.005451302109036549	BCL10, CDKN1A, BCL2L1, NGFR, MYC, PTEN	1.14644e+16
GOTERM_BP_FAT	GO:0043069~negative regulation of programmed cell death	6	2843601895734590	20	359	13528	1.09495e+12	0.0054600957869084255	BCL10, CDKN1A, BCL2L1, NGFR, MYC, PTEN	1.13047e+16
GOTERM_BP_FAT	GO:0060548~negative regulation of cell death	6	2843601895734590	20	360	13528	1.1094e+12	0.005207401164267322	BCL10, CDKN1A, BCL2L1, NGFR, MYC, PTEN	1.12733e+16
GOTERM_BP_FAT	GO:0009628~response to abiotic stimulus	6	2843601895734590	20	368	13528	1.23038e+12	0.005453784113795379	CDKN1A, PTK2B, CASP7, BCL2L1, NGFR, MYC	1.10283e+16
GOTERM_BP_FAT	GO:0042127~regulation of cell proliferation	7	3.31754e+16	20	787	13528	5.36196e+10	0.017719127874236462	CDKN1A, KAT2B, PTK2B, BCL2L1, NGFR, MYC, PTEN	6016264294790340
GOTERM_BP_FAT	GO:0008284~positive regulation of cell proliferation	5	2.36967e+16	20	414	13528	0.0023255285788883516	0.05654434942705766	CDKN1A, PTK2B, BCL2L1, NGFR, MYC	8169082125603860
INTERPRO	IPR011029:DEATH-like	3	1.4218e+16	19	67	16659	0.0023387082535844396	0.14718992926104513	BCL10, CASP10, NGFR	3925923016496460
GOTERM_BP_FAT	GO:0006916~anti-apoptosis	3	1.4218e+16	20	206	13528	0.03328966543125001	0.2842211225987794	BCL2L1, NGFR, MYC	9850485436893200
GOTERM_CC_FAT	GO:0016021~integral to membrane	3	1.4218e+16	18	5297	12782	0.9985491274820472	0.9999999999999976	BCL10, BCL2L1, NGFR	0.4021773330816185
GOTERM_CC_FAT	GO:0031224~intrinsic to membrane	3	1.4218e+16	18	5485	12782	0.9990048606506904	0.9999999999999981	BCL10, BCL2L1, NGFR	0.38839258584017017
GOTERM_BP_FAT	GO:0009628~response to abiotic stimulus	6	2843601895734590	20	368	13528	1.23038e+12	0.005453784113795379	CDKN1A, PTK2B, CASP7, BCL2L1, NGFR, MYC	1.10283e+16
GOTERM_BP_FAT	GO:0001836~release of cytochrome c from mitochondria	3	1.4218e+16	20	21	13528	3.86275e+11	0.013950848111380143	CASP7, BCL2L1, MYC	9662857142857140
GOTERM_BP_FAT	GO:0008637~apoptotic mitochondrial changes	3	1.4218e+16	20	31	13528	8.48192e+11	0.02482883662012192	CASP7, BCL2L1, MYC	6545806451612900
GOTERM_BP_FAT	GO:0009314~response to radiation	4	1.89573e+16	20	200	13528	0.002590216000714825	0.060938756390084725	CDKN1A, CASP7, BCL2L1, MYC	1.3528e+16
GOTERM_BP_FAT	GO:0007005~mitochondrion organization	3	1.4218e+16	20	138	13528	0.01576963357236072	0.18277844736156468	CASP7, BCL2L1, MYC	1.47043e+16
GOTERM_BP_FAT	GO:0010243~response to organic nitrogen	4	1.89573e+16	20	63	13528	8.84406e+09	0.005041224759032237	CDKN1A, PTK2B, BCL2L1, DDIT3	4294603174603170
GOTERM_BP_FAT	GO:0010035~response to inorganic substance	5	2.36967e+16	20	205	13528	1.66034e+12	0.00696711589813781	CDKN1A, PTK2B, BCL2L1, PTEN, DDIT3	1.64976e+16
GOTERM_BP_FAT	GO:0009719~response to endogenous stimulus	6	2843601895734590	20	405	13528	1.92794e+12	0.007682856485457079	CDKN1A, KAT2B, PTK2B, BCL2L1, PTEN, DDIT3	1002074074074070
GOTERM_BP_FAT	GO:0042542~response to hydrogen peroxide	3	1.4218e+16	20	56	13528	0.00275092929896981	0.06276098374667638	PTK2B, BCL2L1, DDIT3	3623571428571420
GOTERM_BP_FAT	GO:0042592~homeostatic process	6	2843601895734590	20	751	13528	0.0031516063098085073	0.06774257063663935	JMJD6, PTK2B, BCL2L1, MYC, DDIT3, PRKCB	5403994673768300
GOTERM_BP_FAT	GO:0019725~cellular homeostasis	5	2.36967e+16	20	466	13528	0.0035688693838206503	0.07250556453582002	PTK2B, BCL2L1, MYC, DDIT3, PRKCB	7257510729613730
GOTERM_BP_FAT	GO:0000302~response to reactive oxygen species	3	1.4218e+16	20	75	13528	0.00487895613202767	0.09101995561594889	PTK2B, BCL2L1, DDIT3	2.7056e+16
GOTERM_BP_FAT	GO:0006979~response to oxidative stress	3	1.4218e+16	20	164	13528	0.021820353366045014	0.22569589814256574	PTK2B, BCL2L1, DDIT3	1.23732e+16
KEGG_PATHWAY	hsa05214:Glioma	5	2.36967e+16	18	63	5085	4.51357e+11	0.0025244648851078244	E2F1, CDKN1A, PRKCG, PTEN, PRKCB	2242063492063490
GOTERM_BP_FAT	GO:0051726~regulation of cell cycle	5	2.36967e+16	20	331	13528	0.0010197805060095906	0.027753815111584035	E2F1, CDKN1A, NGFR, MYC, PTEN	1.02175e+16
KEGG_PATHWAY	hsa05218:Melanoma	3	1.4218e+16	18	71	5085	0.022834719782927674	0.11094599945659722	E2F1, CDKN1A, PTEN	1193661971830980
KEGG_PATHWAY	hsa05215:Prostate cancer	3	1.4218e+16	18	89	5085	0.034741309939595254	0.12366554205754465	E2F1, CDKN1A, PTEN	9522471910112350
GOTERM_BP_FAT	GO:0010033~response to organic substance	9	4265402843601890	20	721	13528	2.80096e+08	2.80057e+12	BCL10, CDKN1A, KAT2B, PTK2B, BCL2L1, MYC, PTEN, DDIT3, PLA2G5	8443273231622740
GOTERM_BP_FAT	GO:0010243~response to organic nitrogen	4	1.89573e+16	20	63	13528	8.84406e+09	0.005041224759032237	CDKN1A, PTK2B, BCL2L1, DDIT3	4294603174603170
GOTERM_BP_FAT	GO:0010035~response to inorganic substance	5	2.36967e+16	20	205	13528	1.66034e+12	0.00696711589813781	CDKN1A, PTK2B, BCL2L1, PTEN, DDIT3	1.64976e+16
GOTERM_BP_FAT	GO:0009719~response to endogenous stimulus	6	2843601895734590	20	405	13528	1.92794e+12	0.007682856485457079	CDKN1A, KAT2B, PTK2B, BCL2L1, PTEN, DDIT3	1002074074074070
GOTERM_BP_FAT	GO:0042127~regulation of cell proliferation	7	3.31754e+16	20	787	13528	5.36196e+10	0.017719127874236462	CDKN1A, KAT2B, PTK2B, BCL2L1, NGFR, MYC, PTEN	6016264294790340
GOTERM_BP_FAT	GO:0014070~response to organic cyclic substance	4	1.89573e+16	20	121	13528	6.09181e+11	0.019310857400576475	CDKN1A, PTK2B, BCL2L1, PTEN	223603305785124
GOTERM_BP_FAT	GO:0045768~positive regulation of anti-apoptosis	3	1.4218e+16	20	30	13528	7.94134e+10	0.02414825484172789	CDKN1A, PTK2B, BCL2L1	67.64
GOTERM_BP_FAT	GO:0045767~regulation of anti-apoptosis	3	1.4218e+16	20	38	13528	0.0012748297075257287	0.033445068550106094	CDKN1A, PTK2B, BCL2L1	53.4
GOTERM_BP_FAT	GO:0009725~response to hormone stimulus	5	2.36967e+16	20	367	13528	0.0014950285848773894	0.03787437713912467	CDKN1A, KAT2B, PTK2B, BCL2L1, PTEN	9215258855585830
GOTERM_BP_FAT	GO:0008284~positive regulation of cell proliferation	5	2.36967e+16	20	414	13528	0.0023255285788883516	0.05654434942705766	CDKN1A, PTK2B, BCL2L1, NGFR, MYC	8169082125603860
GOTERM_BP_FAT	GO:0042493~response to drug	4	1.89573e+16	20	216	13528	0.0032205402700913707	0.0673690169124267	CDKN1A, PTK2B, PTEN, DDIT3	1.25259e+16
GOTERM_BP_FAT	GO:0010038~response to metal ion	3	1.4218e+16	20	129	13528	0.013876365339402954	0.1839270444592268	PTK2B, BCL2L1, PTEN	1.57302e+16
GOTERM_BP_FAT	GO:0070482~response to oxygen levels	3	1.4218e+16	20	141	13528	0.016424220084529127	0.18698637507585358	CDKN1A, PTK2B, BCL2L1	1.43915e+16
GOTERM_BP_FAT	GO:0042325~regulation of phosphorylation	4	1.89573e+16	20	466	13528	0.026105965640799922	0.25165668624074267	BCL10, CDKN1A, PTK2B, PTEN	5806008583690980
GOTERM_BP_FAT	GO:0019220~regulation of phosphate metabolic process	4	1.89573e+16	20	485	13528	0.028947564218654492	0.2689923177249024	BCL10, CDKN1A, PTK2B, PTEN	5578556701030920
GOTERM_BP_FAT	GO:0051174~regulation of phosphorus metabolic process	4	1.89573e+16	20	485	13528	0.028947564218654492	0.2689923177249024	BCL10, CDKN1A, PTK2B, PTEN	5578556701030920
GOTERM_BP_FAT	GO:0009991~response to extracellular stimulus	3	1.4218e+16	20	220	13528	0.03754187539609192	0.30540470415333554	CDKN1A, PTEN, DDIT3	9223636363636360
GOTERM_BP_FAT	GO:0010627~regulation of protein kinase cascade	3	1.4218e+16	20	249	13528	0.04697589975971462	0.3449146682537788	BCL10, PTK2B, PTEN	8149397590361440
GOTERM_BP_FAT	GO:0045859~regulation of protein kinase activity	3	1.4218e+16	20	345	13528	0.08341078806354973	0.4949535707059909	CDKN1A, PTK2B, PTEN	5881739130434780
GOTERM_BP_FAT	GO:0043549~regulation of kinase activity	3	1.4218e+16	20	357	13528	0.08844638524671825	0.5128879484266107	CDKN1A, PTK2B, PTEN	5.68403e+16
GOTERM_BP_FAT	GO:0008285~negative regulation of cell proliferation	3	1.4218e+16	20	361	13528	0.09014563698122154	0.5164970900140371	CDKN1A, KAT2B, PTEN	5621052631578940
GOTERM_BP_FAT	GO:0051338~regulation of transferase activity	3	1.4218e+16	20	372	13528	0.09487021764561697	0.5320731738617488	CDKN1A, PTK2B, PTEN	5454838709677410
SP_PIR_KEYWORDS	cytoplasm	7	3.31754e+16	20	3332	19235	0.09576484088219875	0.5567916855102094	BCL10, CDKN1A, PTK2B, CASP7, MAPT, PTEN, PRKCB	2.02048e+16
GOTERM_BP_FAT	GO:0007166~cell surface receptor linked signal transduction	5	2.36967e+16	20	1856	13528	0.2583647212052099	0.8659304074824912	BCL10, PTK2, JMJD6, PTK2B, PTEN	1822198275862060
KEGG_PATHWAY	hsa05200:Pathways in cancer	8	3.79147e+16	18	328	5085	4.82545e+09	0.0013502464909546097	E2F1, CDKN1A, PTK2, PRKCG, BCL2L1, MYC, PTEN, PRKCB	6890243902439020
KEGG_PATHWAY	hsa05222:Small cell lung cancer	5	2.36967e+16	18	84	5085	1.40016e+11	0.0026104020257256	E2F1, PTK2, BCL2L1, MYC, PTEN	1681547619047610
KEGG_PATHWAY	hsa05220:Chronic myeloid leukemia	4	1.89573e+16	18	75	5085	0.001806332675409072	0.01673277550906782	E2F1, CDKN1A, BCL2L1, MYC	1.50667e+16
KEGG_PATHWAY	hsa04510:Focal adhesion	4	1.89573e+16	18	201	5085	0.02747447927288031	0.11308651130111957	PTK2, PRKCG, PTEN, PRKCB	5621890547263680
GOTERM_BP_FAT	GO:0010605~negative regulation of macromolecule metabolic process	4	1.89573e+16	20	734	13528	0.08069215654504651	0.48986194269608807	E2F1, PRKCG, BCL2L1, MYC	3.6861e+16
GOTERM_BP_FAT	GO:0010629~negative regulation of gene expression	3	1.4218e+16	20	504	13528	0.15644950706661911	0.6969730267061031	E2F1, BCL2L1, MYC	4026190476190470
GOTERM_BP_FAT	GO:0050877~neurological system process	4	1.89573e+16	20	1210	13528	0.23851891770502973	0.8448214893062649	PTK2, PRKCG, MYC, PTEN	2.23603e+16
GOTERM_BP_FAT	GO:0051129~negative regulation of cellular component organization	4	1.89573e+16	20	142	13528	9.70007e+11	0.027347035976785672	PTK2, MAPT, NGFR, PTEN	1.90535e+16
GOTERM_BP_FAT	GO:0050770~regulation of axonogenesis	3	1.4218e+16	20	57	13528	0.0028485807963853434	0.06312305196252777	PTK2, MAPT, NGFR	35.6
GOTERM_BP_FAT	GO:0010975~regulation of neuron projection development	3	1.4218e+16	20	70	13528	0.004263780270684554	0.08391777296343483	PTK2, MAPT, NGFR	2898857142857140
GOTERM_BP_FAT	GO:0010769~regulation of cell morphogenesis involved in differentiation	3	1.4218e+16	20	77	13528	0.005135856476347234	0.09135157352474566	PTK2, MAPT, NGFR	2635324675324670
GOTERM_BP_FAT	GO:0031344~regulation of cell projection organization	3	1.4218e+16	20	89	13528	0.006805039185990679	0.1119729075350494	PTK2, MAPT, NGFR	22.8
GOTERM_BP_FAT	GO:0022604~regulation of cell morphogenesis	3	1.4218e+16	20	131	13528	0.014287867757308998	0.18288697691251143	PTK2, MAPT, NGFR	1549007633587780
GOTERM_BP_FAT	GO:0045664~regulation of neuron differentiation	3	1.4218e+16	20	133	13528	0.014704665639898275	0.1792346432728974	PTK2, MAPT, NGFR	1.52571e+16
GOTERM_BP_FAT	GO:0050767~regulation of neurogenesis	3	1.4218e+16	20	166	13528	0.022320323872261367	0.2218323158973471	PTK2, MAPT, NGFR	1.22241e+16
GOTERM_BP_FAT	GO:0051960~regulation of nervous system development	3	1.4218e+16	20	192	13528	0.029245983122232068	0.26834334141624594	PTK2, MAPT, NGFR	1056875
GOTERM_BP_FAT	GO:0060284~regulation of cell development	3	1.4218e+16	20	205	13528	0.03299381054500125	0.2880522197658433	PTK2, MAPT, NGFR	9898536585365850
GOTERM_CC_FAT	GO:0044459~plasma membrane part	6	2843601895734590	18	2203	12782	0.15513637234323635	0.6621773025854137	BCL10, PTK2, PTK2B, MAPT, BCL2L1, NGFR	1934029353911330
GOTERM_BP_FAT	GO:0051129~negative regulation of cellular component organization	4	1.89573e+16	20	142	13528	9.70007e+11	0.027347035976785672	PTK2, MAPT, NGFR, PTEN	1.90535e+16
GOTERM_BP_FAT	GO:0044087~regulation of cellular component biogenesis	3	1.4218e+16	20	142	13528	0.01664499456242127	0.18664335615380845	PTK2, MAPT, PTEN	1.42901e+16
GOTERM_MF_FAT	GO:0019904~protein domain specific binding	3	1.4218e+16	20	331	12983	0.0833622891291611	0.8547722972915022	PTK2, MAPT, PTEN	5883534743202410
SP_PIR_KEYWORDS	phosphoprotein	16	7.58294e+16	20	7263	19235	3.05563e+11	0.00983270442080253	E2F1, MYO5A, BCL10, KAT2B, PRKCG, PTEN, PRKCB, CASP10, PTK2, CDKN1A, PTK2B, MAPT, CASP7, H3F3A, NGFR, MYC	2.11868e+16
UP_SEQ_FEATURE	sequence variant	16	7.58294e+16	20	11992	19113	0.1077830597473673	0.8360908928067425	E2F1, MYO5A, BCL10, KAT2B, PRKCG, PTEN, DDIT3, PRKCB, CASP10, PTK2, CDKN1A, PTK2B, MAPT, CASP7, NGFR, MYC	1.27505e+16
SP_PIR_KEYWORDS	polymorphism	15	7109004739336490	20	11550	19235	0.1638187554923436	0.6397073937965463	E2F1, MYO5A, KAT2B, PRKCG, PTEN, DDIT3, PRKCB, CASP10, PTK2, CDKN1A, PTK2B, MAPT, CASP7, NGFR, MYC	1249025974025970
GOTERM_BP_FAT	GO:0042592~homeostatic process	6	2843601895734590	20	751	13528	0.0031516063098085073	0.06774257063663935	JMJD6, PTK2B, BCL2L1, MYC, DDIT3, PRKCB	5403994673768300
GOTERM_BP_FAT	GO:0019725~cellular homeostasis	5	2.36967e+16	20	466	13528	0.0035688693838206503	0.07250556453582002	PTK2B, BCL2L1, MYC, DDIT3, PRKCB	7257510729613730
GOTERM_BP_FAT	GO:0006873~cellular ion homeostasis	4	1.89573e+16	20	374	13528	0.014618381597399468	0.18100591177595848	PTK2B, BCL2L1, MYC, PRKCB	7234224598930480
GOTERM_BP_FAT	GO:0055082~cellular chemical homeostasis	4	1.89573e+16	20	380	13528	0.015253915063791505	0.1825723028930697	PTK2B, BCL2L1, MYC, PRKCB	7120000000000000
GOTERM_BP_FAT	GO:0050801~ion homeostasis	4	1.89573e+16	20	409	13528	0.018547494374809275	0.200318824533132	PTK2B, BCL2L1, MYC, PRKCB	6615158924205370
GOTERM_BP_FAT	GO:0048878~chemical homeostasis	4	1.89573e+16	20	512	13528	0.03326294553891247	0.2870096504612185	PTK2B, BCL2L1, MYC, PRKCB	5284375
GOTERM_BP_FAT	GO:0030005~cellular di-, tri-valent inorganic cation homeostasis	3	1.4218e+16	20	227	13528	0.039743437181077895	0.31425794989772693	PTK2B, MYC, PRKCB	893920704845815
GOTERM_BP_FAT	GO:0055066~di-, tri-valent inorganic cation homeostasis	3	1.4218e+16	20	239	13528	0.043630658418725744	0.3303490359111104	PTK2B, MYC, PRKCB	8490376569037650
GOTERM_BP_FAT	GO:0030003~cellular cation homeostasis	3	1.4218e+16	20	254	13528	0.048683602670193116	0.3520796999763254	PTK2B, MYC, PRKCB	7988976377952750
GOTERM_BP_FAT	GO:0055080~cation homeostasis	3	1.4218e+16	20	286	13528	0.06013957458893476	0.4068491408395094	PTK2B, MYC, PRKCB	7095104895104890
GOTERM_BP_FAT	GO:0043542~endothelial cell migration	3	1.4218e+16	20	22	13528	4.24547e+11	0.014661438637407875	PTK2, PTK2B, PTEN	9223636363636360
GOTERM_BP_FAT	GO:0001568~blood vessel development	4	1.89573e+16	20	245	13528	0.004587881506729186	0.08786635832303191	PTK2, JMJD6, PTK2B, PTEN	1104326530612240
GOTERM_BP_FAT	GO:0001944~vasculature development	4	1.89573e+16	20	251	13528	0.004908532879083578	0.08946786057948841	PTK2, JMJD6, PTK2B, PTEN	1.07793e+16
GOTERM_BP_FAT	GO:0031175~neuron projection development	4	1.89573e+16	20	256	13528	0.0051859270066338375	0.09020403596229842	PTK2, PTK2B, NGFR, PTEN	1056875
GOTERM_BP_FAT	GO:0048666~neuron development	4	1.89573e+16	20	339	13528	0.01122005408616307	0.16517702243742294	PTK2, PTK2B, NGFR, PTEN	7981120943952800
GOTERM_BP_FAT	GO:0030030~cell projection organization	4	1.89573e+16	20	368	13528	0.013998458524324181	0.18240720478420291	PTK2, PTK2B, NGFR, PTEN	7352173913043470
GOTERM_BP_FAT	GO:0001525~angiogenesis	3	1.4218e+16	20	148	13528	0.017996465932150863	0.19758208726037252	PTK2, PTK2B, PTEN	1371081081081080
GOTERM_BP_FAT	GO:0030182~neuron differentiation	4	1.89573e+16	20	438	13528	0.022212283844231257	0.22361034417073478	PTK2, PTK2B, NGFR, PTEN	617716894977169
GOTERM_BP_FAT	GO:0006928~cell motion	4	1.89573e+16	20	475	13528	0.02743187456293395	0.25970340455532503	PTK2, PTK2B, NGFR, PTEN	5696
BIOCARTA	h_metPathway:Signaling of Hepatocyte Growth Factor Receptor	3	1.4218e+16	13	34	1437	0.0309234289910214	0.4936796668632967	PTK2, PTK2B, PTEN	9753393665158370
GOTERM_BP_FAT	GO:0048514~blood vessel morphogenesis	3	1.4218e+16	20	211	13528	0.034784832700172186	0.2920679282037518	PTK2, PTK2B, PTEN	9617061611374400
GOTERM_BP_FAT	GO:0007169~transmembrane receptor protein tyrosine kinase signaling pathway	3	1.4218e+16	20	224	13528	0.038793864295911765	0.31091425657094873	PTK2, PTK2B, PTEN	905892857142857
GOTERM_BP_FAT	GO:0006793~phosphorus metabolic process	5	2.36967e+16	20	973	13528	0.04326437790158474	0.3310690163893967	PTK2, PTK2B, PRKCG, PTEN, PRKCB	347584789311408
GOTERM_BP_FAT	GO:0006796~phosphate metabolic process	5	2.36967e+16	20	973	13528	0.04326437790158474	0.3310690163893967	PTK2, PTK2B, PRKCG, PTEN, PRKCB	347584789311408
GOTERM_BP_FAT	GO:0016477~cell migration	3	1.4218e+16	20	276	13528	0.056464569167611736	0.3902156397773945	PTK2, PTK2B, PTEN	7352173913043470
GOTERM_BP_FAT	GO:0048870~cell motility	3	1.4218e+16	20	307	13528	0.06812216178945169	0.4378279452649144	PTK2, PTK2B, PTEN	6609771986970680
GOTERM_BP_FAT	GO:0051674~localization of cell	3	1.4218e+16	20	307	13528	0.06812216178945169	0.4378279452649144	PTK2, PTK2B, PTEN	6609771986970680
GOTERM_BP_FAT	GO:0007167~enzyme linked receptor protein signaling pathway	3	1.4218e+16	20	342	13528	0.08216680359597453	0.4929398325660086	PTK2, PTK2B, PTEN	5933333333333330
GOTERM_BP_FAT	GO:0007166~cell surface receptor linked signal transduction	5	2.36967e+16	20	1856	13528	0.2583647212052099	0.8659304074824912	BCL10, PTK2, JMJD6, PTK2B, PTEN	1822198275862060
GOTERM_BP_FAT	GO:0051726~regulation of cell cycle	5	2.36967e+16	20	331	13528	0.0010197805060095906	0.027753815111584035	E2F1, CDKN1A, NGFR, MYC, PTEN	1.02175e+16
GOTERM_CC_FAT	GO:0005654~nucleoplasm	6	2843601895734590	18	882	12782	0.004757406951684975	0.11555553600470592	E2F1, CDKN1A, KAT2B, CASP7, NGFR, MYC	483068783068783
GOTERM_BP_FAT	GO:0022402~cell cycle process	5	2.36967e+16	20	565	13528	0.007072595686846268	0.11379975277849796	E2F1, CDKN1A, KAT2B, MYC, DDIT3	5985840707964600
KEGG_PATHWAY	hsa05219:Bladder cancer	3	1.4218e+16	18	42	5085	0.008374013593791254	0.057165870440084476	E2F1, CDKN1A, MYC	2.01786e+16
GOTERM_BP_FAT	GO:0007049~cell cycle	5	2.36967e+16	20	776	13528	0.02087565939657535	0.21979277887224125	E2F1, CDKN1A, KAT2B, MYC, DDIT3	4358247422680410
GOTERM_CC_FAT	GO:0031981~nuclear lumen	6	2843601895734590	18	1450	12782	0.03598775236514808	0.4168421633347553	E2F1, CDKN1A, KAT2B, CASP7, NGFR, MYC	2938390804597700
KEGG_PATHWAY	hsa04110:Cell cycle	3	1.4218e+16	18	125	5085	0.06410230386054998	0.18625508503099042	E2F1, CDKN1A, MYC	6779999999999990
GOTERM_CC_FAT	GO:0070013~intracellular organelle lumen	6	2843601895734590	18	1779	12782	0.07612005476789868	0.5575745907458138	E2F1, CDKN1A, KAT2B, CASP7, NGFR, MYC	2394978452314030
GOTERM_CC_FAT	GO:0043233~organelle lumen	6	2843601895734590	18	1820	12782	0.08242944063256488	0.5531419476200425	E2F1, CDKN1A, KAT2B, CASP7, NGFR, MYC	2.34103e+16
GOTERM_CC_FAT	GO:0031974~membrane-enclosed lumen	6	2843601895734590	18	1856	12782	0.08821051107254349	0.5473507309601935	E2F1, CDKN1A, KAT2B, CASP7, NGFR, MYC	2295617816091950
GOTERM_CC_FAT	GO:0044451~nucleoplasm part	3	1.4218e+16	18	555	12782	0.16694212697980648	0.6693375550765428	E2F1, KAT2B, MYC	3838438438438430
GOTERM_BP_FAT	GO:0040008~regulation of growth	4	1.89573e+16	20	341	13528	0.011400178982928309	0.16460739329092167	CDKN1A, PTK2, PTK2B, MAPT	7934310850439880
GOTERM_BP_FAT	GO:0001558~regulation of cell growth	3	1.4218e+16	20	194	13528	0.02981054733663951	0.2697952325718168	CDKN1A, PTK2B, MAPT	1045979381443290
GOTERM_BP_FAT	GO:0008361~regulation of cell size	3	1.4218e+16	20	206	13528	0.03328966543125001	0.2842211225987794	CDKN1A, PTK2B, MAPT	9850485436893200
GOTERM_BP_FAT	GO:0032535~regulation of cellular component size	3	1.4218e+16	20	271	13528	0.05465885299021724	0.38339203452069726	CDKN1A, PTK2B, MAPT	7487822878228780
GOTERM_CC_FAT	GO:0030426~growth cone	3	1.4218e+16	18	54	12782	0.0022876264147844677	0.11125748693639936	MYO5A, PTK2B, MAPT	3945061728395060
GOTERM_CC_FAT	GO:0030427~site of polarized growth	3	1.4218e+16	18	55	12782	0.002372098263625553	0.07830304131886678	MYO5A, PTK2B, MAPT	3.87333e+16
GOTERM_CC_FAT	GO:0043005~neuron projection	4	1.89573e+16	18	342	12782	0.009771044540395079	0.18312839090943034	MYO5A, PTK2B, MAPT, PRKCG	8305393112410650
GOTERM_BP_FAT	GO:0040008~regulation of growth	4	1.89573e+16	20	341	13528	0.011400178982928309	0.16460739329092167	CDKN1A, PTK2, PTK2B, MAPT	7934310850439880
GOTERM_CC_FAT	GO:0042995~cell projection	5	2.36967e+16	18	697	12782	0.011804649995818584	0.1844169918796541	MYO5A, PTK2, PTK2B, MAPT, PRKCG	5094053881715280
GOTERM_BP_FAT	GO:0065003~macromolecular complex assembly	5	2.36967e+16	20	665	13528	0.0124258305239112	0.17199388768256318	BCL10, PTK2, PTK2B, H3F3A, MYC	5085714285714280
GOTERM_BP_FAT	GO:0043933~macromolecular complex subunit organization	5	2.36967e+16	20	710	13528	0.015514300138436094	0.18270373919775085	BCL10, PTK2, PTK2B, H3F3A, MYC	4763380281690140
GOTERM_BP_FAT	GO:0034622~cellular macromolecular complex assembly	3	1.4218e+16	20	318	13528	0.07244016790904731	0.4553764325855949	PTK2, PTK2B, H3F3A	6381132075471690
GOTERM_BP_FAT	GO:0034621~cellular macromolecular complex subunit organization	3	1.4218e+16	20	357	13528	0.08844638524671825	0.5128879484266107	PTK2, PTK2B, H3F3A	5.68403e+16
GOTERM_CC_FAT	GO:0005856~cytoskeleton	5	2.36967e+16	18	1381	12782	0.1031670817466594	0.5511594879689871	MYO5A, PTK2, PTK2B, MAPT, MYC	2571003298736820
GOTERM_BP_FAT	GO:0007010~cytoskeleton organization	3	1.4218e+16	20	436	13528	0.12371626783490451	0.6206465558471786	PTK2, PTK2B, MAPT	4654128440366970
GOTERM_CC_FAT	GO:0044430~cytoskeletal part	4	1.89573e+16	18	952	12782	0.12835161904056458	0.6106467677880514	MYO5A, PTK2B, MAPT, MYC	2.98366e+16
GOTERM_CC_FAT	GO:0043228~non-membrane-bounded organelle	6	2843601895734590	18	2596	12782	0.25229475980351945	0.7932307346730595	MYO5A, PTK2, PTK2B, MAPT, H3F3A, MYC	1.64124e+16
GOTERM_CC_FAT	GO:0043232~intracellular non-membrane-bounded organelle	6	2843601895734590	18	2596	12782	0.25229475980351945	0.7932307346730595	MYO5A, PTK2, PTK2B, MAPT, H3F3A, MYC	1.64124e+16
SP_PIR_KEYWORDS	cell membrane	3	1.4218e+16	20	2194	19235	0.6549945221429716	0.9811315846946265	PTK2, PTK2B, MAPT	1315063810391970
KEGG_PATHWAY	hsa04012:ErbB signaling pathway	5	2.36967e+16	18	87	5085	1.60528e+12	0.002245051210786997	CDKN1A, PTK2, PRKCG, MYC, PRKCB	1623563218390800
KEGG_PATHWAY	hsa04370:VEGF signaling pathway	4	1.89573e+16	18	75	5085	0.001806332675409072	0.01673277550906782	PTK2, PRKCG, PLA2G5, PRKCB	1.50667e+16
SP_PIR_KEYWORDS	kinase	5	2.36967e+16	20	688	19235	0.0040952310840314515	0.09472205242634757	CDKN1A, PTK2, PTK2B, PRKCG, PRKCB	6989462209302320
KEGG_PATHWAY	hsa04670:Leukocyte transendothelial migration	4	1.89573e+16	18	118	5085	0.006531838905095438	0.05107557283958564	PTK2, PTK2B, PRKCG, PRKCB	9576271186440670
GOTERM_CC_FAT	GO:0043005~neuron projection	4	1.89573e+16	18	342	12782	0.009771044540395079	0.18312839090943034	MYO5A, PTK2B, MAPT, PRKCG	8305393112410650
UP_SEQ_FEATURE	domain:Protein kinase	4	1.89573e+16	20	469	19113	0.010618667329138848	0.3263142779014341	PTK2, PTK2B, PRKCG, PRKCB	8150533049040510
GOTERM_CC_FAT	GO:0042995~cell projection	5	2.36967e+16	18	697	12782	0.011804649995818584	0.1844169918796541	MYO5A, PTK2, PTK2B, MAPT, PRKCG	5094053881715280
INTERPRO	IPR017441:Protein kinase, ATP binding site	4	1.89573e+16	19	455	16659	0.012170970696797729	0.340551815700431	PTK2, PTK2B, PRKCG, PRKCB	770803932909196
UP_SEQ_FEATURE	nucleotide phosphate-binding region:ATP	5	2.36967e+16	20	962	19113	0.013486598265180033	0.31394654067939043	MYO5A, PTK2, PTK2B, PRKCG, PRKCB	4966995841995840
INTERPRO	IPR000719:Protein kinase, core	4	1.89573e+16	19	476	16659	0.013742854525566077	0.26923620678992854	PTK2, PTK2B, PRKCG, PRKCB	7367978770455550
UP_SEQ_FEATURE	binding site:ATP	4	1.89573e+16	20	542	19113	0.015668946644660203	0.29573786993798934	PTK2, PTK2B, PRKCG, PRKCB	7052767527675270
UP_SEQ_FEATURE	active site:Proton acceptor	4	1.89573e+16	20	658	19113	0.026095546926144304	0.3868700871027112	PTK2, PTK2B, PRKCG, PRKCB	5809422492401210
KEGG_PATHWAY	hsa04510:Focal adhesion	4	1.89573e+16	18	201	5085	0.02747447927288031	0.11308651130111957	PTK2, PRKCG, PTEN, PRKCB	5621890547263680
SP_PIR_KEYWORDS	atp-binding	5	2.36967e+16	20	1326	19235	0.03789151213417993	0.37397517040881156	MYO5A, PTK2, PTK2B, PRKCG, PRKCB	3.62651e+16
GOTERM_BP_FAT	GO:0006793~phosphorus metabolic process	5	2.36967e+16	20	973	13528	0.04326437790158474	0.3310690163893967	PTK2, PTK2B, PRKCG, PTEN, PRKCB	347584789311408
GOTERM_BP_FAT	GO:0006796~phosphate metabolic process	5	2.36967e+16	20	973	13528	0.04326437790158474	0.3310690163893967	PTK2, PTK2B, PRKCG, PTEN, PRKCB	347584789311408
SP_PIR_KEYWORDS	transferase	5	2.36967e+16	20	1394	19235	0.0443364001536365	0.38661641899164356	PTK2, KAT2B, PTK2B, PRKCG, PRKCB	3.44961e+16
GOTERM_MF_FAT	GO:0004672~protein kinase activity	4	1.89573e+16	20	606	12983	0.056198095227185	0.8538535583194609	PTK2, PTK2B, PRKCG, PRKCB	4284818481848180
GOTERM_BP_FAT	GO:0006468~protein amino acid phosphorylation	4	1.89573e+16	20	667	13528	0.0642121691840021	0.4215207582635897	PTK2, PTK2B, PRKCG, PRKCB	4056371814092950
KEGG_PATHWAY	hsa04650:Natural killer cell mediated cytotoxicity	3	1.4218e+16	18	133	5085	0.07148645884082777	0.19636270917183296	PTK2B, PRKCG, PRKCB	637218045112782
SP_PIR_KEYWORDS	nucleotide-binding	5	2.36967e+16	20	1686	19235	0.07885647045655331	0.5153461169968918	MYO5A, PTK2, PTK2B, PRKCG, PRKCB	2.85216e+16
GOTERM_BP_FAT	GO:0016310~phosphorylation	4	1.89573e+16	20	800	13528	0.09860506728815324	0.5398316684367677	PTK2, PTK2B, PRKCG, PRKCB	3.382e+16
KEGG_PATHWAY	hsa04020:Calcium signaling pathway	3	1.4218e+16	18	176	5085	0.11540517279122203	0.268119326072053	PTK2B, PRKCG, PRKCB	4815340909090900
KEGG_PATHWAY	hsa04062:Chemokine signaling pathway	3	1.4218e+16	18	187	5085	0.12759186748114015	0.28275856690539625	PTK2, PTK2B, PRKCB	4532085561497320
GOTERM_MF_FAT	GO:0005524~ATP binding	5	2.36967e+16	20	1477	12983	0.16261480302410586	0.9273882497359591	MYO5A, PTK2, PTK2B, PRKCG, PRKCB	2.19753e+16
GOTERM_MF_FAT	GO:0032559~adenyl ribonucleotide binding	5	2.36967e+16	20	1497	12983	0.1684041662130427	0.9139335965385418	MYO5A, PTK2, PTK2B, PRKCG, PRKCB	2.16817e+16
GOTERM_MF_FAT	GO:0030554~adenyl nucleotide binding	5	2.36967e+16	20	1577	12983	0.19235400847807482	0.906308566996465	MYO5A, PTK2, PTK2B, PRKCG, PRKCB	2058180088776150
GOTERM_MF_FAT	GO:0001883~purine nucleoside binding	5	2.36967e+16	20	1601	12983	0.19977113856377407	0.8977161831622802	MYO5A, PTK2, PTK2B, PRKCG, PRKCB	2027326670830730
GOTERM_MF_FAT	GO:0001882~nucleoside binding	5	2.36967e+16	20	1612	12983	0.20320426300331612	0.884442931024789	MYO5A, PTK2, PTK2B, PRKCG, PRKCB	2.01349e+16
GOTERM_BP_FAT	GO:0007242~intracellular signaling cascade	4	1.89573e+16	20	1256	13528	0.2563246892503335	0.8657164530703692	BCL10, PTK2B, PRKCG, PRKCB	2154140127388530
GOTERM_MF_FAT	GO:0032555~purine ribonucleotide binding	5	2.36967e+16	20	1836	12983	0.27700291568591395	0.9436348448399626	MYO5A, PTK2, PTK2B, PRKCG, PRKCB	1767837690631800
GOTERM_MF_FAT	GO:0032553~ribonucleotide binding	5	2.36967e+16	20	1836	12983	0.27700291568591395	0.9436348448399626	MYO5A, PTK2, PTK2B, PRKCG, PRKCB	1767837690631800
GOTERM_MF_FAT	GO:0017076~purine nucleotide binding	5	2.36967e+16	20	1918	12983	0.30545133691456117	0.9516770404451875	MYO5A, PTK2, PTK2B, PRKCG, PRKCB	1.69226e+16
GOTERM_MF_FAT	GO:0000166~nucleotide binding	5	2.36967e+16	20	2245	12983	0.4221351104262183	0.9826155460594429	MYO5A, PTK2, PTK2B, PRKCG, PRKCB	1.44577e+16
GOTERM_BP_FAT	GO:0007050~cell cycle arrest	4	1.89573e+16	20	103	13528	3.80128e+12	0.014379434545052194	CDKN1A, KAT2B, MYC, DDIT3	2.6268e+16
UP_SEQ_FEATURE	domain:Leucine-zipper	3	1.4218e+16	20	110	19113	0.005265139572979124	0.25396833572536337	E2F1, MYC, DDIT3	2.60632e+16
GOTERM_BP_FAT	GO:0010604~positive regulation of macromolecule metabolic process	6	2843601895734590	20	857	13528	0.005559847645503552	0.09436373869795267	E2F1, BCL10, PTK2B, PRKCG, MYC, DDIT3	4735589264877470
GOTERM_BP_FAT	GO:0022402~cell cycle process	5	2.36967e+16	20	565	13528	0.007072595686846268	0.11379975277849796	E2F1, CDKN1A, KAT2B, MYC, DDIT3	5985840707964600
SP_PIR_KEYWORDS	cell cycle	4	1.89573e+16	20	461	19235	0.009960634492196611	0.17651103205043972	E2F1, CDKN1A, KAT2B, DDIT3	8344902386117130
GOTERM_BP_FAT	GO:0045935~positive regulation of nucleobase, nucleoside, nucleotide and nucleic acid metabolic process	5	2.36967e+16	20	624	13528	0.00998927283448989	0.15407536437090963	E2F1, BCL10, PRKCG, MYC, DDIT3	5419871794871790
GOTERM_BP_FAT	GO:0051173~positive regulation of nitrogen compound metabolic process	5	2.36967e+16	20	644	13528	0.011134179646922487	0.16706702283807107	E2F1, BCL10, PRKCG, MYC, DDIT3	5251552795031050
GOTERM_BP_FAT	GO:0010557~positive regulation of macromolecule biosynthetic process	5	2.36967e+16	20	654	13528	0.011737657779452277	0.16610476867088964	E2F1, BCL10, PTK2B, MYC, DDIT3	517125382262997
GOTERM_BP_FAT	GO:0031328~positive regulation of cellular biosynthetic process	5	2.36967e+16	20	685	13528	0.013743583171069818	0.18536958647361523	E2F1, BCL10, PTK2B, MYC, DDIT3	4937226277372260
GOTERM_BP_FAT	GO:0009891~positive regulation of biosynthetic process	5	2.36967e+16	20	695	13528	0.01443520487922633	0.18172541907343986	E2F1, BCL10, PTK2B, MYC, DDIT3	4866187050359710
GOTERM_MF_FAT	GO:0003712~transcription cofactor activity	4	1.89573e+16	20	363	12983	0.015062302897441631	0.867148931944042	E2F1, BCL10, KAT2B, DDIT3	7153168044077130
GOTERM_BP_FAT	GO:0007049~cell cycle	5	2.36967e+16	20	776	13528	0.02087565939657535	0.21979277887224125	E2F1, CDKN1A, KAT2B, MYC, DDIT3	4358247422680410
GOTERM_BP_FAT	GO:0008283~cell proliferation	4	1.89573e+16	20	436	13528	0.021947544561586253	0.224015374164928	E2F1, PTK2B, MYC, PTEN	6205504587155960
SP_PIR_KEYWORDS	chromosomal rearrangement	3	1.4218e+16	20	279	19235	0.030474129310151546	0.3487440314491349	BCL10, MYC, DDIT3	1.03414e+16
GOTERM_BP_FAT	GO:0070271~protein complex biogenesis	4	1.89573e+16	20	505	13528	0.03211292497468479	0.28449576381457975	BCL10, PTK2, PTK2B, MYC	5357623762376230
GOTERM_BP_FAT	GO:0006461~protein complex assembly	4	1.89573e+16	20	505	13528	0.03211292497468479	0.28449576381457975	BCL10, PTK2, PTK2B, MYC	5357623762376230
GOTERM_MF_FAT	GO:0008134~transcription factor binding	4	1.89573e+16	20	513	12983	0.03710831464642911	0.9191091254372353	E2F1, BCL10, KAT2B, DDIT3	5061598440545800
GOTERM_BP_FAT	GO:0045941~positive regulation of transcription	4	1.89573e+16	20	564	13528	0.04248601766581186	0.3291555437111161	E2F1, BCL10, MYC, DDIT3	4797163120567370
GOTERM_BP_FAT	GO:0010628~positive regulation of gene expression	4	1.89573e+16	20	581	13528	0.04575903682630098	0.3405487160016276	E2F1, BCL10, MYC, DDIT3	4.6568e+16
GOTERM_BP_FAT	GO:0051252~regulation of RNA metabolic process	6	2843601895734590	20	1813	13528	0.10006006381235116	0.5420258937296165	E2F1, BCL10, KAT2B, JMJD6, MYC, DDIT3	223849972421401
SP_PIR_KEYWORDS	nucleus	8	3.79147e+16	20	4283	19235	0.1087522196409221	0.57644326143438	E2F1, CDKN1A, KAT2B, JMJD6, H3F3A, BCL2L1, MYC, DDIT3	1.7964e+16
GOTERM_MF_FAT	GO:0016563~transcription activator activity	3	1.4218e+16	20	410	12983	0.1196252524222074	0.9111445724975078	E2F1, BCL10, KAT2B	4749878048780480
SP_PIR_KEYWORDS	transcription regulation	5	2.36967e+16	20	2026	19235	0.13250240865120652	0.601157409243084	E2F1, KAT2B, JMJD6, MYC, DDIT3	2.37352e+16
SP_PIR_KEYWORDS	Transcription	5	2.36967e+16	20	2071	19235	0.14059472720453625	0.600905760335747	E2F1, KAT2B, JMJD6, MYC, DDIT3	2.32195e+16
GOTERM_BP_FAT	GO:0045893~positive regulation of transcription, DNA-dependent	3	1.4218e+16	20	477	13528	0.14323415650280197	0.671811346469875	E2F1, BCL10, MYC	4254088050314460
GOTERM_BP_FAT	GO:0051254~positive regulation of RNA metabolic process	3	1.4218e+16	20	481	13528	0.1451751429234911	0.6738569265371516	E2F1, BCL10, MYC	4218711018711010
GOTERM_CC_FAT	GO:0044451~nucleoplasm part	3	1.4218e+16	18	555	12782	0.16694212697980648	0.6693375550765428	E2F1, KAT2B, MYC	3838438438438430
GOTERM_MF_FAT	GO:0030528~transcription regulator activity	5	2.36967e+16	20	1512	12983	0.1727998185479912	0.89911246554426	E2F1, BCL10, KAT2B, MYC, DDIT3	2146660052910050
GOTERM_BP_FAT	GO:0044093~positive regulation of molecular function	3	1.4218e+16	20	586	13528	0.19794899103252758	0.784434598499245	BCL10, PTK2B, MYC	3462798634812280
GOTERM_BP_FAT	GO:0006355~regulation of transcription, DNA-dependent	5	2.36967e+16	20	1773	13528	0.23189274614885338	0.8378914295444443	E2F1, BCL10, KAT2B, MYC, DDIT3	1907501410039480
SP_PIR_KEYWORDS	dna-binding	4	1.89573e+16	20	1868	19235	0.2790319676632336	0.7954061185943148	E2F1, H3F3A, MYC, DDIT3	2.05942e+16
GOTERM_BP_FAT	GO:0045449~regulation of transcription	6	2843601895734590	20	2601	13528	0.2953403535717087	0.9030541229831835	E2F1, BCL10, KAT2B, JMJD6, MYC, DDIT3	1.56032e+16
GOTERM_BP_FAT	GO:0006350~transcription	5	2.36967e+16	20	2101	13528	0.34021027609895915	0.93602841827324	E2F1, KAT2B, JMJD6, MYC, DDIT3	1609709662065680
GOTERM_MF_FAT	GO:0003700~transcription factor activity	3	1.4218e+16	20	975	12983	0.42317230759115393	0.9787517722316087	E2F1, MYC, DDIT3	1.99738e+16
GOTERM_MF_FAT	GO:0003677~DNA binding	4	1.89573e+16	20	2331	12983	0.6894199602644822	0.9995802854268478	E2F1, H3F3A, MYC, DDIT3	1113942513942510
KEGG_PATHWAY	hsa05214:Glioma	5	2.36967e+16	18	63	5085	4.51357e+11	0.0025244648851078244	E2F1, CDKN1A, PRKCG, PTEN, PRKCB	2242063492063490
KEGG_PATHWAY	hsa04070:Phosphatidylinositol signaling system	3	1.4218e+16	18	74	5085	0.024674442098320676	0.1100516083357772	PRKCG, PTEN, PRKCB	1.14527e+16
KEGG_PATHWAY	hsa04510:Focal adhesion	4	1.89573e+16	18	201	5085	0.02747447927288031	0.11308651130111957	PTK2, PRKCG, PTEN, PRKCB	5621890547263680
GOTERM_BP_FAT	GO:0006796~phosphate metabolic process	5	2.36967e+16	20	973	13528	0.04326437790158474	0.3310690163893967	PTK2, PTK2B, PRKCG, PTEN, PRKCB	347584789311408
GOTERM_BP_FAT	GO:0006793~phosphorus metabolic process	5	2.36967e+16	20	973	13528	0.04326437790158474	0.3310690163893967	PTK2, PTK2B, PRKCG, PTEN, PRKCB	347584789311408
KEGG_PATHWAY	hsa04530:Tight junction	3	1.4218e+16	18	134	5085	0.07242894861662914	0.189837529102588	PRKCG, PTEN, PRKCB	6324626865671640
GOTERM_MF_FAT	GO:0008289~lipid binding	3	1.4218e+16	20	450	12983	0.1393140819626925	0.9174355496379271	PRKCG, PTEN, PRKCB	4.32767e+16
GOTERM_MF_FAT	GO:0046872~metal ion binding	6	2843601895734590	20	4140	12983	0.7743864294124615	0.9999197127864407	CDKN1A, JMJD6, PRKCG, PTEN, PLA2G5, PRKCB	0.9407971014492753
GOTERM_MF_FAT	GO:0043169~cation binding	6	2843601895734590	20	4179	12983	0.7826394160797698	0.9999016087208262	CDKN1A, JMJD6, PRKCG, PTEN, PLA2G5, PRKCB	0.9320172290021537
GOTERM_MF_FAT	GO:0043167~ion binding	6	2843601895734590	20	4241	12983	0.795344774130208	0.9998962675401284	CDKN1A, JMJD6, PRKCG, PTEN, PLA2G5, PRKCB	0.918391888705494
GOTERM_BP_FAT	GO:0010604~positive regulation of macromolecule metabolic process	6	2843601895734590	20	857	13528	0.005559847645503552	0.09436373869795267	E2F1, BCL10, PTK2B, PRKCG, MYC, DDIT3	4735589264877470
GOTERM_BP_FAT	GO:0031399~regulation of protein modification process	3	1.4218e+16	20	295	13528	0.0635176449504248	0.42124246570443313	BCL10, PTK2B, PRKCG	687864406779661
GOTERM_BP_FAT	GO:0032268~regulation of cellular protein metabolic process	3	1.4218e+16	20	474	13528	0.14178245541603626	0.6710939084052676	BCL10, PTK2B, PRKCG	4281012658227840
GOTERM_BP_FAT	GO:0007242~intracellular signaling cascade	4	1.89573e+16	20	1256	13528	0.2563246892503335	0.8657164530703692	BCL10, PTK2B, PRKCG, PRKCB	2154140127388530
KEGG_PATHWAY	hsa05214:Glioma	5	2.36967e+16	18	63	5085	4.51357e+11	0.0025244648851078244	E2F1, CDKN1A, PRKCG, PTEN, PRKCB	2242063492063490
KEGG_PATHWAY	hsa04010:MAPK signaling pathway	6	2843601895734590	18	267	5085	0.0014115508757701776	0.01569605082063863	MAPT, PRKCG, MYC, DDIT3, PLA2G5, PRKCB	6348314606741570
KEGG_PATHWAY	hsa04370:VEGF signaling pathway	4	1.89573e+16	18	75	5085	0.001806332675409072	0.01673277550906782	PTK2, PRKCG, PLA2G5, PRKCB	1.50667e+16
KEGG_PATHWAY	hsa04730:Long-term depression	3	1.4218e+16	18	69	5085	0.021641904806402053	0.11531651549586286	PRKCG, PLA2G5, PRKCB	1.22826e+16
KEGG_PATHWAY	hsa04270:Vascular smooth muscle contraction	3	1.4218e+16	18	112	5085	0.052729824587285444	0.16343028248513425	PRKCG, PLA2G5, PRKCB	7566964285714280
SP_PIR_KEYWORDS	calcium	3	1.4218e+16	20	803	19235	0.1870483544098214	0.6723963443817145	PRKCG, PLA2G5, PRKCB	3.59309e+16
SP_PIR_KEYWORDS	metal-binding	5	2.36967e+16	20	2972	19235	0.3365380552474056	0.8361786041149897	CDKN1A, JMJD6, PRKCG, PLA2G5, PRKCB	1.61802e+16
GOTERM_MF_FAT	GO:0005509~calcium ion binding	3	1.4218e+16	20	919	12983	0.3934659554032587	0.9799939598794551	PRKCG, PLA2G5, PRKCB	2.1191e+16
SP_PIR_KEYWORDS	zinc-finger	3	1.4218e+16	20	1718	19235	0.5160682789958699	0.953160617190092	CDKN1A, PRKCG, PRKCB	1.67942e+16
SP_PIR_KEYWORDS	zinc	3	1.4218e+16	20	2189	19235	0.6536986413554786	0.9836663863680625	CDKN1A, PRKCG, PRKCB	1.31807e+16
GOTERM_MF_FAT	GO:0046872~metal ion binding	6	2843601895734590	20	4140	12983	0.7743864294124615	0.9999197127864407	CDKN1A, JMJD6, PRKCG, PTEN, PLA2G5, PRKCB	0.9407971014492753
GOTERM_MF_FAT	GO:0043169~cation binding	6	2843601895734590	20	4179	12983	0.7826394160797698	0.9999016087208262	CDKN1A, JMJD6, PRKCG, PTEN, PLA2G5, PRKCB	0.9320172290021537
GOTERM_MF_FAT	GO:0043167~ion binding	6	2843601895734590	20	4241	12983	0.795344774130208	0.9998962675401284	CDKN1A, JMJD6, PRKCG, PTEN, PLA2G5, PRKCB	0.918391888705494
GOTERM_MF_FAT	GO:0046914~transition metal ion binding	4	1.89573e+16	20	2785	12983	0.807412488893444	0.9998914455823746	CDKN1A, JMJD6, PRKCG, PRKCB	0.9323518850987433
GOTERM_MF_FAT	GO:0008270~zinc ion binding	3	1.4218e+16	20	2311	12983	0.8767775068008572	0.999985463135037	CDKN1A, PRKCG, PRKCB	0.8426871484205971
GOTERM_CC_FAT	GO:0005856~cytoskeleton	5	2.36967e+16	18	1381	12782	0.1031670817466594	0.5511594879689871	MYO5A, PTK2, PTK2B, MAPT, MYC	2571003298736820
SP_PIR_KEYWORDS	alternative splicing	10	4739336492890990	20	7488	19235	0.2978268341060628	0.8046926535804814	MYO5A, CASP10, PTK2, JMJD6, PTK2B, CASP7, MAPT, BCL2L1, MYC, PRKCB	1.28439e+16
UP_SEQ_FEATURE	splice variant	10	4739336492890990	20	7458	19113	0.30072951623899913	0.9930104034411221	MYO5A, CASP10, PTK2, JMJD6, PTK2B, CASP7, MAPT, BCL2L1, MYC, PRKCB	1.28138e+16
GOTERM_CC_FAT	GO:0005886~plasma membrane	9	4265402843601890	18	3777	12782	0.09694235859350417	0.5542100463665034	BCL10, PTK2, JMJD6, PTK2B, MAPT, BCL2L1, NGFR, PLA2G5, PRKCB	1.69208e+16
GOTERM_CC_FAT	GO:0044459~plasma membrane part	6	2843601895734590	18	2203	12782	0.15513637234323635	0.6621773025854137	BCL10, PTK2, PTK2B, MAPT, BCL2L1, NGFR	1934029353911330
SP_PIR_KEYWORDS	membrane	7	3.31754e+16	20	6256	19235	0.6198788246936032	0.9799467390043652	BCL10, PTK2, PTK2B, MAPT, BCL2L1, NGFR, PRKCB	1.07613e+16
