# Supplementary material for: Decoding the anticancer activity of VO-clioquinol compound: the mechanism of action and cell death pathways in human osteosarcoma cells
Source: Royal Society of Chemistry journal article supplement (doi:10.1039/c7mt00068e), 2017-01-01
Supplement: c7mt00068e6.xlsx [file c7mt00068e6.xlsx]

## Sheet: t2t_0777FA1E51941435823072957
Annotation Database Categories	Biological Term enriched	N proteins in term	%	N proteins in Total	Population Hits	Population Total	p.value	adj.p.value (Benjamini)	Proteins IDs	Fold Enrichment
GOTERM_BP_FAT	GO:0042981~regulation of apoptosis	27	2.57388e+16	78	804	13528	114.655	1.64345e+06	SNCB, PML, CDH1, HSPA1A, NFKB1, PRDX3, BCL2L1, CASP5, AKT1, CASP6, CASP4, CDKN2A, NOS3, DAP, MYC, TERF1, PRKCA, FADD, DDIT3, DAPK1, MAPK1, CASP10, CDKN1A, KRT18, JUN, MAPK8, ABL1	5824339839265210
GOTERM_BP_FAT	GO:0043067~regulation of programmed cell death	27	2.57388e+16	78	812	13528	1443.59	103412	SNCB, PML, CDH1, HSPA1A, NFKB1, PRDX3, BCL2L1, CASP5, AKT1, CASP6, CASP4, CDKN2A, NOS3, DAP, MYC, TERF1, PRKCA, FADD, DDIT3, DAPK1, MAPK1, CASP10, CDKN1A, KRT18, JUN, MAPK8, ABL1	5766957180750280
GOTERM_BP_FAT	GO:0010941~regulation of cell death	27	2.57388e+16	78	815	13528	157.39	75198.8	SNCB, PML, CDH1, HSPA1A, NFKB1, PRDX3, BCL2L1, CASP5, AKT1, CASP6, CASP4, CDKN2A, NOS3, DAP, MYC, TERF1, PRKCA, FADD, DDIT3, DAPK1, MAPK1, CASP10, CDKN1A, KRT18, JUN, MAPK8, ABL1	5745729117508250
GOTERM_BP_FAT	GO:0008219~cell death	25	2.38322e+16	78	719	13528	667.988	239319	PML, GJA1, NFKB1, BCL2L1, CASP5, AKT1, TOP1, CASP6, CASP4, CDKN2A, PTK2B, CASP7, NEFH, DAP, PAK1, MYC, TERF1, PRKCG, FADD, DAPK1, CASP10, KRT18, JMJD6, JUN, MAPK8	6030455404586140
GOTERM_BP_FAT	GO:0016265~death	25	2.38322e+16	78	724	13528	775.514	2.22256e+06	PML, GJA1, NFKB1, BCL2L1, CASP5, AKT1, TOP1, CASP6, CASP4, CDKN2A, PTK2B, CASP7, NEFH, DAP, PAK1, MYC, TERF1, PRKCG, FADD, DAPK1, CASP10, KRT18, JMJD6, JUN, MAPK8	5988808613118000
GOTERM_BP_FAT	GO:0012501~programmed cell death	23	219256434699714	78	611	13528	17267.4	412401	PML, GJA1, FADD, NFKB1, BCL2L1, DAPK1, CASP5, AKT1, CASP10, CASP6, TOP1, CDKN2A, KRT18, CASP4, JMJD6, PTK2B, JUN, CASP7, MAPK8, DAP, PAK1, MYC, TERF1	6528683536866840
GOTERM_BP_FAT	GO:0006915~apoptosis	22	2.09724e+16	78	602	13528	112681	2.30674e+07	PML, GJA1, FADD, NFKB1, BCL2L1, DAPK1, CASP5, AKT1, CASP10, CASP6, CDKN2A, KRT18, CASP4, JMJD6, PTK2B, JUN, CASP7, MAPK8, DAP, PAK1, MYC, TERF1	6338188942840100
GOTERM_BP_FAT	GO:0043065~positive regulation of apoptosis	19	1811248808388940	78	430	13528	224503	4.0214e+06	PRKCA, PML, FADD, BCL2L1, DDIT3, DAPK1, AKT1, CASP10, MAPK1, CASP6, CDKN1A, CDKN2A, CASP4, JUN, MAPK8, DAP, ABL1, MYC, TERF1	7663446630888490
GOTERM_BP_FAT	GO:0043068~positive regulation of programmed cell death	19	1811248808388940	78	433	13528	251849	4.00999e+06	PRKCA, PML, FADD, BCL2L1, DDIT3, DAPK1, AKT1, CASP10, MAPK1, CASP6, CDKN1A, CDKN2A, CASP4, JUN, MAPK8, DAP, ABL1, MYC, TERF1	7610351157695260
GOTERM_BP_FAT	GO:0010942~positive regulation of cell death	19	1811248808388940	78	435	13528	271769	389445	PRKCA, PML, FADD, BCL2L1, DDIT3, DAPK1, AKT1, CASP10, MAPK1, CASP6, CDKN1A, CDKN2A, CASP4, JUN, MAPK8, DAP, ABL1, MYC, TERF1	7575361037430000
GOTERM_BP_FAT	GO:0006917~induction of apoptosis	15	1.42993e+16	78	320	13528	2.83738e+07	2.90426e+09	PRKCA, PML, FADD, DAPK1, MAPK1, CASP6, CASP10, CDKN1A, CDKN2A, CASP4, MAPK8, DAP, ABL1, MYC, TERF1	8129807692307690
GOTERM_BP_FAT	GO:0012502~induction of programmed cell death	15	1.42993e+16	78	321	13528	2.95367e+06	2.82174e+08	PRKCA, PML, FADD, DAPK1, MAPK1, CASP6, CASP10, CDKN1A, CDKN2A, CASP4, MAPK8, DAP, ABL1, MYC, TERF1	8104481188593330
SP_PIR_KEYWORDS	Apoptosis	13	1.23928e+16	78	381	19235	3.54085e+08	8.63083e+08	FADD, NFKB1, BCL2L1, DAPK1, AKT1, CASP5, CASP6, CASP10, CDKN2A, CASP4, CASP7, PAK1, DAP	8414260717410320
GOTERM_BP_FAT	GO:0043066~negative regulation of apoptosis	12	1.14395e+16	78	354	13528	4.80645e+08	2.22158e+11	AKT1, CDKN1A, KRT18, SNCB, NOS3, NFKB1, MAPK8, HSPA1A, PRDX3, BCL2L1, MYC, DAPK1	5879182963928720
GOTERM_BP_FAT	GO:0043069~negative regulation of programmed cell death	12	1.14395e+16	78	359	13528	5.49459e+08	2.38571e+12	AKT1, CDKN1A, KRT18, SNCB, NOS3, NFKB1, MAPK8, HSPA1A, PRDX3, BCL2L1, MYC, DAPK1	5797300192843360
GOTERM_BP_FAT	GO:0060548~negative regulation of cell death	12	1.14395e+16	78	360	13528	5.64212e+09	2.30978e+12	AKT1, CDKN1A, KRT18, SNCB, NOS3, NFKB1, MAPK8, HSPA1A, PRDX3, BCL2L1, MYC, DAPK1	5781196581196580
GOTERM_BP_FAT	GO:0008624~induction of apoptosis by extracellular signals	6	0.5719733079122974	78	112	13528	4.37319e+12	0.007262048657102116	PRKCA, CASP10, MAPK8, FADD, DAP, DAPK1	929120879120879
GOTERM_CC_FAT	GO:0005856~cytoskeleton	28	2669208770257380	69	1381	12782	526722	5.63592e+08	MYO5A, CDH1, VCL, AKT1, PTK2, EZR, PTK2B, MAPT, KRT7, NEFH, NOS3, KRT4, NOS2, MYC, TERF1, INA, NOS1, KRT13, KRT10, RB1, CTNNA1, DAPK1, MAPK1, KRT19, KRT18, CSTA, ABL1, CALM1	3755900471198140
GOTERM_CC_FAT	GO:0043232~intracellular non-membrane-bounded organelle	34	3241182078169680	69	2596	12782	1.72308e+08	9.21845e+09	MYO5A, PML, CDH1, VCL, AKT1, TOP1, PTK2, CDKN2A, EZR, PTK2B, MAPT, KRT7, NEFH, NOS3, KRT4, NOS2, MYC, TERF1, INA, NOS1, SUV39H1, KRT13, KRT10, RB1, CTNNA1, DAPK1, MAPK1, KRT19, KRT18, JUN, H3F3A, CSTA, ABL1, CALM1	2.42619e+16
GOTERM_CC_FAT	GO:0043228~non-membrane-bounded organelle	34	3241182078169680	69	2596	12782	1.72308e+08	9.21845e+09	MYO5A, PML, CDH1, VCL, AKT1, TOP1, PTK2, CDKN2A, EZR, PTK2B, MAPT, KRT7, NEFH, NOS3, KRT4, NOS2, MYC, TERF1, INA, NOS1, SUV39H1, KRT13, KRT10, RB1, CTNNA1, DAPK1, MAPK1, KRT19, KRT18, JUN, H3F3A, CSTA, ABL1, CALM1	2.42619e+16
GOTERM_CC_FAT	GO:0044430~cytoskeletal part	17	1.62059e+16	69	952	12782	2.90729e+11	7.77408e+11	INA, MYO5A, KRT13, KRT10, RB1, AKT1, KRT19, EZR, KRT18, PTK2B, MAPT, KRT7, NEFH, KRT4, MYC, CALM1, TERF1	3307971014492750
GOTERM_BP_FAT	GO:0007049~cell cycle	22	2.09724e+16	78	776	13528	1.22932e+07	1.46801e+08	CDC7, KAT2B, PML, SUV39H1, CDK6, RB1, CDK7, CDK4, CDC25C, DDIT3, AKT1, MAPK1, CDKN1A, CDKN2A, KRT18, CCND3, KRT7, ABL1, MYC, CCNA2, CALM1, TERF1	4.917e+16
GOTERM_CC_FAT	GO:0005654~nucleoplasm	22	2.09724e+16	69	882	12782	2.73157e+06	1.94852e+09	CDC7, KAT2B, SMAD4, PML, NFKB1, RB1, CDK7, CDK4, CDC25C, AKT1, CASP6, MAPK1, TOP1, CDKN1A, CDKN2A, JUN, CASP7, MAPK8, MYC, CCNA2, CALM1, TERF1	4620657925005750
GOTERM_BP_FAT	GO:0051726~regulation of cell cycle	15	1.42993e+16	78	331	13528	4.38011e+06	3.92293e+09	CDC7, PML, CDK6, RB1, CDK7, CDC25C, CDK4, AKT1, CDKN1A, CDKN2A, CCND3, JUN, MYC, CCNA2, TERF1	7859632814315590
GOTERM_BP_FAT	GO:0022402~cell cycle process	16	1.52526e+16	78	565	13528	5.46314e+08	3.72787e+11	CDC7, KAT2B, PML, CDK6, RB1, CDC25C, CDK4, DDIT3, AKT1, CDKN1A, CDKN2A, KRT7, ABL1, MYC, CCNA2, TERF1	4911459042432490
GOTERM_CC_FAT	GO:0031981~nuclear lumen	24	2.28789e+16	69	1450	12782	7.74698e+08	3.31565e+09	CDC7, KAT2B, SMAD4, PML, NFKB1, RB1, CDK7, CDK4, CDC25C, AKT1, CASP6, MAPK1, TOP1, CDKN1A, CDKN2A, JUN, CASP7, NOS3, MAPK8, ABL1, MYC, CCNA2, CALM1, TERF1	3.06615e+16
GOTERM_CC_FAT	GO:0070013~intracellular organelle lumen	24	2.28789e+16	69	1779	12782	2.5383e+09	7.75705e+11	CDC7, KAT2B, SMAD4, PML, NFKB1, RB1, CDK7, CDK4, CDC25C, AKT1, CASP6, MAPK1, TOP1, CDKN1A, CDKN2A, JUN, CASP7, NOS3, MAPK8, ABL1, MYC, CCNA2, CALM1, TERF1	2.49911e+16
GOTERM_CC_FAT	GO:0043233~organelle lumen	24	2.28789e+16	69	1820	12782	3.67451e+11	8.73351e+11	CDC7, KAT2B, SMAD4, PML, NFKB1, RB1, CDK7, CDK4, CDC25C, AKT1, CASP6, MAPK1, TOP1, CDKN1A, CDKN2A, JUN, CASP7, NOS3, MAPK8, ABL1, MYC, CCNA2, CALM1, TERF1	2442809364548490
GOTERM_CC_FAT	GO:0031974~membrane-enclosed lumen	24	2.28789e+16	69	1856	12782	5.0334e+10	0.0010765947170007228	CDC7, KAT2B, SMAD4, PML, NFKB1, RB1, CDK7, CDK4, CDC25C, AKT1, CASP6, MAPK1, TOP1, CDKN1A, CDKN2A, JUN, CASP7, NOS3, MAPK8, ABL1, MYC, CCNA2, CALM1, TERF1	2.39543e+16
KEGG_PATHWAY	hsa05220:Chronic myeloid leukemia	12	1.14395e+16	55	75	5085	1950.22	8.0934e+06	AKT1, MAPK1, CDKN1A, CDKN2A, SMAD4, NFKB1, CDK6, RB1, BCL2L1, ABL1, CDK4, MYC	1.47927e+16
SP_PIR_KEYWORDS	cell cycle	16	1.52526e+16	78	461	19235	3.56942e+06	1.74009e+08	CDC7, KAT2B, SUV39H1, CDK6, RB1, CDK7, CDC25C, CDK4, DDIT3, MAPK1, CDKN1A, CDKN2A, KRT18, CCND3, CCNA2, TERF1	8558874242171420
GOTERM_BP_FAT	GO:0051325~interphase	11	1.04862e+16	78	106	13528	4.01506e+06	5.23052e+07	CDC7, AKT1, CDKN1A, CDKN2A, KRT7, CDK6, RB1, ABL1, CDK4, CDC25C, TERF1	1.79981e+16
GOTERM_BP_FAT	GO:0007049~cell cycle	22	2.09724e+16	78	776	13528	1.22932e+07	1.46801e+08	CDC7, KAT2B, PML, SUV39H1, CDK6, RB1, CDK7, CDK4, CDC25C, DDIT3, AKT1, MAPK1, CDKN1A, CDKN2A, KRT18, CCND3, KRT7, ABL1, MYC, CCNA2, CALM1, TERF1	4.917e+16
SP_PIR_KEYWORDS	cell cycle control	7	0.667302192564347	78	31	19235	2.29443e+07	8.94826e+07	CDKN2A, CCND3, CDK6, RB1, CDK4, CDC25C, CCNA2	5568444995864350
KEGG_PATHWAY	hsa04110:Cell cycle	13	1.23928e+16	55	125	5085	4.09566e+06	6.79879e+06	CDC7, SMAD4, CDK6, RB1, CDK7, CDC25C, CDK4, CDKN1A, CDKN2A, CCND3, ABL1, MYC, CCNA2	9615272727272720
GOTERM_BP_FAT	GO:0051726~regulation of cell cycle	15	1.42993e+16	78	331	13528	4.38011e+06	3.92293e+09	CDC7, PML, CDK6, RB1, CDK7, CDC25C, CDK4, AKT1, CDKN1A, CDKN2A, CCND3, JUN, MYC, CCNA2, TERF1	7859632814315590
GOTERM_BP_FAT	GO:0051329~interphase of mitotic cell cycle	10	0.9532888465204957	78	103	13528	6.33484e+06	5.33989e+08	CDC7, AKT1, CDKN1A, CDKN2A, CDK6, RB1, ABL1, CDK4, CDC25C, TERF1	1.68384e+16
GOTERM_BP_FAT	GO:0022402~cell cycle process	16	1.52526e+16	78	565	13528	5.46314e+08	3.72787e+11	CDC7, KAT2B, PML, CDK6, RB1, CDC25C, CDK4, DDIT3, AKT1, CDKN1A, CDKN2A, KRT7, ABL1, MYC, CCNA2, TERF1	4911459042432490
SP_PIR_KEYWORDS	cyclin	6	0.5719733079122974	78	50	19235	1.65865e+10	2.48795e+11	CDKN1A, CDKN2A, CCND3, CDK6, CDK4, CCNA2	2.95923e+16
GOTERM_BP_FAT	GO:0051301~cell division	11	1.04862e+16	78	295	13528	6.30156e+09	2.44029e+11	CDC7, TOP1, CDKN2A, CCND3, CDK6, RB1, CDK7, CDK4, CDC25C, CCNA2, TERF1	6467101260321590
KEGG_PATHWAY	hsa05218:Melanoma	8	0.7626310772163966	55	71	5085	8.0523e+09	6.07567e+10	AKT1, MAPK1, CDKN1A, CDKN2A, CDK6, CDH1, RB1, CDK4	1041741357234310
GOTERM_BP_FAT	GO:0000082~G1/S transition of mitotic cell cycle	6	0.5719733079122974	78	56	13528	1.5951e+10	5.19365e+11	CDC7, AKT1, CDKN1A, CDKN2A, RB1, CDK4	1858241758241750
GOTERM_BP_FAT	GO:0022403~cell cycle phase	12	1.14395e+16	78	414	13528	2.09632e+10	6.38958e+11	CDC7, AKT1, CDKN1A, CDKN2A, KRT7, CDK6, RB1, ABL1, CDK4, CDC25C, CCNA2, TERF1	502712746191007
GOTERM_CC_FAT	GO:0000307~cyclin-dependent protein kinase holoenzyme complex	4	0.3813155386081983	69	11	12782	2.30487e+10	8.21742e+11	CDKN1A, CCND3, CDK6, CDK4	673623188405797
GOTERM_BP_FAT	GO:0000278~mitotic cell cycle	11	1.04862e+16	78	370	13528	4.45318e+10	0.0011189429654673289	CDC7, AKT1, CDKN1A, CDKN2A, CDK6, RB1, ABL1, CDK4, CDC25C, CCNA2, TERF1	5156202356202350
BIOCARTA	h_cellcyclePathway:Cyclins and Cell Cycle Regulation	7	0.667302192564347	45	25	1437	6.66689e+10	0.0027131604038035384	CDKN1A, CDKN2A, CCND3, CDK6, RB1, CDK7, CDK4	8941333333333330
SP_PIR_KEYWORDS	cell division	8	0.7626310772163966	78	264	19235	8.98565e+10	8.34072e+11	CDC7, CCND3, CDK6, CDK7, CDK4, CDC25C, CCNA2, TERF1	7472804972804970
GOTERM_BP_FAT	GO:0045786~negative regulation of cell cycle	6	0.5719733079122974	78	81	13528	9.57815e+10	0.0022850761151608223	CDKN1A, CDKN2A, PML, CDK6, RB1, TERF1	1.28471e+16
BIOCARTA	h_g1Pathway:Cell Cycle: G1/S Check Point	7	0.667302192564347	45	29	1437	1.63058e+12	0.005302007099903916	CDKN1A, CDKN2A, SMAD4, CDK6, RB1, ABL1, CDK4	7708045977011490
BBID	94.E2F_transcriptional_activity_cell_cycle	5	0.47664442326024786	20	7	358	1.81745e+12	0.009767103044383552	CDKN1A, CDKN2A, CDK6, RB1, CDK4	1.27857e+16
GOTERM_BP_FAT	GO:0048146~positive regulation of fibroblast proliferation	4	0.3813155386081983	78	26	13528	4.19527e+11	0.007049249335279062	CDKN1A, CDK6, CDK4, CCNA2	2.66824e+16
GOTERM_MF_FAT	GO:0004693~cyclin-dependent protein kinase activity	4	0.3813155386081983	75	30	12983	6.46129e+11	0.013003070932160576	CCND3, CDK6, CDK7, CDK4	2308088888888880
GOTERM_BP_FAT	GO:0048145~regulation of fibroblast proliferation	4	0.3813155386081983	78	35	13528	0.0010179336380835896	0.015245143713843223	CDKN1A, CDK6, CDK4, CCNA2	1.98212e+16
KEGG_PATHWAY	hsa04115:p53 signaling pathway	5	0.47664442326024786	55	68	5085	0.0055978022885583385	0.01445460453482239	CDKN1A, CDKN2A, CCND3, CDK6, CDK4	679812834224599
BBID	26.cyclin-CDK_complexes	4	0.3813155386081983	20	15	358	0.03850279058969419	0.5067529393097208	CDKN1A, CDKN2A, CDK6, CDK4	4773333333333330
SP_PIR_KEYWORDS	kinase	19	1811248808388940	78	688	19235	16719.2	1.08675e+07	PRKCA, CDC7, TBK1, CDK6, PRKCG, CDK7, CDK4, DAPK1, PRKCB, AKT1, MAPK1, PTK2, CDKN1A, CDKN2A, PTK2B, MAPK8, PAK1, ABL1, CALM1	6810245229576620
UP_SEQ_FEATURE	domain:Protein kinase	16	1.52526e+16	78	469	19113	493498	9.69723e+07	PRKCA, CDC7, TBK1, CDK6, PRKCG, CDK7, CDK4, DAPK1, PRKCB, AKT1, MAPK1, PTK2, PTK2B, MAPK8, PAK1, ABL1	8359521075938980
KEGG_PATHWAY	hsa04012:ErbB signaling pathway	12	1.14395e+16	55	87	5085	1.01458e+06	2.10524e+07	PRKCA, AKT1, MAPK1, CDKN1A, PTK2, JUN, PRKCG, MAPK8, PAK1, ABL1, MYC, PRKCB	1.27524e+16
INTERPRO	IPR017441:Protein kinase, ATP binding site	16	1.52526e+16	76	455	16659	1.41848e+07	3.19159e+09	PRKCA, CDC7, TBK1, CDK6, PRKCG, CDK7, CDK4, DAPK1, PRKCB, AKT1, MAPK1, PTK2, PTK2B, MAPK8, PAK1, ABL1	770803932909196
INTERPRO	IPR000719:Protein kinase, core	16	1.52526e+16	76	476	16659	2.62306e+07	2.95094e+08	PRKCA, CDC7, TBK1, CDK6, PRKCG, CDK7, CDK4, DAPK1, PRKCB, AKT1, MAPK1, PTK2, PTK2B, MAPK8, PAK1, ABL1	7367978770455550
UP_SEQ_FEATURE	binding site:ATP	16	1.52526e+16	78	542	19113	3.55355e+06	4.65515e+08	PRKCA, CDC7, TBK1, CDK6, PRKCG, CDK7, CDK4, DAPK1, PRKCB, AKT1, MAPK1, PTK2, PTK2B, MAPK8, PAK1, ABL1	7233607720692590
SP_PIR_KEYWORDS	serine/threonine-protein kinase	13	1.23928e+16	78	381	19235	3.54085e+08	8.63083e+08	PRKCA, CDC7, TBK1, PRKCG, CDK6, CDK7, CDK4, DAPK1, PRKCB, AKT1, MAPK1, MAPK8, PAK1	8414260717410320
UP_SEQ_FEATURE	active site:Proton acceptor	16	1.52526e+16	78	658	19113	4.70227e+07	2.63999e+10	PRKCA, CDC7, TBK1, CDK6, PRKCG, CDK7, CDK4, DAPK1, PRKCB, AKT1, MAPK1, PTK2, PTK2B, MAPK8, PAK1, ABL1	5958382043488420
INTERPRO	IPR008271:Serine/threonine protein kinase, active site	13	1.23928e+16	76	354	16659	5.52563e+08	3.10816e+09	PRKCA, CDC7, TBK1, PRKCG, CDK6, CDK7, CDK4, DAPK1, PRKCB, AKT1, MAPK1, MAPK8, PAK1	8049620874219440
INTERPRO	IPR017442:Serine/threonine protein kinase-related	13	1.23928e+16	76	359	16659	6.44085e+07	2.89838e+09	PRKCA, CDC7, TBK1, PRKCG, CDK6, CDK7, CDK4, DAPK1, PRKCB, AKT1, MAPK1, MAPK8, PAK1	7937509162879340
GOTERM_MF_FAT	GO:0004672~protein kinase activity	17	1.62059e+16	75	606	12983	2.24527e+09	5.45585e+10	PRKCA, CDC7, TBK1, CDK6, PRKCG, CDK7, CDK4, DAPK1, PRKCB, AKT1, MAPK1, PTK2, CCND3, PTK2B, MAPK8, PAK1, ABL1	4856127612761270
INTERPRO	IPR002290:Serine/threonine protein kinase	11	1.04862e+16	76	259	16659	2.36687e+09	7.60776e+09	PRKCA, AKT1, MAPK1, CDK6, PRKCG, MAPK8, CDK7, PAK1, CDK4, PRKCB, DAPK1	930954074375127
KEGG_PATHWAY	hsa04010:MAPK signaling pathway	15	1.42993e+16	55	267	5085	4.20769e+09	3.88042e+09	PRKCA, PRKCG, HSPA1A, NFKB1, DDIT3, ATF2, PRKCB, AKT1, MAPK1, JUN, MAPT, MAPK8, PAK1, MYC, PLA2G5	5194075587334010
SP_PIR_KEYWORDS	ATP	10	0.9532888465204957	78	236	19235	4.22701e+08	9.15848e+09	PRKCA, MAPK1, CDK6, PRKCG, MAPK8, HSPA1A, CDK7, CDK4, PRKCB, DAPK1	1.04493e+16
GOTERM_MF_FAT	GO:0004674~protein serine/threonine kinase activity	14	1334604385128690	75	430	12983	8.00761e+08	9.72878e+10	PRKCA, CDC7, TBK1, PRKCG, CDK6, CDK7, CDK4, DAPK1, PRKCB, AKT1, MAPK1, CCND3, MAPK8, PAK1	5636031007751930
SP_PIR_KEYWORDS	atp-binding	20	1.90658e+16	78	1326	19235	8.10032e+08	1.43596e+11	PRKCA, CDC7, MYO5A, HSP90AA1, TBK1, CDK6, PRKCG, HSPA1A, CDK7, CDK4, DAPK1, PRKCB, AKT1, MAPK1, TOP1, PTK2, PTK2B, MAPK8, PAK1, ABL1	3.7195e+16
GOTERM_BP_FAT	GO:0006468~protein amino acid phosphorylation	17	1.62059e+16	78	667	13528	8.35742e+08	5.2069e+10	PRKCA, CDC7, TBK1, PML, CDK6, PRKCG, CDK7, CDK4, DAPK1, PRKCB, AKT1, MAPK1, PTK2, PTK2B, MAPK8, PAK1, ABL1	4420405182024370
SMART	SM00220:S_TKc	11	1.04862e+16	51	259	9079	1.12722e+10	2.93074e+10	PRKCA, AKT1, MAPK1, CDK6, PRKCG, MAPK8, CDK7, PAK1, CDK4, PRKCB, DAPK1	7560678325384200
UP_SEQ_FEATURE	nucleotide phosphate-binding region:ATP	17	1.62059e+16	78	962	19113	1.1328e+10	4.45181e+09	PRKCA, MYO5A, CDC7, TBK1, CDK6, PRKCG, CDK7, CDK4, DAPK1, PRKCB, AKT1, MAPK1, PTK2, PTK2B, MAPK8, PAK1, ABL1	4330201503278420
SP_PIR_KEYWORDS	phosphotransferase	9	0.8579599618684461	78	201	19235	1.40395e+10	2.28139e+11	PRKCA, MAPK1, CDK6, PRKCG, MAPK8, CDK7, CDK4, PRKCB, DAPK1	1104190585533860
GOTERM_BP_FAT	GO:0016310~phosphorylation	18	1.71592e+16	78	800	13528	1.91156e+10	1.05351e+12	PRKCA, CDC7, TBK1, PML, CDK6, PRKCG, CDK7, CDK4, DAPK1, PRKCB, AKT1, TOP1, MAPK1, PTK2, PTK2B, MAPK8, PAK1, ABL1	3902307692307690
GOTERM_BP_FAT	GO:0006793~phosphorus metabolic process	19	1811248808388940	78	973	13528	6.39655e+08	2.41189e+12	PRKCA, CDC7, TBK1, PML, CDK6, PRKCG, CDK7, CDK4, CDC25C, DAPK1, PRKCB, AKT1, TOP1, MAPK1, PTK2, PTK2B, MAPK8, PAK1, ABL1	3386723588162430
GOTERM_BP_FAT	GO:0006796~phosphate metabolic process	19	1811248808388940	78	973	13528	6.39655e+08	2.41189e+12	PRKCA, CDC7, TBK1, PML, CDK6, PRKCG, CDK7, CDK4, CDC25C, DAPK1, PRKCB, AKT1, TOP1, MAPK1, PTK2, PTK2B, MAPK8, PAK1, ABL1	3386723588162430
SP_PIR_KEYWORDS	transferase	19	1811248808388940	78	1394	19235	7.28058e+09	8.35093e+10	PRKCA, CDC7, KAT2B, TBK1, SUV39H1, HAT1, CDK6, PRKCG, CDK7, CDK4, DAPK1, PRKCB, AKT1, MAPK1, PTK2, PTK2B, MAPK8, PAK1, ABL1	3.36115e+16
SP_PIR_KEYWORDS	nucleotide-binding	20	1.90658e+16	78	1686	19235	2.66212e+11	2.73184e+12	PRKCA, CDC7, MYO5A, HSP90AA1, TBK1, CDK6, PRKCG, HSPA1A, CDK7, CDK4, DAPK1, PRKCB, AKT1, MAPK1, TOP1, PTK2, PTK2B, MAPK8, PAK1, ABL1	2.9253e+16
KEGG_PATHWAY	hsa04510:Focal adhesion	11	1.04862e+16	55	201	5085	3.88916e+10	2.48282e+12	PRKCA, AKT1, MAPK1, PTK2, CCND3, JUN, PRKCG, MAPK8, PAK1, PRKCB, VCL	5059701492537310
GOTERM_MF_FAT	GO:0030554~adenyl nucleotide binding	23	219256434699714	75	1577	12983	4.24412e+11	0.002575039465394946	PRKCA, CDC7, MYO5A, HSP90AA1, NOS1, TBK1, CDK6, PRKCG, HSPA1A, CDK7, CDK4, DAPK1, PRKCB, AKT1, MAPK1, TOP1, PTK2, PTK2B, NOS3, MAPK8, PAK1, NOS2, ABL1	2524700908898750
GOTERM_MF_FAT	GO:0001883~purine nucleoside binding	23	219256434699714	75	1601	12983	5.35294e+11	0.0021656500749663854	PRKCA, CDC7, MYO5A, HSP90AA1, NOS1, TBK1, CDK6, PRKCG, HSPA1A, CDK7, CDK4, DAPK1, PRKCB, AKT1, MAPK1, TOP1, PTK2, PTK2B, NOS3, MAPK8, PAK1, NOS2, ABL1	2486854049552360
GOTERM_MF_FAT	GO:0001882~nucleoside binding	23	219256434699714	75	1612	12983	5.94347e+10	0.0020611683821551985	PRKCA, CDC7, MYO5A, HSP90AA1, NOS1, TBK1, CDK6, PRKCG, HSPA1A, CDK7, CDK4, DAPK1, PRKCB, AKT1, MAPK1, TOP1, PTK2, PTK2B, NOS3, MAPK8, PAK1, NOS2, ABL1	2.46988e+16
PIR_SUPERFAMILY	PIRSF000564:kinase-related transforming protein	5	0.47664442326024786	64	42	7396	4.1988e+12	0.00850300356522693	MAPK1, CDK6, MAPK8, CDK7, CDK4	1.37574e+16
GOTERM_MF_FAT	GO:0005524~ATP binding	20	1.90658e+16	75	1477	12983	4.71994e+12	0.011406616036396366	PRKCA, CDC7, MYO5A, HSP90AA1, TBK1, CDK6, PRKCG, HSPA1A, CDK7, CDK4, DAPK1, PRKCB, AKT1, MAPK1, TOP1, PTK2, PTK2B, MAPK8, PAK1, ABL1	2344030692845850
GOTERM_MF_FAT	GO:0032559~adenyl ribonucleotide binding	20	1.90658e+16	75	1497	12983	5.58808e+11	0.012272113697533893	PRKCA, CDC7, MYO5A, HSP90AA1, TBK1, CDK6, PRKCG, HSPA1A, CDK7, CDK4, DAPK1, PRKCB, AKT1, MAPK1, TOP1, PTK2, PTK2B, MAPK8, PAK1, ABL1	2.31271e+16
GOTERM_MF_FAT	GO:0017076~purine nucleotide binding	23	219256434699714	75	1918	12983	7.43615e+11	0.013808827464027118	PRKCA, CDC7, MYO5A, HSP90AA1, NOS1, TBK1, CDK6, PRKCG, HSPA1A, CDK7, CDK4, DAPK1, PRKCB, AKT1, MAPK1, TOP1, PTK2, PTK2B, NOS3, MAPK8, PAK1, NOS2, ABL1	2075835940215500
GOTERM_BP_FAT	GO:0007243~protein kinase cascade	9	0.8579599618684461	78	370	13528	0.0011789731718310802	0.01676257067974707	PRKCA, AKT1, MAPK1, TBK1, PTK2B, MAPK8, NOS2, PAK1, DAPK1	4218711018711010
KEGG_PATHWAY	hsa04664:Fc epsilon RI signaling pathway	6	0.5719733079122974	55	78	5085	0.0013120827520505748	0.005433901444032108	PRKCA, AKT1, MAPK1, MAPK8, PLA2G5, PRKCB	7111888111888110
KEGG_PATHWAY	hsa04666:Fc gamma R-mediated phagocytosis	6	0.5719733079122974	55	95	5085	0.0031424021727945975	0.009286258205018383	PRKCA, AKT1, MAPK1, PRKCG, PAK1, PRKCB	5839234449760760
GOTERM_BP_FAT	GO:0007242~intracellular signaling cascade	16	1.52526e+16	78	1256	13528	0.004333499356583413	0.04538129047523076	PRKCA, TBK1, PML, PRKCG, RB1, CDK7, DAPK1, PRKCB, AKT1, MAPK1, PTK2B, MAPK8, PAK1, NOS2, ABL1, CCNA2	2.20937e+16
GOTERM_MF_FAT	GO:0000166~nucleotide binding	23	219256434699714	75	2245	12983	0.005734528709260417	0.05436635550407776	PRKCA, CDC7, MYO5A, HSP90AA1, NOS1, TBK1, CDK6, PRKCG, HSPA1A, CDK7, CDK4, DAPK1, PRKCB, AKT1, MAPK1, TOP1, PTK2, PTK2B, NOS3, MAPK8, PAK1, NOS2, ABL1	1.77348e+16
GOTERM_MF_FAT	GO:0032555~purine ribonucleotide binding	20	1.90658e+16	75	1836	12983	0.006094133417137151	0.055529633844612514	PRKCA, CDC7, MYO5A, HSP90AA1, TBK1, CDK6, PRKCG, HSPA1A, CDK7, CDK4, DAPK1, PRKCB, AKT1, MAPK1, TOP1, PTK2, PTK2B, MAPK8, PAK1, ABL1	1.88569e+16
GOTERM_MF_FAT	GO:0032553~ribonucleotide binding	20	1.90658e+16	75	1836	12983	0.006094133417137151	0.055529633844612514	PRKCA, CDC7, MYO5A, HSP90AA1, TBK1, CDK6, PRKCG, HSPA1A, CDK7, CDK4, DAPK1, PRKCB, AKT1, MAPK1, TOP1, PTK2, PTK2B, MAPK8, PAK1, ABL1	1.88569e+16
GOTERM_BP_FAT	GO:0010033~response to organic substance	21	2001906577693040	78	721	13528	218803	2.41188e+09	PRKCA, HSP90AA1, KAT2B, TH, PML, CDH1, HSPA1A, BCL2L1, PRDX3, DDIT3, AKT1, CASP6, MAPK1, KRT19, CDKN1A, PTK2B, JUN, NOS3, MYC, CCNA2, PLA2G5	5051530993278560
GOTERM_BP_FAT	GO:0009719~response to endogenous stimulus	13	1.23928e+16	78	405	13528	2.78787e+09	1.3775e+12	PRKCA, KAT2B, TH, BCL2L1, DDIT3, AKT1, MAPK1, CASP6, CDKN1A, KRT19, PTK2B, NOS3, CCNA2	5567078189300410
GOTERM_BP_FAT	GO:0009725~response to hormone stimulus	12	1.14395e+16	78	367	13528	6.77545e+09	2489240746667	PRKCA, AKT1, CASP6, MAPK1, CDKN1A, KRT19, KAT2B, PTK2B, TH, NOS3, BCL2L1, CCNA2	5670928526514350
GOTERM_BP_FAT	GO:0048545~response to steroid hormone stimulus	8	0.7626310772163966	78	192	13528	1.08087e+12	0.0025360779828725866	PRKCA, CASP6, MAPK1, CDKN1A, KRT19, TH, NOS3, CCNA2	7226495726495720
GOTERM_BP_FAT	GO:0043627~response to estrogen stimulus	6	0.5719733079122974	78	105	13528	3.24649e+11	0.005727943398861957	PRKCA, CASP6, MAPK1, KRT19, NOS3, CCNA2	9910622710622710
KEGG_PATHWAY	hsa05220:Chronic myeloid leukemia	12	1.14395e+16	55	75	5085	1950.22	8.0934e+06	AKT1, MAPK1, CDKN1A, CDKN2A, SMAD4, NFKB1, CDK6, RB1, BCL2L1, ABL1, CDK4, MYC	1.47927e+16
KEGG_PATHWAY	hsa05214:Glioma	11	1.04862e+16	55	63	5085	636105	1.75989e+08	PRKCA, AKT1, MAPK1, CDKN1A, CDKN2A, CDK6, PRKCG, RB1, CDK4, CALM1, PRKCB	1.61429e+16
GOTERM_BP_FAT	GO:0051329~interphase of mitotic cell cycle	10	0.9532888465204957	78	103	13528	6.33484e+06	5.33989e+08	CDC7, AKT1, CDKN1A, CDKN2A, CDK6, RB1, ABL1, CDK4, CDC25C, TERF1	1.68384e+16
KEGG_PATHWAY	hsa05212:Pancreatic cancer	10	0.9532888465204957	55	72	5085	4.38664e+08	6.06818e+08	AKT1, MAPK1, CDKN2A, SMAD4, NFKB1, CDK6, MAPK8, RB1, BCL2L1, CDK4	1.28409e+16
KEGG_PATHWAY	hsa05223:Non-small cell lung cancer	9	0.8579599618684461	55	54	5085	6.76439e+07	8.02063e+08	PRKCA, AKT1, MAPK1, CDKN2A, CDK6, PRKCG, RB1, CDK4, PRKCB	1540909090909090
KEGG_PATHWAY	hsa05219:Bladder cancer	8	0.7626310772163966	55	42	5085	2.06885e+09	2.14643e+09	MAPK1, CDKN1A, CDKN2A, CDH1, RB1, CDK4, MYC, DAPK1	1761038961038960
KEGG_PATHWAY	hsa05222:Small cell lung cancer	9	0.8579599618684461	55	84	5085	2.22143e+09	1.84378e+10	AKT1, PTK2, NFKB1, CDK6, RB1, NOS2, BCL2L1, CDK4, MYC	9905844155844150
BIOCARTA	h_RacCycDPathway:Influence of Ras and Rho proteins on G1 to S Transition	8	0.7626310772163966	45	24	1437	3.62932e+08	5.91405e+11	AKT1, MAPK1, CDKN1A, NFKB1, CDK6, RB1, PAK1, CDK4	1.06444e+16
SP_PIR_KEYWORDS	serine/threonine-specific protein kinase	6	0.5719733079122974	78	60	19235	4.14426e+08	5.0507e+10	PRKCA, MAPK1, CDK6, PRKCG, PRKCB, DAPK1	2466025641025640
KEGG_PATHWAY	hsa05218:Melanoma	8	0.7626310772163966	55	71	5085	8.0523e+09	6.07567e+10	AKT1, MAPK1, CDKN1A, CDKN2A, CDK6, CDH1, RB1, CDK4	1041741357234310
GOTERM_BP_FAT	GO:0000082~G1/S transition of mitotic cell cycle	6	0.5719733079122974	78	56	13528	1.5951e+10	5.19365e+11	CDC7, AKT1, CDKN1A, CDKN2A, RB1, CDK4	1858241758241750
BIOCARTA	h_cellcyclePathway:Cyclins and Cell Cycle Regulation	7	0.667302192564347	45	25	1437	6.66689e+10	0.0027131604038035384	CDKN1A, CDKN2A, CCND3, CDK6, RB1, CDK7, CDK4	8941333333333330
BIOCARTA	h_g1Pathway:Cell Cycle: G1/S Check Point	7	0.667302192564347	45	29	1437	1.63058e+12	0.005302007099903916	CDKN1A, CDKN2A, SMAD4, CDK6, RB1, ABL1, CDK4	7708045977011490
BBID	94.E2F_transcriptional_activity_cell_cycle	5	0.47664442326024786	20	7	358	1.81745e+12	0.009767103044383552	CDKN1A, CDKN2A, CDK6, RB1, CDK4	1.27857e+16
KEGG_PATHWAY	hsa04666:Fc gamma R-mediated phagocytosis	6	0.5719733079122974	55	95	5085	0.0031424021727945975	0.009286258205018383	PRKCA, AKT1, MAPK1, PRKCG, PAK1, PRKCB	5839234449760760
BBID	83.Growth_factors_Survival_factors_Mitogens	3	0.2859866539561487	20	10	358	0.09314115597095166	0.6521206244717428	AKT1, CDK6, CDK4	5.37
BIOCARTA	h_p53Pathway:p53 Signaling Pathway	3	0.2859866539561487	45	17	1437	0.09318133212444764	0.365886971385012	CDKN1A, RB1, CDK4	5635294117647050
UP_SEQ_FEATURE	region of interest:Coil 1B	8	0.7626310772163966	78	70	19113	1.27522e+08	1.2529e+10	INA, KRT19, KRT18, KRT7, KRT13, NEFH, KRT10, KRT4	2.80044e+16
UP_SEQ_FEATURE	region of interest:Coil 1A	8	0.7626310772163966	78	70	19113	1.27522e+08	1.2529e+10	INA, KRT19, KRT18, KRT7, KRT13, NEFH, KRT10, KRT4	2.80044e+16
UP_SEQ_FEATURE	region of interest:Linker 1	8	0.7626310772163966	78	70	19113	1.27522e+08	1.2529e+10	INA, KRT19, KRT18, KRT7, KRT13, NEFH, KRT10, KRT4	2.80044e+16
UP_SEQ_FEATURE	region of interest:Rod	8	0.7626310772163966	78	71	19113	1.41016e+08	1.10839e+10	INA, KRT19, KRT18, KRT7, KRT13, NEFH, KRT10, KRT4	2760996749729140
UP_SEQ_FEATURE	region of interest:Head	8	0.7626310772163966	78	73	19113	1.71664e+08	1.1244e+10	INA, KRT19, KRT18, KRT7, KRT13, NEFH, KRT10, KRT4	2.68535e+16
SP_PIR_KEYWORDS	Intermediate filament	8	0.7626310772163966	78	78	19235	2.62358e+08	7.30855e+08	INA, KRT19, KRT18, KRT7, KRT13, NEFH, KRT10, KRT4	2529257067718600
INTERPRO	IPR018039:Intermediate filament protein, conserved site	8	0.7626310772163966	76	72	16659	3.28368e+08	2.46276e+09	INA, KRT19, KRT18, KRT7, KRT13, NEFH, KRT10, KRT4	2.43553e+16
INTERPRO	IPR016044:Filament	8	0.7626310772163966	76	72	16659	3.28368e+08	2.46276e+09	INA, KRT19, KRT18, KRT7, KRT13, NEFH, KRT10, KRT4	2.43553e+16
UP_SEQ_FEATURE	region of interest:Coil 2	7	0.667302192564347	78	64	19113	2.18387e+09	1.07282e+10	INA, KRT19, KRT18, KRT7, KRT13, KRT10, KRT4	2680108173076920
UP_SEQ_FEATURE	region of interest:Linker 12	7	0.667302192564347	78	64	19113	2.18387e+09	1.07282e+10	KRT19, KRT18, KRT7, KRT13, NEFH, KRT10, KRT4	2680108173076920
UP_SEQ_FEATURE	region of interest:Tail	7	0.667302192564347	78	75	19113	5.66327e+08	2.47293e+11	INA, KRT18, KRT7, KRT13, NEFH, KRT10, KRT4	2287025641025640
INTERPRO	IPR001664:Intermediate filament protein	7	0.667302192564347	76	73	16659	9.10741e+08	2.04915e+09	INA, KRT19, KRT18, KRT7, KRT13, KRT10, KRT4	2.10189e+16
GOTERM_CC_FAT	GO:0044430~cytoskeletal part	17	1.62059e+16	69	952	12782	2.90729e+11	7.77408e+11	INA, MYO5A, KRT13, KRT10, RB1, AKT1, KRT19, EZR, KRT18, PTK2B, MAPT, KRT7, NEFH, KRT4, MYC, CALM1, TERF1	3307971014492750
GOTERM_CC_FAT	GO:0005882~intermediate filament	8	0.7626310772163966	69	183	12782	5.1023e+10	9.92162e+10	INA, KRT19, KRT18, KRT7, KRT13, NEFH, KRT10, KRT4	8098202264987720
GOTERM_CC_FAT	GO:0045111~intermediate filament cytoskeleton	8	0.7626310772163966	69	187	12782	5.85224e+10	0.0010431350403449224	INA, KRT19, KRT18, KRT7, KRT13, NEFH, KRT10, KRT4	7924978687127020
PIR_SUPERFAMILY	PIRSF002282:cytoskeletal keratin	6	0.5719733079122974	64	61	7396	1.57363e+11	0.009553957777346578	KRT19, KRT18, KRT7, KRT13, KRT10, KRT4	1.13668e+16
SP_PIR_KEYWORDS	keratin	6	0.5719733079122974	78	144	19235	2.81074e+11	0.0024885855794950507	KRT19, KRT18, KRT7, KRT13, KRT10, KRT4	1.02751e+16
UP_SEQ_FEATURE	site:Stutter	4	0.3813155386081983	78	33	19113	3.14422e+11	0.010246072699670594	KRT19, KRT18, KRT7, KRT4	297016317016317
INTERPRO	IPR002957:Keratin, type I	4	0.3813155386081983	76	33	16659	4.33928e+12	0.006084846053255988	KRT19, KRT18, KRT13, KRT10	2.65694e+16
GOTERM_MF_FAT	GO:0005198~structural molecule activity	12	1.14395e+16	75	634	12983	8.72465e+11	0.01404059350303033	INA, KRT19, KRT18, KRT7, MAPT, ACAN, KRT13, KRT10, CSTA, KRT4, CTNNA1, VCL	3.27647e+16
GOTERM_CC_FAT	GO:0045095~keratin filament	4	0.3813155386081983	69	88	12782	0.011451964160870274	0.08426728821674867	KRT18, KRT7, KRT10, KRT4	8420289855072460
UP_SEQ_FEATURE	compositionally biased region:Gly-rich	4	0.3813155386081983	78	238	19113	0.07135805002193368	0.5750242445408209	KRT13, NFKB1, KRT10, KRT4	4118293471234640
SP_PIR_KEYWORDS	coiled coil	13	1.23928e+16	78	2019	19235	0.10537161040833422	0.36995938307961274	INA, MYO5A, TBK1, PML, KRT13, CYTH2, KRT10, CYTH3, KRT19, KRT18, KRT7, NEFH, KRT4	1.58783e+16
GOTERM_BP_FAT	GO:0008637~apoptotic mitochondrial changes	6	0.5719733079122974	78	31	13528	7.92729e+08	5.16341e+10	AKT1, CDKN2A, JUN, CASP7, BCL2L1, MYC	3356823821339950
GOTERM_BP_FAT	GO:0007005~mitochondrion organization	9	0.8579599618684461	78	138	13528	1.11319e+10	6.64644e+10	AKT1, CDKN2A, HSP90AA1, JUN, CASP7, NOS3, PRDX3, BCL2L1, MYC	1131103678929760
GOTERM_BP_FAT	GO:0001836~release of cytochrome c from mitochondria	4	0.3813155386081983	78	21	13528	2.19042e+12	0.004291067190343889	JUN, CASP7, BCL2L1, MYC	3303540903540900
GOTERM_BP_FAT	GO:0044092~negative regulation of molecular function	12	1.14395e+16	78	334	13528	2.74957e+10	1.40709e+12	PRKCA, AKT1, CDKN1A, CDKN2A, NOS3, NFKB1, RB1, CSTA, PRDX3, DDIT3, TERF1, CALM1	6231229847996310
GOTERM_BP_FAT	GO:0051338~regulation of transferase activity	12	1.14395e+16	78	372	13528	7.70231e+09	2.75898e+12	PRKCA, AKT1, CDKN1A, CDKN2A, CCND3, PTK2B, RB1, CDK7, PRDX3, PAK1, CDC25C, TERF1	5594706368899910
GOTERM_BP_FAT	GO:0042325~regulation of phosphorylation	13	1.23928e+16	78	466	13528	1.1644e+11	3.97206e+12	PRKCA, SMAD4, PRDX3, CDK7, RB1, CDC25C, AKT1, CDKN1A, CDKN2A, CCND3, PTK2B, JUN, PAK1	4838340486409150
GOTERM_BP_FAT	GO:0000079~regulation of cyclin-dependent protein kinase activity	6	0.5719733079122974	78	54	13528	1.33238e+11	4.43927e+10	AKT1, CDKN1A, CDKN2A, CCND3, CDK7, CDC25C	1.92707e+16
GOTERM_BP_FAT	GO:0051348~negative regulation of transferase activity	7	0.667302192564347	78	96	13528	1.72338e+11	5.48656e+11	PRKCA, AKT1, CDKN1A, CDKN2A, RB1, PRDX3, TERF1	1.26464e+16
GOTERM_BP_FAT	GO:0051174~regulation of phosphorus metabolic process	13	1.23928e+16	78	485	13528	1.73567e+11	5.40557e+10	PRKCA, SMAD4, PRDX3, CDK7, RB1, CDC25C, AKT1, CDKN1A, CDKN2A, CCND3, PTK2B, JUN, PAK1	4648797250859100
GOTERM_BP_FAT	GO:0019220~regulation of phosphate metabolic process	13	1.23928e+16	78	485	13528	1.73567e+11	5.40557e+10	PRKCA, SMAD4, PRDX3, CDK7, RB1, CDC25C, AKT1, CDKN1A, CDKN2A, CCND3, PTK2B, JUN, PAK1	4648797250859100
GOTERM_BP_FAT	GO:0043086~negative regulation of catalytic activity	10	0.9532888465204957	78	277	13528	2.65281e+11	7.60016e+11	PRKCA, AKT1, CDKN1A, CDKN2A, NOS3, NFKB1, RB1, CSTA, PRDX3, TERF1	6261223734147920
GOTERM_BP_FAT	GO:0043549~regulation of kinase activity	11	1.04862e+16	78	357	13528	3.28921e+10	9.06035e+11	PRKCA, AKT1, CDKN1A, CDKN2A, CCND3, PTK2B, RB1, CDK7, PRDX3, PAK1, CDC25C	5343963226316160
GOTERM_BP_FAT	GO:0045859~regulation of protein kinase activity	10	0.9532888465204957	78	345	13528	1.44049e+12	0.003031229890391951	PRKCA, AKT1, CDKN1A, CDKN2A, CCND3, PTK2B, RB1, CDK7, PAK1, CDC25C	502712746191007
GOTERM_BP_FAT	GO:0033673~negative regulation of kinase activity	6	0.5719733079122974	78	90	13528	1.57886e+12	0.0032271899451415953	PRKCA, AKT1, CDKN1A, CDKN2A, RB1, PRDX3	1.15624e+16
GOTERM_BP_FAT	GO:0006469~negative regulation of protein kinase activity	5	0.47664442326024786	78	87	13528	0.0015106632384096973	0.020421150141999966	PRKCA, AKT1, CDKN1A, CDKN2A, RB1	9967580312407890
GOTERM_BP_FAT	GO:0009628~response to abiotic stimulus	14	1334604385128690	78	368	13528	1.3764e+09	1.03809e+11	PRKCA, NOS1, PML, GJA1, BCL2L1, AKT1, CASP6, CDKN1A, PTK2B, CASP7, JUN, NOS3, MAPK8, MYC	6598104793756960
GOTERM_BP_FAT	GO:0010035~response to inorganic substance	11	1.04862e+16	78	205	13528	2.32553e+09	1.66623e+10	PRKCA, CASP6, CDKN1A, PTK2B, JUN, NOS3, MAPK8, PRDX3, BCL2L1, DDIT3, CALM1	9306316447779860
GOTERM_BP_FAT	GO:0034097~response to cytokine stimulus	7	0.667302192564347	78	79	13528	5.57799e+09	2.35069e+11	PRKCA, CASP6, JUN, PML, NOS3, BCL2L1, PLA2G5	1.53677e+16
GOTERM_BP_FAT	GO:0010243~response to organic nitrogen	6	0.5719733079122974	78	63	13528	2.84552e+10	7.99227e+11	CASP6, CDKN1A, PTK2B, NOS3, BCL2L1, DDIT3	1651770451770450
GOTERM_BP_FAT	GO:0014070~response to organic cyclic substance	6	0.5719733079122974	78	121	13528	6.22809e+11	0.009870557240557298	PRKCA, CDKN1A, PTK2B, JUN, NOS3, BCL2L1	8600127145581690
GOTERM_BP_FAT	GO:0042493~response to drug	7	0.667302192564347	78	216	13528	0.0014272934122494757	0.019675439021223373	TOP1, CDKN1A, PTK2B, JUN, NOS3, CDH1, DDIT3	5620607787274450
GOTERM_BP_FAT	GO:0045768~positive regulation of anti-apoptosis	3	0.2859866539561487	78	30	13528	0.012548014632149107	0.10630591997941574	CDKN1A, PTK2B, BCL2L1	1.73436e+16
GOTERM_BP_FAT	GO:0045767~regulation of anti-apoptosis	3	0.2859866539561487	78	38	13528	0.019694398681759113	0.15110033783416887	CDKN1A, PTK2B, BCL2L1	1.36923e+16
GOTERM_BP_FAT	GO:0008285~negative regulation of cell proliferation	12	1.14395e+16	78	361	13528	5.7931e+10	2.30572e+11	PRKCA, CDKN1A, CDKN2A, KAT2B, JUN, PML, SMAD4, GJA1, NOS3, CDK6, RB1, KRT4	5765182186234810
GOTERM_BP_FAT	GO:0000082~G1/S transition of mitotic cell cycle	6	0.5719733079122974	78	56	13528	1.5951e+10	5.19365e+11	CDC7, AKT1, CDKN1A, CDKN2A, RB1, CDK4	1858241758241750
GOTERM_BP_FAT	GO:0008361~regulation of cell size	9	0.8579599618684461	78	206	13528	2.15818e+11	6.44107e+11	AKT1, CDKN1A, CDKN2A, PTK2B, MAPT, PML, SMAD4, RB1, CDK4	757729648991785
GOTERM_BP_FAT	GO:0045786~negative regulation of cell cycle	6	0.5719733079122974	78	81	13528	9.57815e+10	0.0022850761151608223	CDKN1A, CDKN2A, PML, CDK6, RB1, TERF1	1.28471e+16
GOTERM_BP_FAT	GO:0001558~regulation of cell growth	8	0.7626310772163966	78	194	13528	1.15304e+12	0.002661619552853267	AKT1, CDKN1A, CDKN2A, PTK2B, MAPT, PML, SMAD4, RB1	7151995770552470
GOTERM_BP_FAT	GO:0032535~regulation of cellular component size	9	0.8579599618684461	78	271	13528	1.48914e+12	0.0030881253191522573	AKT1, CDKN1A, CDKN2A, PTK2B, MAPT, PML, SMAD4, RB1, CDK4	5759863752483670
BIOCARTA	h_g1Pathway:Cell Cycle: G1/S Check Point	7	0.667302192564347	45	29	1437	1.63058e+12	0.005302007099903916	CDKN1A, CDKN2A, SMAD4, CDK6, RB1, ABL1, CDK4	7708045977011490
BBID	94.E2F_transcriptional_activity_cell_cycle	5	0.47664442326024786	20	7	358	1.81745e+12	0.009767103044383552	CDKN1A, CDKN2A, CDK6, RB1, CDK4	1.27857e+16
GOTERM_BP_FAT	GO:0045792~negative regulation of cell size	6	0.5719733079122974	78	99	13528	2.46926e+11	0.004707408751572273	AKT1, CDKN1A, CDKN2A, PML, SMAD4, RB1	1.05113e+16
GOTERM_BP_FAT	GO:0045926~negative regulation of growth	6	0.5719733079122974	78	110	13528	4.02513e+11	0.006844529429644863	CDKN1A, PTK2, CDKN2A, PML, SMAD4, RB1	946013986013986
GOTERM_BP_FAT	GO:0040008~regulation of growth	9	0.8579599618684461	78	341	13528	6.95559e+10	0.010897140796527705	AKT1, CDKN1A, PTK2, CDKN2A, PTK2B, MAPT, PML, SMAD4, RB1	4577487029099930
GOTERM_BP_FAT	GO:0006469~negative regulation of protein kinase activity	5	0.47664442326024786	78	87	13528	0.0015106632384096973	0.020421150141999966	PRKCA, AKT1, CDKN1A, CDKN2A, RB1	9967580312407890
GOTERM_BP_FAT	GO:0030308~negative regulation of cell growth	5	0.47664442326024786	78	92	13528	0.001856175722957085	0.023699966801163708	CDKN1A, CDKN2A, PML, SMAD4, RB1	9425863991081380
SP_PIR_KEYWORDS	cell cycle control	7	0.667302192564347	78	31	19235	2.29443e+07	8.94826e+07	CDKN2A, CCND3, CDK6, RB1, CDK4, CDC25C, CCNA2	5568444995864350
INTERPRO	IPR013763:Cyclin-related	3	0.2859866539561487	76	37	16659	0.012029995379819292	0.10726462583551732	CCND3, RB1, CCNA2	1777275960170690
INTERPRO	IPR006670:Cyclin	3	0.2859866539561487	76	40	16659	0.013967493775857093	0.11890833714040261	CCND3, RB1, CCNA2	1.64398e+16
SMART	SM00385:CYCLIN	3	0.2859866539561487	51	40	9079	0.020292900296089735	0.19201917354138087	CCND3, RB1, CCNA2	1.33515e+16
SP_PIR_KEYWORDS	Apoptosis	13	1.23928e+16	78	381	19235	3.54085e+08	8.63083e+08	FADD, NFKB1, BCL2L1, DAPK1, AKT1, CASP5, CASP6, CASP10, CDKN2A, CASP4, CASP7, PAK1, DAP	8414260717410320
INTERPRO	IPR002138:Peptidase C14, caspase non-catalytic subunit p10	5	0.47664442326024786	76	12	16659	1.82494e+09	6.84351e+08	CASP5, CASP10, CASP6, CASP4, CASP7	9133223684210520
INTERPRO	IPR016129:Peptidase C14, ICE, catalytic subunit p20, active site	5	0.47664442326024786	76	12	16659	1.82494e+09	6.84351e+08	CASP5, CASP10, CASP6, CASP4, CASP7	9133223684210520
INTERPRO	IPR015917:Peptidase C14, caspase precursor p45, core	5	0.47664442326024786	76	14	16659	3.66533e+08	1.03087e+11	CASP5, CASP10, CASP6, CASP4, CASP7	7828477443609020
INTERPRO	IPR001309:Peptidase C14, ICE, catalytic subunit p20	5	0.47664442326024786	76	15	16659	4.98115e+08	1.24528e+11	CASP5, CASP10, CASP6, CASP4, CASP7	730657894736842
INTERPRO	IPR011600:Peptidase C14, caspase catalytic	5	0.47664442326024786	76	15	16659	4.98115e+08	1.24528e+11	CASP5, CASP10, CASP6, CASP4, CASP7	730657894736842
SMART	SM00115:CASc	5	0.47664442326024786	51	14	9079	7.82409e+08	4.06844e+11	CASP5, CASP10, CASP6, CASP4, CASP7	6357843137254900
INTERPRO	IPR002398:Peptidase C14, caspase precursor p45	5	0.47664442326024786	76	20	16659	1.73813e+10	3.5552e+11	CASP5, CASP10, CASP6, CASP4, CASP7	5479934210526310
INTERPRO	IPR011029:DEATH-like	6	0.5719733079122974	76	67	16659	1.25534e+11	2.3535e+11	CASP5, CASP10, CASP4, NFKB1, FADD, DAPK1	1.96296e+16
GOTERM_MF_FAT	GO:0004197~cysteine-type endopeptidase activity	5	0.47664442326024786	75	72	12983	7.46442e+11	0.012877313312617433	CASP5, CASP10, CASP6, CASP4, CASP7	1.20213e+16
SP_PIR_KEYWORDS	thiol protease	5	0.47664442326024786	78	126	19235	0.0016423842386697556	0.011801228093572647	CASP5, CASP10, CASP6, CASP4, CASP7	9785816035816030
GOTERM_MF_FAT	GO:0008234~cysteine-type peptidase activity	5	0.47664442326024786	75	141	12983	0.008527542898495583	0.07162937363996358	CASP5, CASP10, CASP6, CASP4, CASP7	6138534278959810
SP_PIR_KEYWORDS	zymogen	5	0.47664442326024786	78	206	19235	0.009408722929750864	0.05773062407981555	CASP5, CASP10, CASP6, CASP4, CASP7	5985499128703010
BIOCARTA	h_deathPathway:Induction of apoptosis through DR3 and DR4/5 Death Receptors	5	0.47664442326024786	45	30	1437	0.011725931409612301	0.0874874064524428	CASP10, CASP6, CASP7, NFKB1, FADD	5322222222222220
BIOCARTA	h_caspasePathway:Caspase Cascade in Apoptosis	4	0.3813155386081983	45	24	1437	0.03460738684777605	0.18537963640667732	CASP10, CASP6, CASP4, CASP7	5322222222222220
SP_PIR_KEYWORDS	Protease	5	0.47664442326024786	78	484	19235	0.1290114818927371	0.42286959379309064	CASP5, CASP10, CASP6, CASP4, CASP7	2.54755e+16
GOTERM_MF_FAT	GO:0004175~endopeptidase activity	5	0.47664442326024786	75	375	12983	0.1655319546200914	0.5638147877604551	CASP5, CASP10, CASP6, CASP4, CASP7	2308088888888880
GOTERM_MF_FAT	GO:0070011~peptidase activity, acting on L-amino acid peptides	5	0.47664442326024786	75	549	12983	0.382334224662926	0.8257827357673844	CASP5, CASP10, CASP6, CASP4, CASP7	1.57656e+16
GOTERM_MF_FAT	GO:0008233~peptidase activity	5	0.47664442326024786	75	574	12983	0.414881501672323	0.8526877119440155	CASP5, CASP10, CASP6, CASP4, CASP7	1507897793263640
GOTERM_BP_FAT	GO:0006508~proteolysis	7	0.667302192564347	78	1054	13528	0.56118261939695	0.9656910239032357	CASP5, CASP10, CASP6, CASP4, CASP7, ACAN, NFKB1	1.15185e+16
SP_PIR_KEYWORDS	hydrolase	7	0.667302192564347	78	1555	19235	0.5981001627232022	0.943129542171892	CASP5, CASP10, CASP6, CASP4, CASP7, CDC25C, PLA2G5	1.11011e+16
GOTERM_BP_FAT	GO:0043549~regulation of kinase activity	11	1.04862e+16	78	357	13528	3.28921e+10	9.06035e+11	PRKCA, AKT1, CDKN1A, CDKN2A, CCND3, PTK2B, RB1, CDK7, PRDX3, PAK1, CDC25C	5343963226316160
GOTERM_MF_FAT	GO:0019899~enzyme binding	13	1.23928e+16	75	523	12983	3.61339e+10	0.002922615677006135	KAT2B, PML, CDH1, RB1, PRDX3, AKT1, MAPK1, CDKN2A, CCND3, PTK2B, MAPT, PAK1, CSTA	4302842574888460
GOTERM_MF_FAT	GO:0019900~kinase binding	6	0.5719733079122974	75	179	12983	0.0035221415493741177	0.0400059120322529	MAPK1, CDKN2A, CCND3, PTK2B, RB1, PRDX3	580245810055866
GOTERM_MF_FAT	GO:0019901~protein kinase binding	5	0.47664442326024786	75	147	12983	0.00983839987051408	0.07950823025230869	MAPK1, CDKN2A, CCND3, PTK2B, PRDX3	5887981859410430
UP_SEQ_FEATURE	compositionally biased region:Gln/Pro-rich (transactivation domain)	3	0.2859866539561487	78	4	19113	9.56193e+10	0.0034105500038396075	TFAP2B, TFAP2A, TFAP2C	1.83779e+16
INTERPRO	IPR004979:Transcription factor AP-2	3	0.2859866539561487	76	5	16659	1.98249e+12	0.0031813834246346984	TFAP2B, TFAP2A, TFAP2C	1.31518e+16
INTERPRO	IPR013854:Transcription factor AP-2, C-terminal	3	0.2859866539561487	76	5	16659	1.98249e+12	0.0031813834246346984	TFAP2B, TFAP2A, TFAP2C	1.31518e+16
SP_PIR_KEYWORDS	isopeptide bond	8	0.7626310772163966	78	319	19235	2.87682e+11	0.002436421138098721	TOP1, MAPT, PML, SMAD4, TFAP2B, TFAP2A, TFAP2C, CALM1	6184390322321350
UP_SEQ_FEATURE	cross-link:Glycyl lysine isopeptide (Lys-Gly) (interchain with G-Cter in SUMO)	5	0.47664442326024786	78	89	19113	4.58692e+12	0.012796511202668115	TOP1, PML, TFAP2B, TFAP2A, TFAP2C	1376620570440790
PIR_SUPERFAMILY	PIRSF005097:transcription factor AP-2	3	0.2859866539561487	64	5	7396	7.02451e+11	0.010658923770614837	TFAP2B, TFAP2A, TFAP2C	6933749999999990
SP_PIR_KEYWORDS	activator	7	0.667302192564347	78	520	19235	0.017867193154733497	0.09303885366015607	PML, TFAP2B, TFAP2A, NFKB1, TFAP2C, MYC, ATF2	3.31965e+16
GOTERM_BP_FAT	GO:0034097~response to cytokine stimulus	7	0.667302192564347	78	79	13528	5.57799e+09	2.35069e+11	PRKCA, CASP6, JUN, PML, NOS3, BCL2L1, PLA2G5	1.53677e+16
GOTERM_BP_FAT	GO:0007568~aging	7	0.667302192564347	78	110	13528	3.73882e+11	9.91699e+11	PRKCA, CDKN2A, JUN, PML, NOS3, DDIT3, TERF1	1.10368e+16
GOTERM_BP_FAT	GO:0014070~response to organic cyclic substance	6	0.5719733079122974	78	121	13528	6.22809e+11	0.009870557240557298	PRKCA, CDKN1A, PTK2B, JUN, NOS3, BCL2L1	8600127145581690
GOTERM_BP_FAT	GO:0048660~regulation of smooth muscle cell proliferation	3	0.2859866539561487	78	46	13528	0.028162625850741238	0.1938244897959317	PRKCA, JUN, NOS3	1131103678929760
GOTERM_BP_FAT	GO:0048511~rhythmic process	4	0.3813155386081983	78	128	13528	0.036470919944525074	0.23069247170758844	JUN, NOS3, BCL2L1, CDK4	5419871794871790
GOTERM_BP_FAT	GO:0008637~apoptotic mitochondrial changes	6	0.5719733079122974	78	31	13528	7.92729e+08	5.16341e+10	AKT1, CDKN2A, JUN, CASP7, BCL2L1, MYC	3356823821339950
GOTERM_BP_FAT	GO:0006916~anti-apoptosis	7	0.667302192564347	78	206	13528	0.0011192574231580236	0.016242101633673567	AKT1, NOS3, NFKB1, HSPA1A, BCL2L1, MYC, DAPK1	5893452825491660
GOTERM_BP_FAT	GO:0045884~regulation of survival gene product expression	3	0.2859866539561487	78	21	13528	0.00626098335651785	0.06099870185851164	AKT1, BCL2L1, MYC	2.47766e+16
KEGG_PATHWAY	hsa04630:Jak-STAT signaling pathway	4	0.3813155386081983	55	155	5085	0.22658538076679116	0.32627030355240216	AKT1, CCND3, BCL2L1, MYC	2385923753665680
BIOCARTA	h_RacCycDPathway:Influence of Ras and Rho proteins on G1 to S Transition	8	0.7626310772163966	45	24	1437	3.62932e+08	5.91405e+11	AKT1, MAPK1, CDKN1A, NFKB1, CDK6, RB1, PAK1, CDK4	1.06444e+16
KEGG_PATHWAY	hsa05215:Prostate cancer	6	0.5719733079122974	55	89	5085	0.0023619932654829067	0.00782035407524495	AKT1, MAPK1, CDKN1A, HSP90AA1, NFKB1, RB1	6232890704800810
BIOCARTA	h_hcmvPathway:Human Cytomegalovirus and Map Kinase Pathways	4	0.3813155386081983	45	14	1437	0.007704505667170416	0.07147563689180736	AKT1, MAPK1, NFKB1, RB1	9123809523809520
GOTERM_BP_FAT	GO:0019216~regulation of lipid metabolic process	3	0.2859866539561487	78	112	13528	0.1335241315262007	0.5274248378291663	AKT1, NFKB1, RB1	4645604395604390
GOTERM_BP_FAT	GO:0051301~cell division	11	1.04862e+16	78	295	13528	6.30156e+09	2.44029e+11	CDC7, TOP1, CDKN2A, CCND3, CDK6, RB1, CDK7, CDK4, CDC25C, CCNA2, TERF1	6467101260321590
GOTERM_BP_FAT	GO:0007050~cell cycle arrest	7	0.667302192564347	78	103	13528	2.57572e+11	7.52991e+11	CDKN1A, CDKN2A, KAT2B, PML, RB1, MYC, DDIT3	1.17869e+16
GOTERM_BP_FAT	GO:0045786~negative regulation of cell cycle	6	0.5719733079122974	78	81	13528	9.57815e+10	0.0022850761151608223	CDKN1A, CDKN2A, PML, CDK6, RB1, TERF1	1.28471e+16
GOTERM_BP_FAT	GO:0052547~regulation of peptidase activity	6	0.5719733079122974	78	86	13528	1.27344e+12	0.0028036930111355884	CDKN2A, PML, CDH1, CSTA, MYC, TERF1	1.21002e+16
GOTERM_BP_FAT	GO:0007346~regulation of mitotic cell cycle	7	0.667302192564347	78	152	13528	2.2407e+11	0.0043301737363616866	CDKN2A, PML, RB1, CDC25C, CCNA2, MYC, TERF1	7987179487179480
GOTERM_BP_FAT	GO:0044093~positive regulation of molecular function	12	1.14395e+16	78	586	13528	4.5546e+12	0.007475623571860823	AKT1, CDKN2A, CCND3, PTK2B, PML, NOS3, PRDX3, PAK1, ABL1, MYC, TERF1, CALM1	3.55159e+16
GOTERM_BP_FAT	GO:0010564~regulation of cell cycle process	6	0.5719733079122974	78	114	13528	4.7435e+12	0.007696419537324362	CDC7, CDKN2A, PML, RB1, CDC25C, TERF1	912820512820513
GOTERM_BP_FAT	GO:0043281~regulation of caspase activity	5	0.47664442326024786	78	79	13528	0.001055266718514173	0.015476876233970316	CDKN2A, PML, CDH1, MYC, TERF1	1.0977e+16
GOTERM_BP_FAT	GO:0052548~regulation of endopeptidase activity	5	0.47664442326024786	78	82	13528	0.0012127424173395854	0.017069610312083983	CDKN2A, PML, CDH1, MYC, TERF1	1.05754e+16
GOTERM_BP_FAT	GO:0000075~cell cycle checkpoint	5	0.47664442326024786	78	91	13528	0.0017830860015565953	0.02318966884786311	CDKN2A, PML, RB1, CCNA2, TERF1	9529444914060290
GOTERM_BP_FAT	GO:0006259~DNA metabolic process	10	0.9532888465204957	78	506	13528	0.0022456868898754765	0.027625907079149248	CDC7, TOP1, CDKN2A, KRT7, PML, CDK7, ABL1, CDC25C, MYC, TERF1	3.42759e+16
GOTERM_BP_FAT	GO:0043085~positive regulation of catalytic activity	10	0.9532888465204957	78	520	13528	0.002698683959165541	0.031755215985598606	AKT1, CDKN2A, CCND3, PTK2B, PML, NOS3, PAK1, ABL1, MYC, TERF1	3.33531e+16
GOTERM_BP_FAT	GO:0051336~regulation of hydrolase activity	8	0.7626310772163966	78	337	13528	0.0030216330852218154	0.03464227493770744	CDKN2A, PTK2B, PML, NOS3, CDH1, CSTA, MYC, TERF1	4.11717e+16
GOTERM_BP_FAT	GO:0006919~activation of caspase activity	4	0.3813155386081983	78	54	13528	0.003570353462407824	0.039554506063867456	CDKN2A, PML, MYC, TERF1	1284710351377010
GOTERM_BP_FAT	GO:0010952~positive regulation of peptidase activity	4	0.3813155386081983	78	59	13528	0.004585327877822352	0.047613498920219266	CDKN2A, PML, MYC, TERF1	1.17584e+16
GOTERM_BP_FAT	GO:0043280~positive regulation of caspase activity	4	0.3813155386081983	78	59	13528	0.004585327877822352	0.047613498920219266	CDKN2A, PML, MYC, TERF1	1.17584e+16
GOTERM_BP_FAT	GO:0033044~regulation of chromosome organization	3	0.2859866539561487	78	30	13528	0.012548014632149107	0.10630591997941574	PML, MYC, TERF1	1.73436e+16
GOTERM_BP_FAT	GO:0007569~cell aging	3	0.2859866539561487	78	33	13528	0.015064429634586683	0.12350804733013854	CDKN2A, PML, TERF1	1.57669e+16
GOTERM_BP_FAT	GO:0051345~positive regulation of hydrolase activity	5	0.47664442326024786	78	179	13528	0.01897968899549044	0.14835096427656025	CDKN2A, PTK2B, PML, MYC, TERF1	4844578140667520
GOTERM_BP_FAT	GO:0006260~DNA replication	5	0.47664442326024786	78	190	13528	0.02304579728627081	0.16771268142463136	CDC7, TOP1, KRT7, CDC25C, TERF1	4564102564102560
GOTERM_BP_FAT	GO:0007093~mitotic cell cycle checkpoint	3	0.2859866539561487	78	43	13528	0.024840530809880194	0.17531985825038632	PML, CCNA2, TERF1	1.21002e+16
GOTERM_BP_FAT	GO:0033043~regulation of organelle organization	5	0.47664442326024786	78	217	13528	0.03514260190094356	0.2251240639584432	MAPT, PML, CDC25C, MYC, TERF1	3.99622e+16
GOTERM_BP_FAT	GO:0006997~nucleus organization	3	0.2859866539561487	78	52	13528	0.03530321849722683	0.22506082171076258	CDKN2A, PML, MYC	1.00059e+16
BIOCARTA	h_fasPathway:FAS signaling pathway ( CD95 )	8	0.7626310772163966	45	31	1437	2.34725e+09	0.0012745390296741155	CASP10, CASP6, JUN, CASP7, MAPK8, FADD, RB1, PAK1	8240860215053760
KEGG_PATHWAY	hsa04210:Apoptosis	7	0.667302192564347	55	87	5085	2.81961e+11	0.0014618101151254725	AKT1, CASP10, CASP6, CASP7, NFKB1, FADD, BCL2L1	7438871473354230
BIOCARTA	h_chemicalPathway:Apoptotic Signaling in Response to DNA Damage	6	0.5719733079122974	45	22	1437	3.8186e+12	0.010322205814872754	PRKCA, AKT1, CASP6, PTK2, CASP7, BCL2L1	8709090909090900
BIOCARTA	h_HivnefPathway:HIV-I Nef: negative effector of Fas and TNF	7	0.667302192564347	45	53	1437	0.004528994875259802	0.05147791907502208	CASP6, PTK2, CASP7, NFKB1, MAPK8, FADD, RB1	4217610062893080
BBID	72.IAP_interaction_with_cell_death_pathways	5	0.47664442326024786	20	15	358	0.005371061652326768	0.13533187558110693	CASP6, CASP7, NFKB1, FADD, BCL2L1	5966666666666660
BIOCARTA	h_deathPathway:Induction of apoptosis through DR3 and DR4/5 Death Receptors	5	0.47664442326024786	45	30	1437	0.011725931409612301	0.0874874064524428	CASP10, CASP6, CASP7, NFKB1, FADD	5322222222222220
BIOCARTA	h_mitochondriaPathway:Role of Mitochondria in Apoptotic Signaling	3	0.2859866539561487	45	22	1437	0.1439292804404808	0.4691439206729354	CASP6, CASP7, BCL2L1	4.35455e+16
KEGG_PATHWAY	hsa05214:Glioma	11	1.04862e+16	55	63	5085	636105	1.75989e+08	PRKCA, AKT1, MAPK1, CDKN1A, CDKN2A, CDK6, PRKCG, RB1, CDK4, CALM1, PRKCB	1.61429e+16
KEGG_PATHWAY	hsa04012:ErbB signaling pathway	12	1.14395e+16	55	87	5085	1.01458e+06	2.10524e+07	PRKCA, AKT1, MAPK1, CDKN1A, PTK2, JUN, PRKCG, MAPK8, PAK1, ABL1, MYC, PRKCB	1.27524e+16
KEGG_PATHWAY	hsa05223:Non-small cell lung cancer	9	0.8579599618684461	55	54	5085	6.76439e+07	8.02063e+08	PRKCA, AKT1, MAPK1, CDKN2A, CDK6, PRKCG, RB1, CDK4, PRKCB	1540909090909090
INTERPRO	IPR002290:Serine/threonine protein kinase	11	1.04862e+16	76	259	16659	2.36687e+09	7.60776e+09	PRKCA, AKT1, MAPK1, CDK6, PRKCG, MAPK8, CDK7, PAK1, CDK4, PRKCB, DAPK1	930954074375127
KEGG_PATHWAY	hsa04010:MAPK signaling pathway	15	1.42993e+16	55	267	5085	4.20769e+09	3.88042e+09	PRKCA, PRKCG, HSPA1A, NFKB1, DDIT3, ATF2, PRKCB, AKT1, MAPK1, JUN, MAPT, MAPK8, PAK1, MYC, PLA2G5	5194075587334010
SMART	SM00220:S_TKc	11	1.04862e+16	51	259	9079	1.12722e+10	2.93074e+10	PRKCA, AKT1, MAPK1, CDK6, PRKCG, MAPK8, CDK7, PAK1, CDK4, PRKCB, DAPK1	7560678325384200
SP_PIR_KEYWORDS	serine/threonine-specific protein kinase	6	0.5719733079122974	78	60	19235	4.14426e+08	5.0507e+10	PRKCA, MAPK1, CDK6, PRKCG, PRKCB, DAPK1	2466025641025640
KEGG_PATHWAY	hsa04370:VEGF signaling pathway	8	0.7626310772163966	55	75	5085	1.16323e+11	8.04542e+10	PRKCA, AKT1, MAPK1, PTK2, NOS3, PRKCG, PLA2G5, PRKCB	9861818181818180
KEGG_PATHWAY	hsa04510:Focal adhesion	11	1.04862e+16	55	201	5085	3.88916e+10	2.48282e+12	PRKCA, AKT1, MAPK1, PTK2, CCND3, JUN, PRKCG, MAPK8, PAK1, PRKCB, VCL	5059701492537310
INTERPRO	IPR014375:Protein kinase C, alpha/beta/gamma types	3	0.2859866539561487	76	3	16659	5.98235e+11	0.001034901585862169	PRKCA, PRKCG, PRKCB	2191973684210520
PIR_SUPERFAMILY	PIRSF000550:PKC_alpha	3	0.2859866539561487	64	3	7396	2.1307e+12	0.006478266077118322	PRKCA, PRKCG, PRKCB	1155625
KEGG_PATHWAY	hsa04670:Leukocyte transendothelial migration	8	0.7626310772163966	55	118	5085	2.17585e+08	0.001203375903992332	PRKCA, PTK2, EZR, PTK2B, PRKCG, CTNNA1, PRKCB, VCL	6268104776579350
SP_PIR_KEYWORDS	duplication	7	0.667302192564347	78	228	19235	3.05297e+11	0.0024778384706065637	PRKCA, MAPT, NFKB1, CDH1, CALM1, PRKCB, VCL	7.57113e+16
INTERPRO	IPR015745:Protein kinase C	3	0.2859866539561487	76	9	16659	7.05403e+11	0.008781858385759844	PRKCA, PRKCG, PRKCB	730657894736842
KEGG_PATHWAY	hsa04730:Long-term depression	6	0.5719733079122974	55	69	5085	7.50808e+11	0.0034573682567892172	PRKCA, MAPK1, NOS1, PRKCG, PLA2G5, PRKCB	8039525691699600
INTERPRO	IPR017892:Protein kinase, C-terminal	4	0.3813155386081983	76	40	16659	7.68217e+11	0.009059520113351982	PRKCA, AKT1, PRKCG, PRKCB	2.19197e+16
KEGG_PATHWAY	hsa04310:Wnt signaling pathway	8	0.7626310772163966	55	151	5085	9.72302e+10	0.00424047473233391	PRKCA, CCND3, JUN, SMAD4, PRKCG, MAPK8, MYC, PRKCB	4898254063816970
KEGG_PATHWAY	hsa04664:Fc epsilon RI signaling pathway	6	0.5719733079122974	55	78	5085	0.0013120827520505748	0.005433901444032108	PRKCA, AKT1, MAPK1, MAPK8, PLA2G5, PRKCB	7111888111888110
UP_SEQ_FEATURE	domain:AGC-kinase C-terminal	4	0.3813155386081983	78	55	19113	0.0014187491001654464	0.03228865080904808	PRKCA, AKT1, PRKCG, PRKCB	1782097902097900
INTERPRO	IPR000961:AGC-kinase, C-terminal	4	0.3813155386081983	76	55	16659	0.0019436375645318657	0.02062919798820939	PRKCA, AKT1, PRKCG, PRKCB	1.59416e+16
KEGG_PATHWAY	hsa04020:Calcium signaling pathway	8	0.7626310772163966	55	176	5085	0.0023645704455844694	0.007528889765521907	PRKCA, NOS1, PTK2B, NOS3, PRKCG, NOS2, CALM1, PRKCB	4202479338842970
KEGG_PATHWAY	hsa04666:Fc gamma R-mediated phagocytosis	6	0.5719733079122974	55	95	5085	0.0031424021727945975	0.009286258205018383	PRKCA, AKT1, MAPK1, PRKCG, PAK1, PRKCB	5839234449760760
UP_SEQ_FEATURE	metal ion-binding site:Calcium 3; via carbonyl oxygen	3	0.2859866539561487	78	21	19113	0.003201313587071224	0.06417132713224927	PRKCA, PRKCG, PRKCB	3.50055e+16
GOTERM_MF_FAT	GO:0004697~protein kinase C activity	3	0.2859866539561487	75	15	12983	0.003207474160387886	0.03828145505671221	PRKCA, PRKCG, PRKCB	3462133333333330
SMART	SM00133:S_TK_X	4	0.3813155386081983	51	55	9079	0.003371588822028438	0.056859122128664064	PRKCA, AKT1, PRKCG, PRKCB	1.29469e+16
UP_SEQ_FEATURE	zinc finger region:Phorbol-ester/DAG-type 2	3	0.2859866539561487	78	22	19113	0.0035122827075540464	0.06680196288331652	PRKCA, PRKCG, PRKCB	3341433566433560
UP_SEQ_FEATURE	zinc finger region:Phorbol-ester/DAG-type 1	3	0.2859866539561487	78	22	19113	0.0035122827075540464	0.06680196288331652	PRKCA, PRKCG, PRKCB	3341433566433560
KEGG_PATHWAY	hsa04720:Long-term potentiation	5	0.47664442326024786	55	68	5085	0.0055978022885583385	0.01445460453482239	PRKCA, MAPK1, PRKCG, CALM1, PRKCB	679812834224599
KEGG_PATHWAY	hsa04270:Vascular smooth muscle contraction	6	0.5719733079122974	55	112	5085	0.006350785077831668	0.015896420374739262	PRKCA, MAPK1, PRKCG, PLA2G5, CALM1, PRKCB	4952922077922070
UP_SEQ_FEATURE	metal ion-binding site:Calcium 3	3	0.2859866539561487	78	30	19113	0.006477796228431039	0.11451669554563049	PRKCA, PRKCG, PRKCB	2.45038e+16
UP_SEQ_FEATURE	metal ion-binding site:Calcium 1; via carbonyl oxygen	3	0.2859866539561487	78	32	19113	0.007347899213909446	0.12343535025783492	PRKCA, PRKCG, PRKCB	2297235576923070
SP_PIR_KEYWORDS	calcium binding	4	0.3813155386081983	78	103	19235	0.008188954497483478	0.052044143865391024	PRKCA, CDH1, CALM1, PRKCB	957679860592482
KEGG_PATHWAY	hsa04960:Aldosterone-regulated sodium reabsorption	4	0.3813155386081983	55	41	5085	0.009077619066447613	0.020248485381345938	PRKCA, MAPK1, PRKCG, PRKCB	9019955654101990
UP_SEQ_FEATURE	metal ion-binding site:Calcium 2; via carbonyl oxygen	3	0.2859866539561487	78	39	19113	0.010779845694872996	0.15665500986950598	PRKCA, PRKCG, PRKCB	1.88491e+16
KEGG_PATHWAY	hsa04650:Natural killer cell mediated cytotoxicity	6	0.5719733079122974	55	133	5085	0.012867705490136935	0.027891808486334324	PRKCA, MAPK1, PTK2B, PRKCG, PAK1, PRKCB	4170881749829110
KEGG_PATHWAY	hsa04530:Tight junction	6	0.5719733079122974	55	134	5085	0.013260383520691194	0.028009838373020624	PRKCA, AKT1, PRKCG, CDK4, CTNNA1, PRKCB	4.13976e+16
UP_SEQ_FEATURE	metal ion-binding site:Calcium 1	3	0.2859866539561487	78	45	19113	0.014180197515332066	0.19416264195929112	PRKCA, PRKCG, PRKCB	1.63359e+16
KEGG_PATHWAY	hsa04540:Gap junction	5	0.47664442326024786	55	89	5085	0.014250835922810116	0.028638700974004783	PRKCA, MAPK1, GJA1, PRKCG, PRKCB	5194075587334010
SP_PIR_KEYWORDS	autophosphorylation	3	0.2859866539561487	78	49	19235	0.01647294600386117	0.08838923540955568	PRKCA, PRKCG, PRKCB	1509811616954470
KEGG_PATHWAY	hsa04916:Melanogenesis	5	0.47664442326024786	55	99	5085	0.020330942572542244	0.03977904842616842	PRKCA, MAPK1, PRKCG, CALM1, PRKCB	4669421487603300
UP_SEQ_FEATURE	metal ion-binding site:Calcium 2	3	0.2859866539561487	78	55	19113	0.0207279011703889	0.25471487555456696	PRKCA, PRKCG, PRKCB	1.33657e+16
INTERPRO	IPR002219:Protein kinase C-like, phorbol ester/diacylglycerol binding	3	0.2859866539561487	76	67	16659	0.0366335243876367	0.251408963526342	PRKCA, PRKCG, PRKCB	9814807541241160
UP_SEQ_FEATURE	domain:C2	3	0.2859866539561487	78	80	19113	0.041363829985450865	0.4146472392170044	PRKCA, PRKCG, PRKCB	9188942307692300
SP_PIR_KEYWORDS	calcium	8	0.7626310772163966	78	803	19235	0.04154717321224283	0.18276180895032945	PRKCA, NOS3, CDH1, PRKCG, NOS2, PLA2G5, CALM1, PRKCB	2456812593798890
KEGG_PATHWAY	hsa04070:Phosphatidylinositol signaling system	4	0.3813155386081983	55	74	5085	0.04324294403001217	0.075096180664329	PRKCA, PRKCG, CALM1, PRKCB	4997542997542990
SMART	SM00109:C1	3	0.2859866539561487	51	67	9079	0.05238574212602281	0.2951360287151016	PRKCA, PRKCG, PRKCB	7971027216856890
GOTERM_MF_FAT	GO:0019992~diacylglycerol binding	3	0.2859866539561487	75	68	12983	0.05736466328941981	0.2731311334584722	PRKCA, PRKCG, PRKCB	7.63706e+16
INTERPRO	IPR018029:C2 membrane targeting protein	3	0.2859866539561487	76	106	16659	0.08252508867321733	0.4648121200985261	PRKCA, PRKCG, PRKCB	6203699106256200
KEGG_PATHWAY	hsa05110:Vibrio cholerae infection	3	0.2859866539561487	55	56	5085	0.11867593303282235	0.19264140118958328	PRKCA, PRKCG, PRKCB	4952922077922070
INTERPRO	IPR000008:C2 calcium-dependent membrane targeting	3	0.2859866539561487	76	137	16659	0.12663221978014627	0.6027429737144934	PRKCA, PRKCG, PRKCB	4799942374183630
SMART	SM00239:C2	3	0.2859866539561487	51	137	9079	0.17401797484121773	0.6299613385643502	PRKCA, PRKCG, PRKCB	3.89824e+16
GOTERM_MF_FAT	GO:0008289~lipid binding	5	0.47664442326024786	75	450	12983	0.2543848360659464	0.7015074083366332	PRKCA, AKT1, PRKCG, CYTH3, PRKCB	1.92341e+16
GOTERM_MF_FAT	GO:0005509~calcium ion binding	8	0.7626310772163966	75	919	12983	0.26860496057	0.7182813215484128	PRKCA, NOS3, CDH1, PRKCG, NOS2, PLA2G5, CALM1, PRKCB	1.50691e+16
GOTERM_BP_FAT	GO:0007610~behavior	5	0.47664442326024786	78	469	13528	0.27764424292524076	0.7722649996470494	PRKCA, MAPK1, JUN, TH, PRKCG	1.849e+16
GOTERM_BP_FAT	GO:0048584~positive regulation of response to stimulus	3	0.2859866539561487	78	236	13528	0.38981959043398284	0.881428317060849	PRKCA, MAPK1, PRKCG	2.20469e+16
SP_PIR_KEYWORDS	zinc	8	0.7626310772163966	78	2189	19235	0.7876269790008612	0.9910925002969716	PRKCA, CDKN1A, PML, NOS3, PRKCG, NOS2, PRKCB, ATF2	0.9012428107905494
SP_PIR_KEYWORDS	zinc-finger	6	0.5719733079122974	78	1718	19235	0.8288479556428823	0.9949864393500751	PRKCA, CDKN1A, PML, PRKCG, PRKCB, ATF2	0.8612429479717024
INTERPRO	IPR011029:DEATH-like	6	0.5719733079122974	76	67	16659	1.25534e+11	2.3535e+11	CASP5, CASP10, CASP4, NFKB1, FADD, DAPK1	1.96296e+16
UP_SEQ_FEATURE	domain:Death	3	0.2859866539561487	78	35	19113	0.008746136220591531	0.13937999858307926	NFKB1, FADD, DAPK1	2.10033e+16
INTERPRO	IPR000488:Death	3	0.2859866539561487	76	34	16659	0.010221749451690632	0.09562388479027173	NFKB1, FADD, DAPK1	1934094427244580
SMART	SM00005:DEATH	3	0.2859866539561487	51	34	9079	0.01490383520412688	0.17733661643240783	NFKB1, FADD, DAPK1	1.57076e+16
GOTERM_CC_FAT	GO:0042995~cell projection	14	1334604385128690	69	697	12782	6.53953e+10	0.001075962896281979	MYO5A, NOS1, SNCB, TH, CDK6, PRKCG, CYTH3, AKT1, MAPK1, PTK2, EZR, PTK2B, MAPT, NEFH	3.72087e+16
GOTERM_CC_FAT	GO:0043005~neuron projection	9	0.8579599618684461	69	342	12782	4.41733e+11	0.005892051184208658	MYO5A, MAPK1, NOS1, SNCB, PTK2B, MAPT, TH, NEFH, PRKCG	4.8749e+16
GOTERM_CC_FAT	GO:0030424~axon	6	0.5719733079122974	69	159	12782	0.0015510842580828664	0.017331717234725152	MAPK1, SNCB, PTK2B, MAPT, TH, NEFH	6990429313645060
GOTERM_CC_FAT	GO:0033267~axon part	3	0.2859866539561487	69	54	12782	0.03341412130433274	0.18292362878306767	MAPK1, SNCB, TH	1.02915e+16
GOTERM_CC_FAT	GO:0044463~cell projection part	5	0.47664442326024786	69	234	12782	0.035866312567683474	0.18591882128914317	MAPK1, EZR, NOS1, SNCB, TH	3958255914777650
GOTERM_BP_FAT	GO:0032268~regulation of cellular protein metabolic process	14	1334604385128690	78	474	13528	2.41192e+10	1.28002e+12	PRKCA, SMAD4, PML, NFKB1, PRKCG, CDK4, AKT1, MAPK1, CDKN2A, CCND3, PTK2B, KRT7, JUN, PAK1	5122579249161520
KEGG_PATHWAY	hsa04370:VEGF signaling pathway	8	0.7626310772163966	55	75	5085	1.16323e+11	8.04542e+10	PRKCA, AKT1, MAPK1, PTK2, NOS3, PRKCG, PLA2G5, PRKCB	9861818181818180
GOTERM_BP_FAT	GO:0051247~positive regulation of protein metabolic process	9	0.8579599618684461	78	243	13528	6.98362e+10	0.0016948133153402711	PRKCA, AKT1, MAPK1, CCND3, PTK2B, PML, SMAD4, GJA1, CDK4	642355175688509
GOTERM_BP_FAT	GO:0006417~regulation of translation	7	0.667302192564347	78	137	13528	1.27077e+12	0.0028414595602526127	PRKCA, AKT1, MAPK1, PTK2B, KRT7, PML, CDK4	8861688190155340
GOTERM_BP_FAT	GO:0010608~posttranscriptional regulation of gene expression	8	0.7626310772163966	78	211	13528	1.93934e+11	0.0038527524306564143	PRKCA, AKT1, MAPK1, CDKN2A, PTK2B, KRT7, PML, CDK4	6575768623161980
GOTERM_BP_FAT	GO:0032270~positive regulation of cellular protein metabolic process	8	0.7626310772163966	78	233	13528	3.54888e+11	0.006109505514041991	PRKCA, AKT1, MAPK1, CCND3, PTK2B, PML, SMAD4, CDK4	5.95488e+16
KEGG_PATHWAY	hsa04664:Fc epsilon RI signaling pathway	6	0.5719733079122974	55	78	5085	0.0013120827520505748	0.005433901444032108	PRKCA, AKT1, MAPK1, MAPK8, PLA2G5, PRKCB	7111888111888110
KEGG_PATHWAY	hsa04666:Fc gamma R-mediated phagocytosis	6	0.5719733079122974	55	95	5085	0.0031424021727945975	0.009286258205018383	PRKCA, AKT1, MAPK1, PRKCG, PAK1, PRKCB	5839234449760760
GOTERM_BP_FAT	GO:0045727~positive regulation of translation	3	0.2859866539561487	78	23	13528	0.007487777787378506	0.07064803638075012	MAPK1, PTK2B, CDK4	2262207357859530
GOTERM_BP_FAT	GO:0030030~cell projection organization	7	0.667302192564347	78	368	13528	0.01826784065112194	0.14472362487751778	PRKCA, AKT1, PTK2, PTK2B, GJA1, CDH1, VCL	3299052396878480
GOTERM_BP_FAT	GO:0040012~regulation of locomotion	5	0.47664442326024786	78	192	13528	0.02383782422273405	0.17045912621460013	PRKCA, AKT1, MAPK1, PTK2B, VCL	4516559829059820
BIOCARTA	h_edg1Pathway:Phospholipids as signalling intermediaries	4	0.3813155386081983	45	23	1437	0.030931358262109066	0.17277842105690666	PRKCA, AKT1, MAPK1, PTK2	5553623188405790
GOTERM_BP_FAT	GO:0030334~regulation of cell migration	4	0.3813155386081983	78	169	13528	0.07174743512030654	0.36491426392457116	AKT1, MAPK1, PTK2B, VCL	4104991655287510
GOTERM_BP_FAT	GO:0051270~regulation of cell motion	4	0.3813155386081983	78	193	13528	0.09745273851103213	0.4431083748532243	AKT1, MAPK1, PTK2B, VCL	3594526371728440
BIOCARTA	h_crebPathway:Transcription factor CREB and its extracellular signals	3	0.2859866539561487	45	18	1437	0.10284725279846604	0.3882281435485512	PRKCA, AKT1, MAPK1	5322222222222220
BIOCARTA	h_eif4Pathway:Regulation of eIF4e and p70 S6 Kinase	3	0.2859866539561487	45	24	1437	0.16560767826600536	0.5131457187306161	PRKCA, AKT1, MAPK1	3991666666666660
GOTERM_BP_FAT	GO:0007010~cytoskeleton organization	12	1.14395e+16	78	436	13528	3.37555e+10	9.12271e+11	INA, KRT19, PTK2, EZR, PTK2B, KRT7, MAPT, NEFH, CYTH2, KRT4, PAK1, ABL1	4773465067043040
GOTERM_BP_FAT	GO:0030029~actin filament-based process	6	0.5719733079122974	78	241	13528	0.01202744050748259	0.10393796106730158	MYO5A, KRT19, EZR, PTK2B, CYTH2, ABL1	4317906160229810
GOTERM_BP_FAT	GO:0030036~actin cytoskeleton organization	5	0.47664442326024786	78	226	13528	0.0398590577632902	0.2454112326954241	KRT19, EZR, PTK2B, CYTH2, ABL1	3.83708e+16
GOTERM_BP_FAT	GO:0006809~nitric oxide biosynthetic process	4	0.3813155386081983	78	12	13528	3.75946e+11	9.79049e+10	AKT1, NOS1, NOS3, NOS2	5.7812e+16
GOTERM_BP_FAT	GO:0046209~nitric oxide metabolic process	4	0.3813155386081983	78	13	13528	4.86728e+11	0.0012018609991164553	AKT1, NOS1, NOS3, NOS2	5336489151873760
GOTERM_BP_FAT	GO:0051051~negative regulation of transport	6	0.5719733079122974	78	135	13528	0.0010212114878299663	0.015135782738563308	PRKCA, AKT1, NOS1, NOS3, NFKB1, CALM1	7708262108262100
GOTERM_BP_FAT	GO:0010959~regulation of metal ion transport	5	0.47664442326024786	78	81	13528	0.0011585379531382047	0.0166392780734812	AKT1, NOS1, GJA1, NOS3, CALM1	1.07059e+16
GOTERM_BP_FAT	GO:0043269~regulation of ion transport	5	0.47664442326024786	78	99	13528	0.0024269477796702104	0.02932255408647577	AKT1, NOS1, GJA1, NOS3, CALM1	8759388759388750
GOTERM_BP_FAT	GO:0009408~response to heat	4	0.3813155386081983	78	56	13528	0.0039577866965999535	0.04277188267848364	AKT1, CASP6, NOS1, NOS3	1.23883e+16
GOTERM_BP_FAT	GO:0051924~regulation of calcium ion transport	4	0.3813155386081983	78	69	13528	0.007096339283617124	0.06751234420361685	NOS1, GJA1, NOS3, CALM1	1005425492382010
GOTERM_BP_FAT	GO:0009266~response to temperature stimulus	4	0.3813155386081983	78	83	13528	0.011759540909530151	0.10296653017609347	AKT1, CASP6, NOS1, NOS3	8358356502934810
GOTERM_BP_FAT	GO:0044271~nitrogen compound biosynthetic process	5	0.47664442326024786	78	325	13528	0.11395721565820044	0.4814597386521534	AKT1, NOS1, TH, NOS3, NOS2	2668244575936880
GOTERM_BP_FAT	GO:0051240~positive regulation of multicellular organismal process	3	0.2859866539561487	78	244	13528	0.40589580320847907	0.8921867732340383	AKT1, NOS1, NOS3	2132408575031520
GOTERM_BP_FAT	GO:0001558~regulation of cell growth	8	0.7626310772163966	78	194	13528	1.15304e+12	0.002661619552853267	AKT1, CDKN1A, CDKN2A, PTK2B, MAPT, PML, SMAD4, RB1	7151995770552470
GOTERM_BP_FAT	GO:0045793~positive regulation of cell size	4	0.3813155386081983	78	48	13528	0.0025511506767506922	0.030544720900093303	AKT1, PTK2B, MAPT, CDK4	1.4453e+16
GOTERM_BP_FAT	GO:0030307~positive regulation of cell growth	3	0.2859866539561487	78	42	13528	0.023771564053402885	0.17086305337979635	AKT1, PTK2B, MAPT	1.23883e+16
GOTERM_BP_FAT	GO:0045927~positive regulation of growth	3	0.2859866539561487	78	80	13528	0.076056159953593	0.3776750849186472	AKT1, PTK2B, MAPT	6503846153846150
GOTERM_BP_FAT	GO:0010035~response to inorganic substance	11	1.04862e+16	78	205	13528	2.32553e+09	1.66623e+10	PRKCA, CASP6, CDKN1A, PTK2B, JUN, NOS3, MAPK8, PRDX3, BCL2L1, DDIT3, CALM1	9306316447779860
GOTERM_BP_FAT	GO:0000302~response to reactive oxygen species	7	0.667302192564347	78	75	13528	4.11416e+10	1.96501e+11	PRKCA, CASP6, PTK2B, JUN, PRDX3, BCL2L1, DDIT3	1.61874e+16
GOTERM_BP_FAT	GO:0042542~response to hydrogen peroxide	6	0.5719733079122974	78	56	13528	1.5951e+10	5.19365e+11	CASP6, PTK2B, JUN, PRDX3, BCL2L1, DDIT3	1858241758241750
GOTERM_BP_FAT	GO:0008284~positive regulation of cell proliferation	12	1.14395e+16	78	414	13528	2.09632e+10	6.38958e+11	PRKCA, CDC7, MAPK1, CDKN1A, PTK2B, JUN, CDK6, PRDX3, BCL2L1, CDK4, CCNA2, MYC	502712746191007
GOTERM_BP_FAT	GO:0006979~response to oxidative stress	8	0.7626310772163966	78	164	13528	3.99342e+10	0.0010213851212719227	PRKCA, CASP6, PTK2B, JUN, PML, PRDX3, BCL2L1, DDIT3	8460287679799870
KEGG_PATHWAY	hsa04912:GnRH signaling pathway	8	0.7626310772163966	55	98	5085	6.72131e+10	3.98411e+12	PRKCA, MAPK1, PTK2B, JUN, MAPK8, PLA2G5, CALM1, PRKCB	7547309833024110
GOTERM_BP_FAT	GO:0001836~release of cytochrome c from mitochondria	4	0.3813155386081983	78	21	13528	2.19042e+12	0.004291067190343889	JUN, CASP7, BCL2L1, MYC	3303540903540900
GOTERM_BP_FAT	GO:0014070~response to organic cyclic substance	6	0.5719733079122974	78	121	13528	6.22809e+11	0.009870557240557298	PRKCA, CDKN1A, PTK2B, JUN, NOS3, BCL2L1	8600127145581690
GOTERM_BP_FAT	GO:0043523~regulation of neuron apoptosis	5	0.47664442326024786	78	90	13528	0.0017120197454748632	0.022478930627784388	CASP6, SNCB, JUN, PRDX3, BCL2L1	9635327635327630
BIOCARTA	h_biopeptidesPathway:Bioactive Peptide Induced Signaling Pathway	6	0.5719733079122974	45	30	1437	0.00172047123146651	0.02767759093496358	PRKCA, MAPK1, PTK2B, MAPT, MAPK8, PRKCB	6386666666666660
GOTERM_BP_FAT	GO:0042592~homeostatic process	12	1.14395e+16	78	751	13528	0.003352924730589561	0.03747663496639919	PRKCA, AKT1, JMJD6, PTK2B, JUN, RB1, PRDX3, BCL2L1, MYC, DDIT3, TERF1, PRKCB	2771279319881180
GOTERM_BP_FAT	GO:0009612~response to mechanical stimulus	4	0.3813155386081983	78	56	13528	0.0039577866965999535	0.04277188267848364	PRKCA, PTK2B, JUN, MYC	1.23883e+16
BIOCARTA	h_Ccr5Pathway:Pertussis toxin-insensitive CCR5 Signaling in Macrophage	4	0.3813155386081983	45	14	1437	0.007704505667170416	0.07147563689180736	PRKCA, PTK2B, JUN, MAPK8	9123809523809520
BIOCARTA	h_ionPathway:Ion Channel and Phorbal Esters Signaling Pathway	3	0.2859866539561487	45	5	1437	0.008643461783667893	0.06830560479110348	PRKCA, PTK2B, PRKCB	19.16
KEGG_PATHWAY	hsa04650:Natural killer cell mediated cytotoxicity	6	0.5719733079122974	55	133	5085	0.012867705490136935	0.027891808486334324	PRKCA, MAPK1, PTK2B, PRKCG, PAK1, PRKCB	4170881749829110
GOTERM_BP_FAT	GO:0019725~cellular homeostasis	8	0.7626310772163966	78	466	13528	0.01663877448591346	0.13409127428438017	PRKCA, PTK2B, JUN, PRDX3, BCL2L1, MYC, DDIT3, PRKCB	2.97744e+16
GOTERM_BP_FAT	GO:0006873~cellular ion homeostasis	7	0.667302192564347	78	374	13528	0.019614717133173414	0.15133260720466324	PRKCA, PTK2B, JUN, PRDX3, BCL2L1, MYC, PRKCB	3246126422597010
GOTERM_BP_FAT	GO:0055082~cellular chemical homeostasis	7	0.667302192564347	78	380	13528	0.02102821595196629	0.1564519329069174	PRKCA, PTK2B, JUN, PRDX3, BCL2L1, MYC, PRKCB	3194871794871790
GOTERM_BP_FAT	GO:0050801~ion homeostasis	7	0.667302192564347	78	409	13528	0.028841681458622658	0.19713599664475512	PRKCA, PTK2B, JUN, PRDX3, BCL2L1, MYC, PRKCB	296834054291267
GOTERM_BP_FAT	GO:0048878~chemical homeostasis	7	0.667302192564347	78	512	13528	0.07112610776701564	0.3647755944463805	PRKCA, PTK2B, JUN, PRDX3, BCL2L1, MYC, PRKCB	237119391025641
GOTERM_BP_FAT	GO:0030005~cellular di-, tri-valent inorganic cation homeostasis	4	0.3813155386081983	78	227	13528	0.1392006206308176	0.5382141699506058	PRKCA, PTK2B, MYC, PRKCB	3056139161866030
GOTERM_BP_FAT	GO:0055066~di-, tri-valent inorganic cation homeostasis	4	0.3813155386081983	78	239	13528	0.15519156400455753	0.5717125971887169	PRKCA, PTK2B, MYC, PRKCB	2902692844115430
GOTERM_BP_FAT	GO:0030003~cellular cation homeostasis	4	0.3813155386081983	78	254	13528	0.17594709505392916	0.613146305342515	PRKCA, PTK2B, MYC, PRKCB	2.73127e+16
GOTERM_BP_FAT	GO:0042391~regulation of membrane potential	3	0.2859866539561487	78	134	13528	0.1771938481406093	0.614753739088034	JUN, PRDX3, BCL2L1	3882893226176800
GOTERM_BP_FAT	GO:0055080~cation homeostasis	4	0.3813155386081983	78	286	13528	0.22252431495784417	0.6935164032723438	PRKCA, PTK2B, MYC, PRKCB	2425676887215340
GOTERM_BP_FAT	GO:0006874~cellular calcium ion homeostasis	3	0.2859866539561487	78	183	13528	0.27967481908689895	0.7740984354169602	PRKCA, PTK2B, PRKCB	2.84321e+16
GOTERM_BP_FAT	GO:0055074~calcium ion homeostasis	3	0.2859866539561487	78	188	13528	0.290234025095504	0.7866552747026041	PRKCA, PTK2B, PRKCB	276759410801964
GOTERM_BP_FAT	GO:0006875~cellular metal ion homeostasis	3	0.2859866539561487	78	196	13528	0.30709230011741495	0.8055772263523157	PRKCA, PTK2B, PRKCB	2654631083202510
GOTERM_BP_FAT	GO:0055065~metal ion homeostasis	3	0.2859866539561487	78	205	13528	0.32597204975441696	0.8262503410805427	PRKCA, PTK2B, PRKCB	2538086303939960
GOTERM_BP_FAT	GO:0032268~regulation of cellular protein metabolic process	14	1334604385128690	78	474	13528	2.41192e+10	1.28002e+12	PRKCA, SMAD4, PML, NFKB1, PRKCG, CDK4, AKT1, MAPK1, CDKN2A, CCND3, PTK2B, KRT7, JUN, PAK1	5122579249161520
GOTERM_BP_FAT	GO:0031399~regulation of protein modification process	9	0.8579599618684461	78	295	13528	2.655e+12	0.004805032331200998	PRKCA, CDKN2A, CCND3, PTK2B, JUN, PML, SMAD4, PRKCG, PAK1	5291264667535850
GOTERM_BP_FAT	GO:0032270~positive regulation of cellular protein metabolic process	8	0.7626310772163966	78	233	13528	3.54888e+11	0.006109505514041991	PRKCA, AKT1, MAPK1, CCND3, PTK2B, PML, SMAD4, CDK4	5.95488e+16
KEGG_PATHWAY	hsa04310:Wnt signaling pathway	8	0.7626310772163966	55	151	5085	9.72302e+10	0.00424047473233391	PRKCA, CCND3, JUN, SMAD4, PRKCG, MAPK8, MYC, PRKCB	4898254063816970
GOTERM_BP_FAT	GO:0001932~regulation of protein amino acid phosphorylation	6	0.5719733079122974	78	173	13528	0.0030361698550717396	0.03425900116580005	PRKCA, CCND3, PTK2B, JUN, SMAD4, PAK1	6015117830146730
GOTERM_BP_FAT	GO:0031401~positive regulation of protein modification process	4	0.3813155386081983	78	187	13528	0.09070886881890351	0.4227335069498185	PRKCA, CCND3, PML, SMAD4	3709858768682290
GOTERM_BP_FAT	GO:0001934~positive regulation of protein amino acid phosphorylation	3	0.2859866539561487	78	89	13528	0.09126870493467704	0.42223371170063206	PRKCA, CCND3, SMAD4	5846153846153840
GOTERM_BP_FAT	GO:0042327~positive regulation of phosphorylation	3	0.2859866539561487	78	97	13528	0.10546903538294052	0.4641446540623493	PRKCA, CCND3, SMAD4	5363996827914350
GOTERM_BP_FAT	GO:0045937~positive regulation of phosphate metabolic process	3	0.2859866539561487	78	100	13528	0.1109408369066674	0.4756662500597919	PRKCA, CCND3, SMAD4	5203076923076920
GOTERM_BP_FAT	GO:0010562~positive regulation of phosphorus metabolic process	3	0.2859866539561487	78	100	13528	0.1109408369066674	0.4756662500597919	PRKCA, CCND3, SMAD4	5203076923076920
GOTERM_BP_FAT	GO:0070482~response to oxygen levels	9	0.8579599618684461	78	141	13528	1.3101e+10	7.50922e+09	CDKN1A, NOS1, PTK2B, TH, PML, SMAD4, NOS3, NOS2, BCL2L1	1107037643207850
GOTERM_BP_FAT	GO:0001666~response to hypoxia	8	0.7626310772163966	78	134	13528	1.07993e+11	3.7738e+12	NOS1, PTK2B, TH, PML, SMAD4, NOS3, NOS2, BCL2L1	1.03544e+16
GOTERM_BP_FAT	GO:0006809~nitric oxide biosynthetic process	4	0.3813155386081983	78	12	13528	3.75946e+11	9.79049e+10	AKT1, NOS1, NOS3, NOS2	5.7812e+16
GOTERM_BP_FAT	GO:0046209~nitric oxide metabolic process	4	0.3813155386081983	78	13	13528	4.86728e+11	0.0012018609991164553	AKT1, NOS1, NOS3, NOS2	5336489151873760
INTERPRO	IPR004030:Nitric oxide synthase, oxygenase region	3	0.2859866539561487	76	3	16659	5.98235e+11	0.001034901585862169	NOS1, NOS3, NOS2	2191973684210520
INTERPRO	IPR012144:Nitric-oxide synthase	3	0.2859866539561487	76	3	16659	5.98235e+11	0.001034901585862169	NOS1, NOS3, NOS2	2191973684210520
GOTERM_MF_FAT	GO:0004517~nitric-oxide synthase activity	3	0.2859866539561487	75	3	12983	9.57966e+10	0.002905732645525405	NOS1, NOS3, NOS2	1.73107e+16
GOTERM_MF_FAT	GO:0034617~tetrahydrobiopterin binding	3	0.2859866539561487	75	3	12983	9.57966e+10	0.002905732645525405	NOS1, NOS3, NOS2	1.73107e+16
GOTERM_MF_FAT	GO:0034618~arginine binding	3	0.2859866539561487	75	3	12983	9.57966e+10	0.002905732645525405	NOS1, NOS3, NOS2	1.73107e+16
PIR_SUPERFAMILY	PIRSF000333:NOS	3	0.2859866539561487	64	3	7396	2.1307e+12	0.006478266077118322	NOS1, NOS3, NOS2	1155625
PIR_SUPERFAMILY	PIRSF000333:nitric-oxide synthase, inducible	3	0.2859866539561487	64	3	7396	2.1307e+12	0.006478266077118322	NOS1, NOS3, NOS2	1155625
INTERPRO	IPR003097:FAD-binding, type 1	3	0.2859866539561487	76	6	16659	2.96505e+12	0.004438355318884923	NOS1, NOS3, NOS2	1095986842105260
UP_SEQ_FEATURE	domain:Flavodoxin-like	3	0.2859866539561487	78	8	19113	4.41576e+11	0.013263399523403052	NOS1, NOS3, NOS2	9188942307692300
INTERPRO	IPR008254:Flavodoxin/nitric oxide synthase	3	0.2859866539561487	76	8	16659	5.50251e+11	0.007258271005506467	NOS1, NOS3, NOS2	8219901315789470
INTERPRO	IPR001094:Flavodoxin-like	3	0.2859866539561487	76	8	16659	5.50251e+11	0.007258271005506467	NOS1, NOS3, NOS2	8219901315789470
INTERPRO	IPR001709:Flavoprotein pyridine nucleotide cytochrome reductase	3	0.2859866539561487	76	9	16659	7.05403e+11	0.008781858385759844	NOS1, NOS3, NOS2	730657894736842
GOTERM_BP_FAT	GO:0006527~arginine catabolic process	3	0.2859866539561487	78	8	13528	8.75764e+11	0.013409485443147351	NOS1, NOS3, NOS2	6503846153846150
UP_SEQ_FEATURE	nucleotide phosphate-binding region:FMN	3	0.2859866539561487	78	13	19113	0.0012141350967848554	0.029399485636961042	NOS1, NOS3, NOS2	5654733727810650
INTERPRO	IPR001433:Oxidoreductase FAD/NAD(P)-binding	3	0.2859866539561487	76	12	16659	0.0012819652315526069	0.014327728113416094	NOS1, NOS3, NOS2	5479934210526310
SP_PIR_KEYWORDS	calmodulin-binding	5	0.47664442326024786	78	120	19235	0.0013724733154765684	0.010247750445497306	MYO5A, NOS1, NOS3, NOS2, DAPK1	1.02751e+16
UP_SEQ_FEATURE	region of interest:Calmodulin-binding	4	0.3813155386081983	78	55	19113	0.0014187491001654464	0.03228865080904808	NOS1, NOS3, NOS2, DAPK1	1782097902097900
SP_PIR_KEYWORDS	fmn	3	0.2859866539561487	78	16	19235	0.0018303170987041622	0.012677485849793668	NOS1, NOS3, NOS2	4.6238e+16
GOTERM_MF_FAT	GO:0010181~FMN binding	3	0.2859866539561487	75	12	12983	0.002038556190574272	0.028747791625654884	NOS1, NOS3, NOS2	4.32767e+16
KEGG_PATHWAY	hsa04020:Calcium signaling pathway	8	0.7626310772163966	55	176	5085	0.0023645704455844694	0.007528889765521907	PRKCA, NOS1, PTK2B, NOS3, PRKCG, NOS2, CALM1, PRKCB	4202479338842970
GOTERM_BP_FAT	GO:0006525~arginine metabolic process	3	0.2859866539561487	78	13	13528	0.0023950135043790204	0.02918772632390565	NOS1, NOS3, NOS2	4.00237e+16
UP_SEQ_FEATURE	domain:FAD-binding FR-type	3	0.2859866539561487	78	19	19113	0.002620407954551221	0.0556773030429869	NOS1, NOS3, NOS2	3869028340080970
COG_ONTOLOGY	Inorganic ion transport and metabolism	3	0.2859866539561487	7	27	1950	0.002677137883827339	0.01066562582935715	NOS1, NOS3, NOS2	3095238095238090
INTERPRO	IPR017927:Ferredoxin reductase-type FAD-binding domain	3	0.2859866539561487	76	19	16659	0.0032543983108375267	0.03278831255003367	NOS1, NOS3, NOS2	346101108033241
GOTERM_MF_FAT	GO:0016597~amino acid binding	4	0.3813155386081983	75	60	12983	0.004819515352508359	0.0477384671208505	NOS1, TH, NOS3, NOS2	1.15404e+16
GOTERM_BP_FAT	GO:0009065~glutamine family amino acid catabolic process	3	0.2859866539561487	78	20	13528	0.005685560393483859	0.0563009112153684	NOS1, NOS3, NOS2	2.60154e+16
GOTERM_MF_FAT	GO:0005516~calmodulin binding	5	0.47664442326024786	75	140	12983	0.008320885134793402	0.07244322412855309	MYO5A, NOS1, NOS3, NOS2, DAPK1	6182380952380950
GOTERM_BP_FAT	GO:0008016~regulation of heart contraction	4	0.3813155386081983	78	77	13528	0.00959194064363783	0.0863172588883866	PRKCA, NOS1, TH, NOS2	9009657009657000
GOTERM_MF_FAT	GO:0050661~NADP or NADPH binding	3	0.2859866539561487	75	36	12983	0.017817575707796053	0.12761296521912568	NOS1, NOS3, NOS2	1.44256e+16
GOTERM_MF_FAT	GO:0043176~amine binding	4	0.3813155386081983	75	110	12983	0.02484286603009303	0.15617271249483455	NOS1, TH, NOS3, NOS2	629478787878788
UP_SEQ_FEATURE	nucleotide phosphate-binding region:FAD	3	0.2859866539561487	78	61	19113	0.02515159051794639	0.29192630446176615	NOS1, NOS3, NOS2	1.20511e+16
SP_PIR_KEYWORDS	iron	5	0.47664442326024786	78	285	19235	0.02748426053204346	0.13007223140882884	NOS1, JMJD6, TH, NOS3, NOS2	4326360773729190
UP_SEQ_FEATURE	nucleotide phosphate-binding region:NADP	3	0.2859866539561487	78	72	19113	0.03415053115285814	0.365672216863659	NOS1, NOS3, NOS2	1.02099e+16
GOTERM_BP_FAT	GO:0009064~glutamine family amino acid metabolic process	3	0.2859866539561487	78	52	13528	0.03530321849722683	0.22506082171076258	NOS1, NOS3, NOS2	1.00059e+16
GOTERM_MF_FAT	GO:0031406~carboxylic acid binding	4	0.3813155386081983	75	144	12983	0.04897776204625481	0.25214489787521766	NOS1, TH, NOS3, NOS2	4808518518518510
GOTERM_BP_FAT	GO:0009063~cellular amino acid catabolic process	3	0.2859866539561487	78	68	13528	0.0572420185440863	0.31414870158396824	NOS1, NOS3, NOS2	765158371040724
UP_SEQ_FEATURE	metal ion-binding site:Iron (heme axial ligand)	3	0.2859866539561487	78	98	19113	0.059422592893397005	0.5178821734035266	NOS1, NOS3, NOS2	7501177394034530
GOTERM_MF_FAT	GO:0050660~FAD binding	3	0.2859866539561487	75	72	12983	0.06344530444023369	0.2926721674207111	NOS1, NOS3, NOS2	7212777777777770
GOTERM_BP_FAT	GO:0009310~amine catabolic process	3	0.2859866539561487	78	78	13528	0.07279717553412834	0.3668232775124014	NOS1, NOS3, NOS2	667061143984221
SP_PIR_KEYWORDS	oxidoreductase	6	0.5719733079122974	78	562	19235	0.07465938617328341	0.29663333206490416	NOS1, JMJD6, TH, NOS3, NOS2, PRDX3	2.63277e+16
SP_PIR_KEYWORDS	FAD	3	0.2859866539561487	78	114	19235	0.07648131532022405	0.2971517540629761	NOS1, NOS3, NOS2	6.48954e+16
SP_PIR_KEYWORDS	heme	3	0.2859866539561487	78	121	19235	0.08470285623418365	0.3128417603240423	NOS1, NOS3, NOS2	6114113159567700
GOTERM_MF_FAT	GO:0005506~iron ion binding	5	0.47664442326024786	75	308	12983	0.09876267233956584	0.3967207724252766	NOS1, JMJD6, TH, NOS3, NOS2	281017316017316
GOTERM_BP_FAT	GO:0044057~regulation of system process	5	0.47664442326024786	78	309	13528	0.09936341292145293	0.4484995670902837	PRKCA, NOS1, TH, NOS3, NOS2	2806406107376980
KEGG_PATHWAY	hsa00330:Arginine and proline metabolism	3	0.2859866539561487	55	53	5085	0.10830696933637285	0.17981073409973547	NOS1, NOS3, NOS2	523327615780446
GOTERM_BP_FAT	GO:0044271~nitrogen compound biosynthetic process	5	0.47664442326024786	78	325	13528	0.11395721565820044	0.4814597386521534	AKT1, NOS1, TH, NOS3, NOS2	2668244575936880
SP_PIR_KEYWORDS	nadp	3	0.2859866539561487	78	156	19235	0.12925470685082358	0.4171249998112805	NOS1, NOS3, NOS2	4742357001972380
GOTERM_BP_FAT	GO:0016054~organic acid catabolic process	3	0.2859866539561487	78	111	13528	0.1316033235570748	0.5232107880890446	NOS1, NOS3, NOS2	4687456687456680
GOTERM_BP_FAT	GO:0046395~carboxylic acid catabolic process	3	0.2859866539561487	78	111	13528	0.1316033235570748	0.5232107880890446	NOS1, NOS3, NOS2	4687456687456680
GOTERM_MF_FAT	GO:0020037~heme binding	3	0.2859866539561487	75	121	12983	0.15139649553086687	0.5356642265176342	NOS1, NOS3, NOS2	4291900826446280
GOTERM_MF_FAT	GO:0046906~tetrapyrrole binding	3	0.2859866539561487	75	129	12983	0.16740272392736125	0.5615122795878118	NOS1, NOS3, NOS2	4025736434108520
GOTERM_MF_FAT	GO:0050662~coenzyme binding	3	0.2859866539561487	75	181	12983	0.27597905192707867	0.7179572634459758	NOS1, NOS3, NOS2	2869171270718230
GOTERM_BP_FAT	GO:0055114~oxidation reduction	6	0.5719733079122974	78	639	13528	0.2986970450323143	0.7958514389234859	NOS1, JMJD6, TH, NOS3, NOS2, PRDX3	1.62851e+16
GOTERM_MF_FAT	GO:0009055~electron carrier activity	3	0.2859866539561487	75	221	12983	0.3598584203832904	0.8064720967049792	NOS1, NOS3, NOS2	2.34986e+16
GOTERM_MF_FAT	GO:0048037~cofactor binding	3	0.2859866539561487	75	249	12983	0.41657952858804415	0.8500838335164371	NOS1, NOS3, NOS2	2.08562e+16
GOTERM_BP_FAT	GO:0010604~positive regulation of macromolecule metabolic process	18	1.71592e+16	78	857	13528	4.84995e+09	2.17164e+12	PRKCA, SMAD4, PML, GJA1, PRKCG, NFKB1, RB1, CDK7, CDK4, DDIT3, AKT1, MAPK1, CCND3, PTK2B, JUN, TFAP2B, MYC, CCNA2	3.64276e+16
GOTERM_MF_FAT	GO:0046983~protein dimerization activity	13	1.23928e+16	75	542	12983	5.11189e+10	0.0024813586933545295	HSP90AA1, SMAD4, PML, NFKB1, BCL2L1, DDIT3, ATF2, JUN, TFAP2B, TFAP2A, NOS2, TFAP2C, TERF1	41520049200492
GOTERM_BP_FAT	GO:0031328~positive regulation of cellular biosynthetic process	14	1334604385128690	78	685	13528	1.17509e+12	0.00266946232494214	HSP90AA1, SMAD4, NFKB1, RB1, CDK7, CDK4, DDIT3, AKT1, MAPK1, PTK2B, JUN, TFAP2B, MYC, CCNA2	3.54468e+16
GOTERM_BP_FAT	GO:0009891~positive regulation of biosynthetic process	14	1334604385128690	78	695	13528	1.35814e+12	0.0029446721286033872	HSP90AA1, SMAD4, NFKB1, RB1, CDK7, CDK4, DDIT3, AKT1, MAPK1, PTK2B, JUN, TFAP2B, MYC, CCNA2	3493672754104400
GOTERM_BP_FAT	GO:0051173~positive regulation of nitrogen compound metabolic process	13	1.23928e+16	78	644	13528	2.62155e+12	0.0048053108501874275	HSP90AA1, SMAD4, PRKCG, NFKB1, RB1, CDK7, DDIT3, AKT1, MAPK1, JUN, TFAP2B, MYC, CCNA2	3.50104e+16
GOTERM_BP_FAT	GO:0010557~positive regulation of macromolecule biosynthetic process	13	1.23928e+16	78	654	13528	3018493411072	0.00539309726939996	SMAD4, NFKB1, RB1, CDK7, CDK4, DDIT3, AKT1, MAPK1, PTK2B, JUN, TFAP2B, MYC, CCNA2	3.4475e+16
GOTERM_MF_FAT	GO:0003713~transcription coactivator activity	7	0.667302192564347	75	214	12983	0.0013632855626187366	0.02050586137916821	KAT2B, PML, TFAP2B, TFAP2A, RB1, CDK7, ATF2	5662367601246100
GOTERM_MF_FAT	GO:0016563~transcription activator activity	9	0.8579599618684461	75	410	12983	0.0022522471560744825	0.029981007977751606	KAT2B, PML, SMAD4, TFAP2B, TFAP2A, CDH1, RB1, CDK7, ATF2	379990243902439
GOTERM_MF_FAT	GO:0008134~transcription factor binding	10	0.9532888465204957	75	513	12983	0.0024623820017889457	0.03103947611750235	CDKN2A, KAT2B, JUN, PML, TFAP2B, TFAP2A, RB1, CDK7, DDIT3, ATF2	3.3744e+16
GOTERM_BP_FAT	GO:0045935~positive regulation of nucleobase, nucleoside, nucleotide and nucleic acid metabolic process	11	1.04862e+16	78	624	13528	0.002735289325733976	0.03191786786081763	MAPK1, JUN, SMAD4, TFAP2B, NFKB1, PRKCG, RB1, CDK7, CCNA2, MYC, DDIT3	3057363576594340
GOTERM_MF_FAT	GO:0003712~transcription cofactor activity	8	0.7626310772163966	75	363	12983	0.004548506202209951	0.047024020496923336	KAT2B, PML, TFAP2B, TFAP2A, RB1, CDK7, DDIT3, ATF2	3815022956841130
GOTERM_BP_FAT	GO:0045941~positive regulation of transcription	10	0.9532888465204957	78	564	13528	0.0046123433998738125	0.047205508069877444	MAPK1, JUN, SMAD4, TFAP2B, NFKB1, RB1, CDK7, CCNA2, MYC, DDIT3	3.0751e+16
GOTERM_BP_FAT	GO:0010628~positive regulation of gene expression	10	0.9532888465204957	78	581	13528	0.0055869870828657835	0.055733791429135704	MAPK1, JUN, SMAD4, TFAP2B, NFKB1, RB1, CDK7, CCNA2, MYC, DDIT3	298512732247672
SP_PIR_KEYWORDS	nucleus	28	2669208770257380	78	4283	19235	0.006975575781195176	0.045978520167484827	PML, HAT1, NFKB1, BCL2L1, ATF2, AKT1, TOP1, CDKN2A, CCNA2, MYC, TERF1, CDC7, KAT2B, SMAD4, SUV39H1, RB1, CDK7, CDC25C, DDIT3, CDKN1A, CCND3, JMJD6, JUN, TFAP2B, H3F3A, TFAP2A, TFAP2C, ABL1	1.61216e+16
GOTERM_BP_FAT	GO:0045597~positive regulation of cell differentiation	6	0.5719733079122974	78	229	13528	0.009795904958018305	0.08753194584800983	AKT1, JUN, MAPT, SMAD4, NFKB1, RB1	4544171985220020
SP_PIR_KEYWORDS	transcription regulation	16	1.52526e+16	78	2026	19235	0.013500320692745753	0.07949049064739733	KAT2B, SMAD4, PML, SUV39H1, NFKB1, RB1, CDK7, DDIT3, ATF2, CDKN2A, JMJD6, JUN, TFAP2B, TFAP2A, TFAP2C, MYC	1.9475e+16
SP_PIR_KEYWORDS	Transcription	16	1.52526e+16	78	2071	19235	0.016257126018755938	0.08972235102249915	KAT2B, SMAD4, PML, SUV39H1, NFKB1, RB1, CDK7, DDIT3, ATF2, CDKN2A, JMJD6, JUN, TFAP2B, TFAP2A, TFAP2C, MYC	1.90519e+16
SP_PIR_KEYWORDS	activator	7	0.667302192564347	78	520	19235	0.017867193154733497	0.09303885366015607	PML, TFAP2B, TFAP2A, NFKB1, TFAP2C, MYC, ATF2	3.31965e+16
GOTERM_BP_FAT	GO:0045944~positive regulation of transcription from RNA polymerase II promoter	7	0.667302192564347	78	371	13528	0.01893303876278924	0.14881393141591703	JUN, SMAD4, TFAP2B, NFKB1, RB1, CDK7, MYC	3.27238e+16
GOTERM_BP_FAT	GO:0006357~regulation of transcription from RNA polymerase II promoter	10	0.9532888465204957	78	727	13528	0.02189344437035745	0.16076017602827242	JUN, SMAD4, TFAP2B, TFAP2A, NFKB1, RB1, CDK7, TFAP2C, ABL1, MYC	2.38564e+16
GOTERM_CC_FAT	GO:0005667~transcription factor complex	5	0.47664442326024786	69	210	12782	0.0254756957564731	0.15409382818522055	JUN, SMAD4, RB1, CDK7, CDK4	4.41063e+16
GOTERM_CC_FAT	GO:0044451~nucleoplasm part	8	0.7626310772163966	69	555	12782	0.02760989093567438	0.15733774252585075	KAT2B, JUN, PML, SMAD4, RB1, CDK7, CDK4, MYC	2.67022e+16
SP_PIR_KEYWORDS	dna-binding	14	1334604385128690	78	1868	19235	0.03352819705915558	0.15316794097469222	PML, NFKB1, RB1, DDIT3, ATF2, TOP1, CDKN2A, JUN, TFAP2B, H3F3A, TFAP2A, TFAP2C, MYC, TERF1	1.8482e+16
GOTERM_MF_FAT	GO:0010843~promoter binding	3	0.2859866539561487	75	57	12983	0.041819097715946	0.22857514628387254	JUN, SMAD4, NFKB1	9110877192982450
GOTERM_MF_FAT	GO:0030528~transcription regulator activity	15	1.42993e+16	75	1512	12983	0.04468040940878789	0.23731599509794943	KAT2B, SMAD4, PML, NFKB1, CDH1, RB1, CDK7, DDIT3, ATF2, CDKN2A, JUN, TFAP2B, TFAP2A, TFAP2C, MYC	1.71733e+16
GOTERM_MF_FAT	GO:0003700~transcription factor activity	11	1.04862e+16	75	975	12983	0.04917257798293655	0.24794581457127118	CDKN2A, JUN, SMAD4, TFAP2B, TFAP2A, NFKB1, RB1, TFAP2C, MYC, DDIT3, ATF2	1.953e+16
GOTERM_BP_FAT	GO:0045449~regulation of transcription	22	2.09724e+16	78	2601	13528	0.05365814678518206	0.3017905976051727	KAT2B, SUV39H1, SMAD4, PML, HAT1, NFKB1, RB1, CDK7, PRDX3, DDIT3, ATF2, MAPK1, CDKN2A, JMJD6, JUN, TFAP2B, TFAP2A, TFAP2C, ABL1, CCNA2, MYC, TERF1	1.46697e+16
GOTERM_BP_FAT	GO:0045893~positive regulation of transcription, DNA-dependent	7	0.667302192564347	78	477	13528	0.05409278826775183	0.3027348212902109	JUN, SMAD4, TFAP2B, NFKB1, RB1, CDK7, MYC	2.54518e+16
GOTERM_BP_FAT	GO:0051254~positive regulation of RNA metabolic process	7	0.667302192564347	78	481	13528	0.05589790982667725	0.30901024659606846	JUN, SMAD4, TFAP2B, NFKB1, RB1, CDK7, MYC	2.52402e+16
GOTERM_MF_FAT	GO:0043565~sequence-specific DNA binding	8	0.7626310772163966	75	607	12983	0.057155865557276274	0.2774988235731024	JUN, SMAD4, TFAP2B, NFKB1, MYC, DDIT3, TERF1, ATF2	2281471718835800
GOTERM_BP_FAT	GO:0051252~regulation of RNA metabolic process	16	1.52526e+16	78	1813	13528	0.0850141834103421	0.40654410829259935	KAT2B, SMAD4, HAT1, NFKB1, RB1, CDK7, DDIT3, ATF2, CDKN2A, JMJD6, JUN, TFAP2B, TFAP2A, TFAP2C, ABL1, MYC	1.5306e+16
GOTERM_BP_FAT	GO:0006355~regulation of transcription, DNA-dependent	15	1.42993e+16	78	1773	13528	0.12610405115110543	0.5136103985032654	KAT2B, SMAD4, HAT1, NFKB1, RB1, CDK7, DDIT3, ATF2, CDKN2A, JUN, TFAP2B, TFAP2A, TFAP2C, ABL1, MYC	1467308776953440
GOTERM_BP_FAT	GO:0006366~transcription from RNA polymerase II promoter	4	0.3813155386081983	78	234	13528	0.14845800483977134	0.5568087637973285	NFKB1, CDK7, MYC, DDIT3	2964716195485420
GOTERM_BP_FAT	GO:0006350~transcription	16	1.52526e+16	78	2101	13528	0.207477112437703	0.6694663276660966	KAT2B, SMAD4, PML, SUV39H1, NFKB1, RB1, CDK7, DDIT3, ATF2, CDKN2A, JMJD6, JUN, TFAP2B, TFAP2A, TFAP2C, MYC	1.32079e+16
GOTERM_MF_FAT	GO:0003677~DNA binding	16	1.52526e+16	75	2331	12983	0.34600696544104476	0.7955781976485341	SMAD4, PML, NFKB1, RB1, DDIT3, ATF2, TOP1, CDKN2A, JUN, TFAP2B, H3F3A, TFAP2A, TFAP2C, ABL1, MYC, TERF1	1.18821e+16
GOTERM_BP_FAT	GO:0007568~aging	7	0.667302192564347	78	110	13528	3.73882e+11	9.91699e+11	PRKCA, CDKN2A, JUN, PML, NOS3, DDIT3, TERF1	1.10368e+16
KEGG_PATHWAY	hsa04730:Long-term depression	6	0.5719733079122974	55	69	5085	7.50808e+11	0.0034573682567892172	PRKCA, MAPK1, NOS1, PRKCG, PLA2G5, PRKCB	8039525691699600
GOTERM_BP_FAT	GO:0042326~negative regulation of phosphorylation	4	0.3813155386081983	78	45	13528	0.002118745854370812	0.02653869341991466	PRKCA, CDKN1A, CDKN2A, JUN	1.54165e+16
GOTERM_BP_FAT	GO:0045936~negative regulation of phosphate metabolic process	4	0.3813155386081983	78	48	13528	0.0025511506767506922	0.030544720900093303	PRKCA, CDKN1A, CDKN2A, JUN	1.4453e+16
GOTERM_BP_FAT	GO:0010563~negative regulation of phosphorus metabolic process	4	0.3813155386081983	78	48	13528	0.0025511506767506922	0.030544720900093303	PRKCA, CDKN1A, CDKN2A, JUN	1.4453e+16
GOTERM_BP_FAT	GO:0032269~negative regulation of cellular protein metabolic process	6	0.5719733079122974	78	180	13528	0.0035984214403517348	0.03955456649810829	PRKCA, CDKN2A, JUN, PML, NFKB1, PRKCG	5781196581196580
GOTERM_BP_FAT	GO:0051248~negative regulation of protein metabolic process	6	0.5719733079122974	78	187	13528	0.004231996146395221	0.04466587353206675	PRKCA, CDKN2A, JUN, PML, NFKB1, PRKCG	5564788153023440
GOTERM_BP_FAT	GO:0007611~learning or memory	4	0.3813155386081983	78	111	13528	0.02536502125465575	0.1778522399294179	PRKCA, JUN, TH, PRKCG	624994224994225
GOTERM_BP_FAT	GO:0031400~negative regulation of protein modification process	4	0.3813155386081983	78	119	13528	0.030324579954014122	0.2043855620664864	PRKCA, CDKN2A, JUN, PRKCG	5829778065072180
GOTERM_BP_FAT	GO:0007610~behavior	5	0.47664442326024786	78	469	13528	0.27764424292524076	0.7722649996470494	PRKCA, MAPK1, JUN, TH, PRKCG	1.849e+16
GOTERM_BP_FAT	GO:0048584~positive regulation of response to stimulus	3	0.2859866539561487	78	236	13528	0.38981959043398284	0.881428317060849	PRKCA, MAPK1, PRKCG	2.20469e+16
GOTERM_BP_FAT	GO:0050890~cognition	6	0.5719733079122974	78	909	13528	0.59696027321665	0.9747396594419913	PRKCA, MAPK1, JUN, TH, PRKCG, MYC	1.14479e+16
KEGG_PATHWAY	hsa04370:VEGF signaling pathway	8	0.7626310772163966	55	75	5085	1.16323e+11	8.04542e+10	PRKCA, AKT1, MAPK1, PTK2, NOS3, PRKCG, PLA2G5, PRKCB	9861818181818180
KEGG_PATHWAY	hsa04062:Chemokine signaling pathway	7	0.667302192564347	55	187	5085	0.013594954849319659	0.028003466417540812	AKT1, MAPK1, PTK2, PTK2B, NFKB1, PAK1, PRKCB	3460865337870680
BIOCARTA	h_edg1Pathway:Phospholipids as signalling intermediaries	4	0.3813155386081983	45	23	1437	0.030931358262109066	0.17277842105690666	PRKCA, AKT1, MAPK1, PTK2	5553623188405790
BIOCARTA	h_tffPathway:Trefoil Factors Initiate Mucosal Healing	3	0.2859866539561487	45	22	1437	0.1439292804404808	0.4691439206729354	AKT1, MAPK1, PTK2	4.35455e+16
BIOCARTA	h_ptenPathway:PTEN dependent cell cycle arrest and apoptosis	3	0.2859866539561487	45	22	1437	0.1439292804404808	0.4691439206729354	AKT1, MAPK1, PTK2	4.35455e+16
BIOCARTA	h_At1rPathway:Angiotensin II mediated activation of JNK Pathway via Pyk2 dependent signaling	8	0.7626310772163966	45	27	1437	8.69125e+09	7.08089e+11	PRKCA, MAPK1, PTK2, PTK2B, JUN, MAPK8, PAK1, ATF2	946172839506173
KEGG_PATHWAY	hsa04510:Focal adhesion	11	1.04862e+16	55	201	5085	3.88916e+10	2.48282e+12	PRKCA, AKT1, MAPK1, PTK2, CCND3, JUN, PRKCG, MAPK8, PAK1, PRKCB, VCL	5059701492537310
KEGG_PATHWAY	hsa04912:GnRH signaling pathway	8	0.7626310772163966	55	98	5085	6.72131e+10	3.98411e+12	PRKCA, MAPK1, PTK2B, JUN, MAPK8, PLA2G5, CALM1, PRKCB	7547309833024110
GOTERM_BP_FAT	GO:0008633~activation of pro-apoptotic gene products	4	0.3813155386081983	78	22	13528	2.52591e+12	0.00469037985628773	AKT1, MAPK8, FADD, MYC	3153379953379950
KEGG_PATHWAY	hsa04620:Toll-like receptor signaling pathway	7	0.667302192564347	55	101	5085	6.31564e+11	0.0030797392438137727	AKT1, MAPK1, TBK1, JUN, NFKB1, MAPK8, FADD	6407740774077400
BIOCARTA	h_pyk2Pathway:Links between Pyk2 and Map Kinases	6	0.5719733079122974	45	26	1437	8.70325e+11	0.020070815695210964	PRKCA, MAPK1, PTK2B, JUN, MAPK8, PAK1	7369230769230760
BIOCARTA	h_biopeptidesPathway:Bioactive Peptide Induced Signaling Pathway	6	0.5719733079122974	45	30	1437	0.00172047123146651	0.02767759093496358	PRKCA, MAPK1, PTK2B, MAPT, MAPK8, PRKCB	6386666666666660
KEGG_PATHWAY	hsa05210:Colorectal cancer	6	0.5719733079122974	55	84	5085	0.0018286011721106291	0.007207842461221192	AKT1, MAPK1, JUN, SMAD4, MAPK8, MYC	6603896103896100
KEGG_PATHWAY	hsa04722:Neurotrophin signaling pathway	7	0.667302192564347	55	124	5085	0.00184632077579183	0.006947854373659967	AKT1, MAPK1, JUN, NFKB1, MAPK8, ABL1, CALM1	5219208211143690
GOTERM_BP_FAT	GO:0001932~regulation of protein amino acid phosphorylation	6	0.5719733079122974	78	173	13528	0.0030361698550717396	0.03425900116580005	PRKCA, CCND3, PTK2B, JUN, SMAD4, PAK1	6015117830146730
BIOCARTA	h_metPathway:Signaling of Hepatocyte Growth Factor Receptor	6	0.5719733079122974	45	34	1437	0.003065596486252724	0.04084728902161017	MAPK1, PTK2, PTK2B, JUN, MAPK8, PAK1	5635294117647050
GOTERM_BP_FAT	GO:0032269~negative regulation of cellular protein metabolic process	6	0.5719733079122974	78	180	13528	0.0035984214403517348	0.03955456649810829	PRKCA, CDKN2A, JUN, PML, NFKB1, PRKCG	5781196581196580
KEGG_PATHWAY	hsa04621:NOD-like receptor signaling pathway	5	0.47664442326024786	55	62	5085	0.0040184367711831245	0.011078252090567786	CASP5, MAPK1, HSP90AA1, NFKB1, MAPK8	7.45601e+16
GOTERM_BP_FAT	GO:0051248~negative regulation of protein metabolic process	6	0.5719733079122974	78	187	13528	0.004231996146395221	0.04466587353206675	PRKCA, CDKN2A, JUN, PML, NFKB1, PRKCG	5564788153023440
BIOCARTA	h_cxcr4Pathway:CXCR4 Signaling Pathway	5	0.47664442326024786	45	23	1437	0.004430753060725138	0.05415660350688156	PRKCA, MAPK1, PTK2, PTK2B, NFKB1	6942028985507240
BIOCARTA	h_cdMacPathway:Cadmium induces DNA synthesis and proliferation in macrophages	4	0.3813155386081983	45	13	1437	0.006184900276914624	0.061248360951532854	PRKCA, MAPK1, JUN, NFKB1	9825641025641020
BIOCARTA	h_Ccr5Pathway:Pertussis toxin-insensitive CCR5 Signaling in Macrophage	4	0.3813155386081983	45	14	1437	0.007704505667170416	0.07147563689180736	PRKCA, PTK2B, JUN, MAPK8	9123809523809520
BIOCARTA	h_agrPathway:Agrin in Postsynaptic Differentiation	5	0.47664442326024786	45	27	1437	0.00802959621133889	0.06682593810461013	MAPK1, PTK2, JUN, MAPK8, PAK1	591358024691358
BIOCARTA	h_tnfr1Pathway:TNFR1 Signaling Pathway	5	0.47664442326024786	45	30	1437	0.011725931409612301	0.0874874064524428	JUN, MAPK8, FADD, RB1, PAK1	5322222222222220
KEGG_PATHWAY	hsa04650:Natural killer cell mediated cytotoxicity	6	0.5719733079122974	55	133	5085	0.012867705490136935	0.027891808486334324	PRKCA, MAPK1, PTK2B, PRKCG, PAK1, PRKCB	4170881749829110
BIOCARTA	h_tcrPathway:T Cell Receptor Signaling Pathway	5	0.47664442326024786	45	34	1437	0.01815054854259858	0.12174108862592137	PRKCA, JUN, NFKB1, MAPK8, PRKCB	4696078431372540
BIOCARTA	h_integrinPathway:Integrin Signaling Pathway	5	0.47664442326024786	45	34	1437	0.01815054854259858	0.12174108862592137	MAPK1, PTK2, JUN, MAPK8, VCL	4696078431372540
BIOCARTA	h_arenrf2Pathway:Oxidative Stress Induced Gene Expression Via Nrf2	4	0.3813155386081983	45	19	1437	0.018428820866068157	0.11867610354459157	PRKCA, MAPK1, JUN, MAPK8	672280701754386
GOTERM_BP_FAT	GO:0000165~MAPKKK cascade	5	0.47664442326024786	78	184	13528	0.020767483768546185	0.15625495270500933	PRKCA, MAPK1, PTK2B, MAPK8, PAK1	4712931995540690
GOTERM_BP_FAT	GO:0040012~regulation of locomotion	5	0.47664442326024786	78	192	13528	0.02383782422273405	0.17045912621460013	PRKCA, AKT1, MAPK1, PTK2B, VCL	4516559829059820
BIOCARTA	h_ceramidePathway:Ceramide Signaling Pathway	4	0.3813155386081983	45	21	1437	0.024238625547111873	0.14784142395053257	MAPK1, NFKB1, MAPK8, FADD	6082539682539680
BIOCARTA	h_keratinocytePathway:Keratinocyte Differentiation	5	0.47664442326024786	45	38	1437	0.026430987501891722	0.1545879700615087	PRKCA, MAPK1, JUN, NFKB1, MAPK8	4201754385964910
KEGG_PATHWAY	hsa05120:Epithelial cell signaling in Helicobacter pylori infection	4	0.3813155386081983	55	68	5085	0.03494002982480716	0.06488764155890336	JUN, NFKB1, MAPK8, PAK1	5438502673796790
BIOCARTA	h_fcer1Pathway:Fc Epsilon Receptor I Signaling in Mast Cells	4	0.3813155386081983	45	30	1437	0.061147662443105835	0.28234652356861034	MAPK1, JUN, MAPK8, PRKCB	4257777777777770
BIOCARTA	h_cardiacegfPathway:Role of EGF Receptor Transactivation by GPCRs in Cardiac Hypertrophy	3	0.2859866539561487	45	14	1437	0.06604046814896411	0.2939124571190901	PRKCA, JUN, NFKB1	6.84286e+16
BIOCARTA	h_mapkPathway:MAPKinase Signaling Pathway	6	0.5719733079122974	45	80	1437	0.09317173494628714	0.37429433895769193	MAPK1, JUN, NFKB1, MAPK8, PAK1, ATF2	2395
GOTERM_BP_FAT	GO:0040017~positive regulation of locomotion	3	0.2859866539561487	78	98	13528	0.10728454655640253	0.46889288565591924	PRKCA, MAPK1, PTK2B	5309262166405020
BIOCARTA	h_gleevecpathway:Inhibition of Cellular Proliferation by Gleevec	3	0.2859866539561487	45	19	1437	0.11277883302579687	0.4097181535932659	AKT1, JUN, MAPK8	5042105263157890
KEGG_PATHWAY	hsa04920:Adipocytokine signaling pathway	3	0.2859866539561487	55	67	5085	0.1585657384893756	0.24495291127325347	AKT1, NFKB1, MAPK8	4.13976e+16
KEGG_PATHWAY	hsa04910:Insulin signaling pathway	4	0.3813155386081983	55	135	5085	0.17200285175787597	0.2601197761246582	AKT1, MAPK1, MAPK8, CALM1	2.73939e+16
BIOCARTA	h_pdgfPathway:PDGF Signaling Pathway	3	0.2859866539561487	45	25	1437	0.17666041216807332	0.5297096039117389	PRKCA, JUN, MAPK8	3832
BIOCARTA	h_bcrPathway:BCR Signaling Pathway	3	0.2859866539561487	45	26	1437	0.18783121410740833	0.5455392115202415	PRKCA, JUN, MAPK8	3.68462e+16
BIOCARTA	h_egfPathway:EGF Signaling Pathway	3	0.2859866539561487	45	26	1437	0.18783121410740833	0.5455392115202415	PRKCA, JUN, MAPK8	3.68462e+16
GOTERM_BP_FAT	GO:0043405~regulation of MAP kinase activity	3	0.2859866539561487	78	141	13528	0.1915346972920311	0.6402763321066436	PRKCA, PTK2B, PAK1	369012547735952
BBID	3.T_cell_receptor	3	0.2859866539561487	20	16	358	0.2055402251065078	0.8739197050805373	PTK2, JUN, MAPK8	3.35625e+16
BIOCARTA	h_nfatPathway:NFAT and Hypertrophy of the heart (Transcription in the broken heart)	3	0.2859866539561487	45	37	1437	0.3142179604743353	0.7449474464748693	AKT1, MAPK1, MAPK8	2589189189189180
KEGG_PATHWAY	hsa04670:Leukocyte transendothelial migration	8	0.7626310772163966	55	118	5085	2.17585e+08	0.001203375903992332	PRKCA, PTK2, EZR, PTK2B, PRKCG, CTNNA1, PRKCB, VCL	6268104776579350
UP_SEQ_FEATURE	domain:FERM	3	0.2859866539561487	78	48	19113	0.016031979288442223	0.20962294887212962	PTK2, EZR, PTK2B	1.53149e+16
INTERPRO	IPR000299:FERM domain	3	0.2859866539561487	76	47	16659	0.01897028688890014	0.1527360970795102	PTK2, EZR, PTK2B	1.39913e+16
INTERPRO	IPR019748:FERM central domain	3	0.2859866539561487	76	47	16659	0.01897028688890014	0.1527360970795102	PTK2, EZR, PTK2B	1.39913e+16
INTERPRO	IPR019749:Band 4.1 domain	3	0.2859866539561487	76	50	16659	0.021312267266890176	0.16433052365167744	PTK2, EZR, PTK2B	1.31518e+16
INTERPRO	IPR019747:FERM conserved site	3	0.2859866539561487	76	50	16659	0.021312267266890176	0.16433052365167744	PTK2, EZR, PTK2B	1.31518e+16
SMART	SM00295:B41	3	0.2859866539561487	51	50	9079	0.030781463536568163	0.2373566290284681	PTK2, EZR, PTK2B	1.06812e+16
GOTERM_BP_FAT	GO:0006461~protein complex assembly	11	1.04862e+16	78	505	13528	5.57916e+11	0.00894532500569567	PTK2, HSP90AA1, PTK2B, PML, SMAD4, GJA1, CDH1, FADD, CDK7, MYC, TERF1	3.77781e+16
GOTERM_BP_FAT	GO:0070271~protein complex biogenesis	11	1.04862e+16	78	505	13528	5.57916e+11	0.00894532500569567	PTK2, HSP90AA1, PTK2B, PML, SMAD4, GJA1, CDH1, FADD, CDK7, MYC, TERF1	3.77781e+16
GOTERM_BP_FAT	GO:0065003~macromolecular complex assembly	12	1.14395e+16	78	665	13528	0.0012910150036308113	0.017985507976986392	PTK2, HSP90AA1, PTK2B, PML, SMAD4, H3F3A, GJA1, CDH1, FADD, CDK7, MYC, TERF1	3.12967e+16
GOTERM_BP_FAT	GO:0043933~macromolecular complex subunit organization	12	1.14395e+16	78	710	13528	0.0021714908226727224	0.02695573071447488	PTK2, HSP90AA1, PTK2B, PML, SMAD4, H3F3A, GJA1, CDH1, FADD, CDK7, MYC, TERF1	2.93131e+16
GOTERM_BP_FAT	GO:0007167~enzyme linked receptor protein signaling pathway	6	0.5719733079122974	78	342	13528	0.045231567725118445	0.267580109868902	AKT1, PTK2, PTK2B, JUN, PML, SMAD4	3042735042735040
GOTERM_BP_FAT	GO:0043623~cellular protein complex assembly	4	0.3813155386081983	78	162	13528	0.06491778059864202	0.3405713673109896	PTK2, HSP90AA1, PTK2B, SMAD4	4282367837923390
GOTERM_BP_FAT	GO:0051259~protein oligomerization	4	0.3813155386081983	78	174	13528	0.07681649356824329	0.3795016185477387	GJA1, CDH1, FADD, TERF1	3.98703e+16
GOTERM_BP_FAT	GO:0034622~cellular macromolecular complex assembly	5	0.47664442326024786	78	318	13528	0.1074585680854007	0.46816484776506695	PTK2, HSP90AA1, PTK2B, SMAD4, H3F3A	2.72698e+16
GOTERM_BP_FAT	GO:0034621~cellular macromolecular complex subunit organization	5	0.47664442326024786	78	357	13528	0.14577660931241004	0.5522467012588661	PTK2, HSP90AA1, PTK2B, SMAD4, H3F3A	2429074193780070
GOTERM_BP_FAT	GO:0045786~negative regulation of cell cycle	6	0.5719733079122974	78	81	13528	9.57815e+10	0.0022850761151608223	CDKN1A, CDKN2A, PML, CDK6, RB1, TERF1	1.28471e+16
GOTERM_BP_FAT	GO:0030099~myeloid cell differentiation	4	0.3813155386081983	78	93	13528	0.01595197314031478	0.12961187919765826	JMJD6, PML, RB1, PRDX3	7459608491866550
GOTERM_BP_FAT	GO:0030097~hemopoiesis	5	0.47664442326024786	78	236	13528	0.0455050931906246	0.26791950597194336	JMJD6, PML, CDK6, RB1, PRDX3	3674489352455450
GOTERM_BP_FAT	GO:0048534~hemopoietic or lymphoid organ development	5	0.47664442326024786	78	260	13528	0.06079243773882855	0.32461451030713495	JMJD6, PML, CDK6, RB1, PRDX3	3.33531e+16
GOTERM_BP_FAT	GO:0002520~immune system development	5	0.47664442326024786	78	276	13528	0.07232644538597216	0.36609758701972384	JMJD6, PML, CDK6, RB1, PRDX3	3141954663693790
GOTERM_BP_FAT	GO:0000060~protein import into nucleus, translocation	4	0.3813155386081983	78	34	13528	9.34491e+11	0.014151583935882783	AKT1, MAPK1, JUN, PML	2.04042e+16
GOTERM_BP_FAT	GO:0006606~protein import into nucleus	5	0.47664442326024786	78	86	13528	0.0014473919691153402	0.019759998843199456	AKT1, MAPK1, JUN, PML, NUTF2	1.00835e+16
GOTERM_BP_FAT	GO:0051170~nuclear import	5	0.47664442326024786	78	88	13528	0.001575838287800488	0.021094680738941274	AKT1, MAPK1, JUN, PML, NUTF2	9854312354312350
KEGG_PATHWAY	hsa05210:Colorectal cancer	6	0.5719733079122974	55	84	5085	0.0018286011721106291	0.007207842461221192	AKT1, MAPK1, JUN, SMAD4, MAPK8, MYC	6603896103896100
GOTERM_BP_FAT	GO:0034504~protein localization in nucleus	5	0.47664442326024786	78	94	13528	0.002008544434485211	0.025396397031929974	AKT1, MAPK1, JUN, PML, NUTF2	9225313693398790
KEGG_PATHWAY	hsa05221:Acute myeloid leukemia	5	0.47664442326024786	55	58	5085	0.0031533433136481594	0.008998613555952883	AKT1, MAPK1, PML, NFKB1, MYC	7970219435736670
KEGG_PATHWAY	hsa04660:T cell receptor signaling pathway	6	0.5719733079122974	55	108	5085	0.00544833318134486	0.014520896281017937	AKT1, MAPK1, JUN, NFKB1, PAK1, CDK4	5136363636363630
GOTERM_BP_FAT	GO:0017038~protein import	5	0.47664442326024786	78	131	13528	0.006590282443444438	0.06368144244087237	AKT1, MAPK1, JUN, PML, NUTF2	6619690741828140
BIOCARTA	h_hcmvPathway:Human Cytomegalovirus and Map Kinase Pathways	4	0.3813155386081983	45	14	1437	0.007704505667170416	0.07147563689180736	AKT1, MAPK1, NFKB1, RB1	9123809523809520
KEGG_PATHWAY	hsa04662:B cell receptor signaling pathway	5	0.47664442326024786	55	75	5085	0.007910626895726528	0.018657826907345076	AKT1, MAPK1, JUN, NFKB1, PRKCB	6163636363636360
GOTERM_BP_FAT	GO:0033365~protein localization in organelle	5	0.47664442326024786	78	146	13528	0.009585732801230212	0.086805767662823	AKT1, MAPK1, JUN, PML, NUTF2	5939585528626620
GOTERM_BP_FAT	GO:0006913~nucleocytoplasmic transport	5	0.47664442326024786	78	156	13528	0.01200754307421752	0.1043994898132139	AKT1, MAPK1, JUN, PML, NUTF2	5558842866535170
GOTERM_BP_FAT	GO:0046907~intracellular transport	10	0.9532888465204957	78	657	13528	0.012037457428326615	0.10340119693285976	MYO5A, AKT1, MAPK1, KRT18, HSP90AA1, AP1B1, JUN, PML, NUTF2, BCL2L1	2639815790500720
GOTERM_BP_FAT	GO:0051169~nuclear transport	5	0.47664442326024786	78	158	13528	0.012534821814637652	0.10682660385859089	AKT1, MAPK1, JUN, PML, NUTF2	5488477766958770
GOTERM_BP_FAT	GO:0006886~intracellular protein transport	7	0.667302192564347	78	374	13528	0.019614717133173414	0.15133260720466324	AKT1, MAPK1, KRT18, AP1B1, JUN, PML, NUTF2	3246126422597010
GOTERM_BP_FAT	GO:0034613~cellular protein localization	7	0.667302192564347	78	411	13528	0.0294426579617787	0.1999222738035915	AKT1, MAPK1, KRT18, AP1B1, JUN, PML, NUTF2	2.9539e+16
GOTERM_BP_FAT	GO:0070727~cellular macromolecule localization	7	0.667302192564347	78	414	13528	0.030359592926472702	0.20365975802968617	AKT1, MAPK1, KRT18, AP1B1, JUN, PML, NUTF2	2932491019447540
GOTERM_BP_FAT	GO:0006605~protein targeting	5	0.47664442326024786	78	215	13528	0.034141337147516965	0.22131356477501007	AKT1, MAPK1, JUN, PML, NUTF2	4033392963625520
KEGG_PATHWAY	hsa05211:Renal cell carcinoma	4	0.3813155386081983	55	70	5085	0.03760597378737073	0.0668254739755818	AKT1, MAPK1, JUN, PAK1	5283116883116880
GOTERM_BP_FAT	GO:0008104~protein localization	9	0.8579599618684461	78	882	13528	0.12776393593284016	0.5159160756375187	AKT1, MAPK1, EZR, KRT18, AP1B1, JUN, PML, NUTF2, PRKCB	1.76975e+16
GOTERM_BP_FAT	GO:0015031~protein transport	8	0.7626310772163966	78	762	13528	0.1421713923680561	0.5450834564390871	AKT1, MAPK1, KRT18, AP1B1, JUN, PML, NUTF2, PRKCB	1820849316912300
GOTERM_BP_FAT	GO:0045184~establishment of protein localization	8	0.7626310772163966	78	769	13528	0.1470221434864923	0.5542862330330528	AKT1, MAPK1, KRT18, AP1B1, JUN, PML, NUTF2, PRKCB	1.80427e+16
SP_PIR_KEYWORDS	transport	3	0.2859866539561487	78	1670	19235	0.9924432785953309	0.9999994611850661	AKT1, AP1B1, NUTF2	0.44299861814831876
KEGG_PATHWAY	hsa05215:Prostate cancer	6	0.5719733079122974	55	89	5085	0.0023619932654829067	0.00782035407524495	AKT1, MAPK1, CDKN1A, HSP90AA1, NFKB1, RB1	6232890704800810
BIOCARTA	h_gcrPathway:Corticosteroids and cardioprotection	4	0.3813155386081983	45	14	1437	0.007704505667170416	0.07147563689180736	AKT1, HSP90AA1, NOS3, NFKB1	9123809523809520
BIOCARTA	h_aktPathway:AKT Signaling Pathway	3	0.2859866539561487	45	22	1437	0.1439292804404808	0.4691439206729354	AKT1, HSP90AA1, NFKB1	4.35455e+16
GOTERM_BP_FAT	GO:0032386~regulation of intracellular transport	4	0.3813155386081983	78	71	13528	0.007678728668141147	0.07191846889209041	CDKN2A, SMAD4, CDH1, CALM1	9771036475261820
SP_PIR_KEYWORDS	calcium binding	4	0.3813155386081983	78	103	19235	0.008188954497483478	0.052044143865391024	PRKCA, CDH1, CALM1, PRKCB	957679860592482
GOTERM_BP_FAT	GO:0060341~regulation of cellular localization	6	0.5719733079122974	78	248	13528	0.013477587043038922	0.11245203547270943	PRKCA, CDKN2A, SMAD4, CDH1, NOS2, CALM1	4196029776674930
GOTERM_BP_FAT	GO:0046822~regulation of nucleocytoplasmic transport	3	0.2859866539561487	78	58	13528	0.043063228101845125	0.2594559545595808	CDKN2A, SMAD4, CDH1	897082228116711
GOTERM_BP_FAT	GO:0032496~response to lipopolysaccharide	4	0.3813155386081983	78	77	13528	0.00959194064363783	0.0863172588883866	MAPK1, JUN, NOS3, PRDX3	9009657009657000
GOTERM_BP_FAT	GO:0002237~response to molecule of bacterial origin	4	0.3813155386081983	78	86	13528	0.012940532533849924	0.10882537790802782	MAPK1, JUN, NOS3, PRDX3	8066785927251040
GOTERM_BP_FAT	GO:0009617~response to bacterium	5	0.47664442326024786	78	193	13528	0.024239990541096632	0.17225726221162074	MAPK1, JUN, NOS3, NOS2, PRDX3	4493157964660550
KEGG_PATHWAY	hsa04620:Toll-like receptor signaling pathway	7	0.667302192564347	55	101	5085	6.31564e+11	0.0030797392438137727	AKT1, MAPK1, TBK1, JUN, NFKB1, MAPK8, FADD	6407740774077400
BIOCARTA	h_pcafpathway:The information-processing pathway at the IFN-beta enhancer	4	0.3813155386081983	45	8	1437	0.0013486899678942551	0.027123474310684625	KAT2B, JUN, NFKB1, ATF2	1.59667e+16
KEGG_PATHWAY	hsa04722:Neurotrophin signaling pathway	7	0.667302192564347	55	124	5085	0.00184632077579183	0.006947854373659967	AKT1, MAPK1, JUN, NFKB1, MAPK8, ABL1, CALM1	5219208211143690
BIOCARTA	h_atmPathway:ATM Signaling Pathway	5	0.47664442326024786	45	20	1437	0.0025929231975231736	0.03774164764772936	CDKN1A, JUN, NFKB1, MAPK8, ABL1	7.98333e+16
BIOCARTA	h_41bbPathway:The 4-1BB-dependent immune response	4	0.3813155386081983	45	17	1437	0.013497109442492378	0.09577975083517509	JUN, NFKB1, MAPK8, ATF2	7513725490196070
BIOCARTA	h_tcrPathway:T Cell Receptor Signaling Pathway	5	0.47664442326024786	45	34	1437	0.01815054854259858	0.12174108862592137	PRKCA, JUN, NFKB1, MAPK8, PRKCB	4696078431372540
BIOCARTA	h_keratinocytePathway:Keratinocyte Differentiation	5	0.47664442326024786	45	38	1437	0.026430987501891722	0.1545879700615087	PRKCA, MAPK1, JUN, NFKB1, MAPK8	4201754385964910
KEGG_PATHWAY	hsa05120:Epithelial cell signaling in Helicobacter pylori infection	4	0.3813155386081983	55	68	5085	0.03494002982480716	0.06488764155890336	JUN, NFKB1, MAPK8, PAK1	5438502673796790
BBID	77.IkBa_Kinase_JNK_MEKK1	3	0.2859866539561487	20	7	358	0.04783427843521529	0.4840360900469797	JUN, NFKB1, MAPK8	7671428571428570
BIOCARTA	h_mapkPathway:MAPKinase Signaling Pathway	6	0.5719733079122974	45	80	1437	0.09317173494628714	0.37429433895769193	MAPK1, JUN, NFKB1, MAPK8, PAK1, ATF2	2395
BIOCARTA	h_stressPathway:TNF/Stress Related Signaling	3	0.2859866539561487	45	24	1437	0.16560767826600536	0.5131457187306161	JUN, NFKB1, MAPK8	3991666666666660
BIOCARTA	h_il1rPathway:Signal transduction through IL1R	3	0.2859866539561487	45	29	1437	0.22188595909011707	0.6052112440266244	JUN, NFKB1, MAPK8	3.30345e+16
BIOCARTA	h_tollPathway:Toll-Like Receptor Pathway	3	0.2859866539561487	45	37	1437	0.3142179604743353	0.7449474464748693	JUN, NFKB1, MAPK8	2589189189189180
GOTERM_BP_FAT	GO:0051130~positive regulation of cellular component organization	6	0.5719733079122974	78	181	13528	0.0036844531643745035	0.04017512580312799	PRKCA, AKT1, MAPT, PML, SMAD4, TERF1	5749256268593280
GOTERM_BP_FAT	GO:0033043~regulation of organelle organization	5	0.47664442326024786	78	217	13528	0.03514260190094356	0.2251240639584432	MAPT, PML, CDC25C, MYC, TERF1	3.99622e+16
GOTERM_BP_FAT	GO:0010638~positive regulation of organelle organization	3	0.2859866539561487	78	83	13528	0.0810301760671712	0.39495579577697804	MAPT, PML, TERF1	6.26877e+16
GOTERM_CC_FAT	GO:0005912~adherens junction	7	0.667302192564347	69	155	12782	1.69956e+12	0.002594750856236394	PTK2, PTK2B, GJA1, CDH1, PAK1, CTNNA1, VCL	8365965404394570
GOTERM_CC_FAT	GO:0070161~anchoring junction	7	0.667302192564347	69	172	12782	2.9862e+11	0.004251884084538138	PTK2, PTK2B, GJA1, CDH1, PAK1, CTNNA1, VCL	7539096730704410
GOTERM_BP_FAT	GO:0034329~cell junction assembly	4	0.3813155386081983	78	41	13528	0.0016178346294293275	0.021451016606055973	PTK2B, GJA1, CTNNA1, VCL	1692057535959970
GOTERM_CC_FAT	GO:0005925~focal adhesion	5	0.47664442326024786	69	102	12782	0.0021048397109405684	0.02229326960986222	PTK2, PTK2B, CDH1, PAK1, VCL	9080704745666380
GOTERM_CC_FAT	GO:0005924~cell-substrate adherens junction	5	0.47664442326024786	69	106	12782	0.0024217615385975044	0.024406070360996734	PTK2, PTK2B, CDH1, PAK1, VCL	8738036642056330
GOTERM_CC_FAT	GO:0030055~cell-substrate junction	5	0.47664442326024786	69	112	12782	0.002956564202723966	0.028391083423789043	PTK2, PTK2B, CDH1, PAK1, VCL	8269927536231880
BIOCARTA	h_metPathway:Signaling of Hepatocyte Growth Factor Receptor	6	0.5719733079122974	45	34	1437	0.003065596486252724	0.04084728902161017	MAPK1, PTK2, PTK2B, JUN, MAPK8, PAK1	5635294117647050
GOTERM_BP_FAT	GO:0034330~cell junction organization	4	0.3813155386081983	78	57	13528	0.004160724293155666	0.04425420355716769	PTK2B, GJA1, CTNNA1, VCL	1217094017094010
GOTERM_BP_FAT	GO:0007043~cell-cell junction assembly	3	0.2859866539561487	78	18	13528	0.0046121769522289545	0.04754254445451522	GJA1, CTNNA1, VCL	2.8906e+16
BIOCARTA	h_agrPathway:Agrin in Postsynaptic Differentiation	5	0.47664442326024786	45	27	1437	0.00802959621133889	0.06682593810461013	MAPK1, PTK2, JUN, MAPK8, PAK1	591358024691358
GOTERM_MF_FAT	GO:0050839~cell adhesion molecule binding	3	0.2859866539561487	75	30	12983	0.012575599891027796	0.09443982758266467	EZR, CDH1, CTNNA1	1.73107e+16
GOTERM_CC_FAT	GO:0015629~actin cytoskeleton	6	0.5719733079122974	69	269	12782	0.014117325427568715	0.0996020660509348	MYO5A, EZR, CDH1, CTNNA1, DAPK1, VCL	4131889445611760
GOTERM_CC_FAT	GO:0005913~cell-cell adherens junction	3	0.2859866539561487	69	35	12782	0.014818647448128771	0.10102260446514189	GJA1, CDH1, VCL	1.58783e+16
GOTERM_BP_FAT	GO:0045216~cell-cell junction organization	3	0.2859866539561487	78	35	13528	0.016852376104089697	0.134953291629349	GJA1, CTNNA1, VCL	1.48659e+16
GOTERM_BP_FAT	GO:0030030~cell projection organization	7	0.667302192564347	78	368	13528	0.01826784065112194	0.14472362487751778	PRKCA, AKT1, PTK2, PTK2B, GJA1, CDH1, VCL	3299052396878480
SP_PIR_KEYWORDS	cell junction	6	0.5719733079122974	78	399	19235	0.02190376355694441	0.11016728598132897	PTK2, GJA1, CDH1, PAK1, CTNNA1, VCL	3708309234625020
GOTERM_CC_FAT	GO:0016323~basolateral plasma membrane	5	0.47664442326024786	69	203	12782	0.0228403266693696	0.1431702846201025	PTK2, PTK2B, CDH1, PAK1, VCL	456271864067966
GOTERM_BP_FAT	GO:0030182~neuron differentiation	7	0.667302192564347	78	438	13528	0.038377507651452675	0.23932682864758226	PRKCA, PTK2, PTK2B, TH, SMAD4, GJA1, CDH1	2771806580025750
BIOCARTA	h_cell2cellPathway:Cell to Cell Adhesion Signaling	3	0.2859866539561487	45	11	1437	0.042293759704560986	0.21564498144413236	PTK2, CTNNA1, VCL	8709090909090900
GOTERM_BP_FAT	GO:0048666~neuron development	6	0.5719733079122974	78	339	13528	0.04383403125509158	0.261388596310675	PRKCA, PTK2, PTK2B, TH, GJA1, CDH1	3.06966e+16
GOTERM_CC_FAT	GO:0030054~cell junction	7	0.667302192564347	69	518	12782	0.056917921589036614	0.26913059555523045	PTK2, PTK2B, GJA1, CDH1, PAK1, CTNNA1, VCL	2.50333e+16
GOTERM_BP_FAT	GO:0031175~neuron projection development	5	0.47664442326024786	78	256	13528	0.05807537801998969	0.31570401411241567	PRKCA, PTK2, PTK2B, GJA1, CDH1	3.38742e+16
GOTERM_BP_FAT	GO:0006928~cell motion	6	0.5719733079122974	78	475	13528	0.13357618311309752	0.5262833151085851	PRKCA, PTK2, PTK2B, NOS3, MAPK8, VCL	2190769230769230
KEGG_PATHWAY	hsa04360:Axon guidance	4	0.3813155386081983	55	129	5085	0.15647659724149404	0.2460869757230869	MAPK1, PTK2, PAK1, ABL1	2.86681e+16
KEGG_PATHWAY	hsa04810:Regulation of actin cytoskeleton	5	0.47664442326024786	55	215	5085	0.1932088034055282	0.2855292667444641	MAPK1, PTK2, EZR, PAK1, VCL	2.15011e+16
GOTERM_BP_FAT	GO:0007155~cell adhesion	7	0.667302192564347	78	700	13528	0.20765121570919443	0.6685981324304746	EZR, PTK2B, ACAN, CDH1, ABL1, CTNNA1, VCL	1.73436e+16
GOTERM_BP_FAT	GO:0022610~biological adhesion	7	0.667302192564347	78	701	13528	0.20855083707498212	0.6679642493681559	EZR, PTK2B, ACAN, CDH1, ABL1, CTNNA1, VCL	1.73188e+16
SP_PIR_KEYWORDS	cell adhesion	4	0.3813155386081983	78	422	19235	0.23885562090303034	0.6200322000105227	CDH1, ABL1, CTNNA1, VCL	2.33747e+16
SP_PIR_KEYWORDS	cell membrane	12	1.14395e+16	78	2194	19235	0.2593772218489992	0.635601703024945	PRKCA, AKT1, PTK2, EZR, NOS1, PTK2B, MAPT, GJA1, NOS3, CDH1, CTNNA1, VCL	1.34878e+16
GOTERM_CC_FAT	GO:0005911~cell-cell junction	3	0.2859866539561487	69	190	12782	0.2682310053255932	0.6840729272377672	GJA1, CDH1, VCL	2924942791762010
GOTERM_CC_FAT	GO:0044459~plasma membrane part	14	1334604385128690	69	2203	12782	0.3883703426924083	0.8268287557020024	AP1B1, TH, GJA1, CDH1, FADD, BCL2L1, CTNNA1, VCL, PTK2, EZR, PTK2B, MAPT, NOS3, PAK1	1.17724e+16
GOTERM_BP_FAT	GO:0016337~cell-cell adhesion	3	0.2859866539561487	78	276	13528	0.46807860625881775	0.9278953301147691	EZR, ACAN, CDH1	1.88517e+16
GOTERM_BP_FAT	GO:0051098~regulation of binding	5	0.47664442326024786	78	153	13528	0.011243770453687562	0.09926059046265046	CDKN2A, SMAD4, PRDX3, DDIT3, CALM1	5667839785486840
GOTERM_BP_FAT	GO:0051101~regulation of DNA binding	4	0.3813155386081983	78	121	13528	0.03163878482712874	0.21042626468938996	CDKN2A, PRDX3, DDIT3, CALM1	5733418097054460
GOTERM_BP_FAT	GO:0051090~regulation of transcription factor activity	3	0.2859866539561487	78	103	13528	0.1164861832122917	0.48814596742805894	CDKN2A, PRDX3, DDIT3	5051530993278560
SP_PIR_KEYWORDS	DNA binding	9	0.8579599618684461	78	340	19235	6.39469e+10	6.23308e+11	TOP1, JUN, PML, H3F3A, TFAP2A, NFKB1, RB1, TERF1, ATF2	6527714932126690
GOTERM_CC_FAT	GO:0000228~nuclear chromosome	5	0.47664442326024786	69	162	12782	0.010800444746192033	0.08550155459797404	TOP1, JUN, SUV39H1, H3F3A, TERF1	5717480765789940
GOTERM_BP_FAT	GO:0016568~chromatin modification	6	0.5719733079122974	78	274	13528	0.019891339486563398	0.1517021182417535	KAT2B, JMJD6, SUV39H1, HAT1, RB1, TERF1	3.79787e+16
GOTERM_BP_FAT	GO:0006325~chromatin organization	7	0.667302192564347	78	378	13528	0.020549561522337313	0.15554051103493427	KAT2B, JMJD6, SUV39H1, H3F3A, HAT1, RB1, TERF1	3211775878442540
GOTERM_BP_FAT	GO:0016570~histone modification	4	0.3813155386081983	78	122	13528	0.03230698825920375	0.21249423025394598	KAT2B, JMJD6, SUV39H1, HAT1	5686422866750730
GOTERM_BP_FAT	GO:0016569~covalent chromatin modification	4	0.3813155386081983	78	126	13528	0.03505355548231179	0.2255997199357942	KAT2B, JMJD6, SUV39H1, HAT1	5505901505901500
GOTERM_CC_FAT	GO:0016585~chromatin remodeling complex	3	0.2859866539561487	69	71	12782	0.05479536297135879	0.26598335094528447	KAT2B, SUV39H1, RB1	7827311696264540
GOTERM_BP_FAT	GO:0051276~chromosome organization	7	0.667302192564347	78	485	13528	0.057739443237022785	0.3153036002747841	KAT2B, JMJD6, SUV39H1, H3F3A, HAT1, RB1, TERF1	2.5032e+16
GOTERM_CC_FAT	GO:0000785~chromatin	4	0.3813155386081983	69	200	12782	0.09049540661242023	0.3695625583645751	JUN, SUV39H1, H3F3A, RB1	3.70493e+16
GOTERM_CC_FAT	GO:0005694~chromosome	6	0.5719733079122974	69	460	12782	0.09762674165558352	0.38646876946360587	TOP1, JUN, SUV39H1, H3F3A, RB1, TERF1	2416257088846880
SP_PIR_KEYWORDS	chromosomal protein	3	0.2859866539561487	78	145	19235	0.11470904872949808	0.39041120221586045	SUV39H1, H3F3A, TERF1	5.10212e+16
GOTERM_CC_FAT	GO:0044454~nuclear chromosome part	3	0.2859866539561487	69	122	12782	0.137393728086473	0.48979756255021234	JUN, H3F3A, TERF1	4555238774055590
GOTERM_CC_FAT	GO:0044427~chromosomal part	5	0.47664442326024786	69	386	12782	0.14945298108647634	0.5140722436806773	JUN, SUV39H1, H3F3A, RB1, TERF1	2.39956e+16
SP_PIR_KEYWORDS	chromatin regulator	3	0.2859866539561487	78	213	19235	0.20983049339944213	0.5727751406329296	JMJD6, SUV39H1, RB1	3.47328e+16
UP_SEQ_FEATURE	domain:Leucine-zipper	4	0.3813155386081983	78	110	19113	0.009965934860672496	0.15126715138149083	JUN, MYC, DDIT3, ATF2	891048951048951
INTERPRO	IPR004827:Basic-leucine zipper (bZIP) transcription factor	3	0.2859866539561487	76	53	16659	0.02376796373613868	0.17576445669594531	JUN, DDIT3, ATF2	1.24074e+16
SMART	SM00338:BRLZ	3	0.2859866539561487	51	53	9079	0.03426769512615019	0.2281954138941481	JUN, DDIT3, ATF2	1.00766e+16
GOTERM_MF_FAT	GO:0043565~sequence-specific DNA binding	8	0.7626310772163966	75	607	12983	0.057155865557276274	0.2774988235731024	JUN, SMAD4, TFAP2B, NFKB1, MYC, DDIT3, TERF1, ATF2	2281471718835800
UP_SEQ_FEATURE	DNA-binding region:Basic motif	3	0.2859866539561487	78	161	19113	0.1373994718661679	0.8008152399250438	JUN, MYC, ATF2	4565934065934060
GOTERM_BP_FAT	GO:0014070~response to organic cyclic substance	6	0.5719733079122974	78	121	13528	6.22809e+11	0.009870557240557298	PRKCA, CDKN1A, PTK2B, JUN, NOS3, BCL2L1	8600127145581690
GOTERM_BP_FAT	GO:0001568~blood vessel development	7	0.667302192564347	78	245	13528	0.0026924070416950753	0.031944381253391385	AKT1, PTK2, JMJD6, PTK2B, JUN, NOS3, NOS2	4.95531e+16
GOTERM_BP_FAT	GO:0001944~vasculature development	7	0.667302192564347	78	251	13528	0.003035291325869555	0.034520625707077035	AKT1, PTK2, JMJD6, PTK2B, JUN, NOS3, NOS2	4836857697415460
GOTERM_BP_FAT	GO:0045471~response to ethanol	4	0.3813155386081983	78	64	13528	0.005758581239625818	0.056615158155630785	PRKCA, PTK2B, TH, NOS3	1.08397e+16
GOTERM_BP_FAT	GO:0043542~endothelial cell migration	3	0.2859866539561487	78	22	13528	0.006861822573405207	0.06578387372389904	PTK2, PTK2B, NOS3	2365034965034960
GOTERM_CC_FAT	GO:0045121~membrane raft	5	0.47664442326024786	69	143	12782	0.007032487339333951	0.06098880299143605	PRKCA, PTK2B, GJA1, NOS3, FADD	6477146042363430
GOTERM_BP_FAT	GO:0048514~blood vessel morphogenesis	5	0.47664442326024786	78	211	13528	0.032189726097175936	0.21275634738275395	PTK2, PTK2B, JUN, NOS3, NOS2	4109855389476240
GOTERM_BP_FAT	GO:0030182~neuron differentiation	7	0.667302192564347	78	438	13528	0.038377507651452675	0.23932682864758226	PRKCA, PTK2, PTK2B, TH, SMAD4, GJA1, CDH1	2771806580025750
GOTERM_BP_FAT	GO:0048666~neuron development	6	0.5719733079122974	78	339	13528	0.04383403125509158	0.261388596310675	PRKCA, PTK2, PTK2B, TH, GJA1, CDH1	3.06966e+16
GOTERM_BP_FAT	GO:0007167~enzyme linked receptor protein signaling pathway	6	0.5719733079122974	78	342	13528	0.045231567725118445	0.267580109868902	AKT1, PTK2, PTK2B, JUN, PML, SMAD4	3042735042735040
GOTERM_BP_FAT	GO:0001525~angiogenesis	4	0.3813155386081983	78	148	13528	0.05223033531386921	0.29715697265744034	PTK2, PTK2B, JUN, NOS3	4687456687456680
GOTERM_BP_FAT	GO:0031175~neuron projection development	5	0.47664442326024786	78	256	13528	0.05807537801998969	0.31570401411241567	PRKCA, PTK2, PTK2B, GJA1, CDH1	3.38742e+16
BIOCARTA	h_achPathway:Role of nicotinic acetylcholine receptors in the regulation of apoptosis	3	0.2859866539561487	45	14	1437	0.06604046814896411	0.2939124571190901	AKT1, PTK2, PTK2B	6.84286e+16
BIOCARTA	h_vegfPathway:VEGF, Hypoxia, and Angiogenesis	3	0.2859866539561487	45	15	1437	0.07475034048675988	0.318698127064334	PRKCA, PTK2, NOS3	6386666666666660
GOTERM_BP_FAT	GO:0006928~cell motion	6	0.5719733079122974	78	475	13528	0.13357618311309752	0.5262833151085851	PRKCA, PTK2, PTK2B, NOS3, MAPK8, VCL	2190769230769230
GOTERM_BP_FAT	GO:0016477~cell migration	4	0.3813155386081983	78	276	13528	0.20768206262043734	0.6674492168016486	PRKCA, PTK2, PTK2B, NOS3	2513563730955030
GOTERM_BP_FAT	GO:0051674~localization of cell	4	0.3813155386081983	78	307	13528	0.25434093791844103	0.7402329062877366	PRKCA, PTK2, PTK2B, NOS3	2259751106656640
GOTERM_BP_FAT	GO:0048870~cell motility	4	0.3813155386081983	78	307	13528	0.25434093791844103	0.7402329062877366	PRKCA, PTK2, PTK2B, NOS3	2259751106656640
GOTERM_BP_FAT	GO:0007169~transmembrane receptor protein tyrosine kinase signaling pathway	3	0.2859866539561487	78	224	13528	0.36536858516306003	0.8611759014673505	AKT1, PTK2, PTK2B	2.3228e+16
GOTERM_BP_FAT	GO:0007166~cell surface receptor linked signal transduction	11	1.04862e+16	78	1856	13528	0.6245343864806137	0.9806123385613029	AKT1, MAPK1, PTK2, JMJD6, PTK2B, JUN, PML, SMAD4, NOS3, NOS2, CALM1	1.02791e+16
GOTERM_BP_FAT	GO:0010243~response to organic nitrogen	6	0.5719733079122974	78	63	13528	2.84552e+10	7.99227e+11	CASP6, CDKN1A, PTK2B, NOS3, BCL2L1, DDIT3	1651770451770450
GOTERM_BP_FAT	GO:0010038~response to metal ion	6	0.5719733079122974	78	129	13528	8.32421e+11	0.012887501205666285	CASP6, PTK2B, NOS3, MAPK8, BCL2L1, CALM1	8066785927251040
GOTERM_BP_FAT	GO:0043434~response to peptide hormone stimulus	6	0.5719733079122974	78	154	13528	0.001831442714469259	0.023597693642024686	PRKCA, AKT1, KAT2B, NOS3, BCL2L1, CCNA2	6757242757242750
GOTERM_BP_FAT	GO:0007281~germ cell development	3	0.2859866539561487	78	101	13528	0.11278131344603094	0.479001625321116	AKT1, PTK2B, BCL2L1	5151561309977150
GOTERM_BP_FAT	GO:0003006~reproductive developmental process	4	0.3813155386081983	78	262	13528	0.18732491775958357	0.6336565357649743	AKT1, PTK2B, NOS3, BCL2L1	2.64788e+16
GOTERM_BP_FAT	GO:0048610~reproductive cellular process	3	0.2859866539561487	78	162	13528	0.23533564217335257	0.715361778363079	AKT1, PTK2B, BCL2L1	3.21178e+16
GOTERM_BP_FAT	GO:0007276~gamete generation	4	0.3813155386081983	78	395	13528	0.39134747178110785	0.8819472095096854	AKT1, PTK2B, NOS3, BCL2L1	1.75631e+16
GOTERM_BP_FAT	GO:0019953~sexual reproduction	4	0.3813155386081983	78	458	13528	0.48633455799155617	0.9366497431451222	AKT1, PTK2B, NOS3, BCL2L1	151472399507334
GOTERM_BP_FAT	GO:0048609~reproductive process in a multicellular organism	4	0.3813155386081983	78	487	13528	0.5277513810329051	0.9548738517731571	AKT1, PTK2B, NOS3, BCL2L1	1.42452e+16
GOTERM_BP_FAT	GO:0032504~multicellular organism reproduction	4	0.3813155386081983	78	487	13528	0.5277513810329051	0.9548738517731571	AKT1, PTK2B, NOS3, BCL2L1	1.42452e+16
GOTERM_MF_FAT	GO:0004857~enzyme inhibitor activity	7	0.667302192564347	75	270	12983	0.004347616758660922	0.04698639186620346	CDKN1A, CDKN2A, SNCB, CSTA, PRDX3, BCL2L1, TERF1	4487950617283950
GOTERM_MF_FAT	GO:0004869~cysteine-type endopeptidase inhibitor activity	3	0.2859866539561487	75	37	12983	0.018767053856001987	0.13021303138440654	CSTA, PRDX3, BCL2L1	1.40357e+16
GOTERM_MF_FAT	GO:0004866~endopeptidase inhibitor activity	3	0.2859866539561487	75	145	12983	0.20019978745962955	0.6206770888633901	CSTA, PRDX3, BCL2L1	3.58152e+16
GOTERM_MF_FAT	GO:0030414~peptidase inhibitor activity	3	0.2859866539561487	75	153	12983	0.21688295644622058	0.6473317560543961	CSTA, PRDX3, BCL2L1	3394248366013070
KEGG_PATHWAY	hsa04730:Long-term depression	6	0.5719733079122974	55	69	5085	7.50808e+11	0.0034573682567892172	PRKCA, MAPK1, NOS1, PRKCG, PLA2G5, PRKCB	8039525691699600
GOTERM_CC_FAT	GO:0030425~dendrite	3	0.2859866539561487	69	163	12782	0.21506378743105106	0.6379931827186962	MAPK1, NOS1, PRKCG	3409442518004800
GOTERM_BP_FAT	GO:0050877~neurological system process	8	0.7626310772163966	78	1210	13528	0.5400292158149511	0.9591506466205649	PRKCA, MAPK1, PTK2, NOS1, JUN, TH, PRKCG, MYC	1146683619410890
SP_PIR_KEYWORDS	cell division	8	0.7626310772163966	78	264	19235	8.98565e+10	8.34072e+11	CDC7, CCND3, CDK6, CDK7, CDK4, CDC25C, CCNA2, TERF1	7472804972804970
GOTERM_BP_FAT	GO:0007346~regulation of mitotic cell cycle	7	0.667302192564347	78	152	13528	2.2407e+11	0.0043301737363616866	CDKN2A, PML, RB1, CDC25C, CCNA2, MYC, TERF1	7987179487179480
SP_PIR_KEYWORDS	mitosis	3	0.2859866539561487	78	183	19235	0.16655049891763288	0.49499306621799777	CDC25C, CCNA2, TERF1	4042664985287930
GOTERM_BP_FAT	GO:0000279~M phase	4	0.3813155386081983	78	329	13528	0.28833886217793697	0.7851177560526688	RB1, CDC25C, CCNA2, TERF1	2.10864e+16
GOTERM_BP_FAT	GO:0000280~nuclear division	3	0.2859866539561487	78	220	13528	0.3571376001652243	0.8540398039509013	CDC25C, CCNA2, TERF1	2365034965034960
GOTERM_BP_FAT	GO:0007067~mitosis	3	0.2859866539561487	78	220	13528	0.3571376001652243	0.8540398039509013	CDC25C, CCNA2, TERF1	2365034965034960
GOTERM_BP_FAT	GO:0000087~M phase of mitotic cell cycle	3	0.2859866539561487	78	224	13528	0.36536858516306003	0.8611759014673505	CDC25C, CCNA2, TERF1	2.3228e+16
GOTERM_BP_FAT	GO:0048285~organelle fission	3	0.2859866539561487	78	229	13528	0.3756025777841865	0.8698366564470901	CDC25C, CCNA2, TERF1	2.27209e+16
GOTERM_CC_FAT	GO:0044451~nucleoplasm part	8	0.7626310772163966	69	555	12782	0.02760989093567438	0.15733774252585075	KAT2B, JUN, PML, SMAD4, RB1, CDK7, CDK4, MYC	2.67022e+16
GOTERM_MF_FAT	GO:0046332~SMAD binding	3	0.2859866539561487	75	46	12983	0.028223909709157058	0.17140894567383236	JUN, PML, SMAD4	1.12896e+16
GOTERM_BP_FAT	GO:0007167~enzyme linked receptor protein signaling pathway	6	0.5719733079122974	78	342	13528	0.045231567725118445	0.267580109868902	AKT1, PTK2, PTK2B, JUN, PML, SMAD4	3042735042735040
GOTERM_BP_FAT	GO:0007179~transforming growth factor beta receptor signaling pathway	3	0.2859866539561487	78	60	13528	0.045779061797531446	0.2682582552831375	JUN, PML, SMAD4	8671794871794870
GOTERM_BP_FAT	GO:0007178~transmembrane receptor protein serine/threonine kinase signaling pathway	3	0.2859866539561487	78	103	13528	0.1164861832122917	0.48814596742805894	JUN, PML, SMAD4	5051530993278560
GOTERM_CC_FAT	GO:0015629~actin cytoskeleton	6	0.5719733079122974	69	269	12782	0.014117325427568715	0.0996020660509348	MYO5A, EZR, CDH1, CTNNA1, DAPK1, VCL	4131889445611760
GOTERM_MF_FAT	GO:0008092~cytoskeletal protein binding	8	0.7626310772163966	75	504	12983	0.024434547211404166	0.1578124703101048	MYO5A, EZR, MAPT, NOS3, CTNNA1, TERF1, CALM1, VCL	2.74772e+16
GOTERM_MF_FAT	GO:0003779~actin binding	4	0.3813155386081983	75	326	12983	0.284352695753766	0.7248601863594717	MYO5A, EZR, NOS3, VCL	2.12401e+16
KEGG_PATHWAY	hsa04062:Chemokine signaling pathway	7	0.667302192564347	55	187	5085	0.013594954849319659	0.028003466417540812	AKT1, MAPK1, PTK2, PTK2B, NFKB1, PAK1, PRKCB	3460865337870680
GOTERM_BP_FAT	GO:0010627~regulation of protein kinase cascade	6	0.5719733079122974	78	249	13528	0.01369398112031006	0.11350710761272931	AKT1, TBK1, PTK2B, GJA1, FADD, PAK1	4179178251467400
GOTERM_BP_FAT	GO:0080135~regulation of cellular response to stress	4	0.3813155386081983	78	103	13528	0.020883039250018547	0.15625119811291344	AKT1, PTK2B, PRKCG, PAK1	6735374657704750
GOTERM_BP_FAT	GO:0046328~regulation of JNK cascade	3	0.2859866539561487	78	65	13528	0.05283466260380412	0.2989563662539373	AKT1, PTK2B, PAK1	8004733727810650
GOTERM_BP_FAT	GO:0070302~regulation of stress-activated protein kinase signaling pathway	3	0.2859866539561487	78	69	13528	0.058738904491264635	0.317601878635555	AKT1, PTK2B, PAK1	7540691192865100
GOTERM_BP_FAT	GO:0043408~regulation of MAPKKK cascade	3	0.2859866539561487	78	109	13528	0.1277816563408445	0.5146705343512384	AKT1, PTK2B, PAK1	4773465067043040
GOTERM_BP_FAT	GO:0045860~positive regulation of protein kinase activity	4	0.3813155386081983	78	223	13528	0.13400395651790709	0.5262155721933428	AKT1, CCND3, PTK2B, PAK1	3.11096e+16
GOTERM_BP_FAT	GO:0033674~positive regulation of kinase activity	4	0.3813155386081983	78	231	13528	0.14446572173143163	0.5500121685477327	AKT1, CCND3, PTK2B, PAK1	3003219003219000
GOTERM_BP_FAT	GO:0051347~positive regulation of transferase activity	4	0.3813155386081983	78	240	13528	0.15654989929194726	0.5738903483614708	AKT1, CCND3, PTK2B, PAK1	2.8906e+16
GOTERM_BP_FAT	GO:0022604~regulation of cell morphogenesis	4	0.3813155386081983	78	131	13528	0.03865175922170792	0.2398258794873115	PTK2, EZR, MAPT, SMAD4	5295752593462510
GOTERM_BP_FAT	GO:0010769~regulation of cell morphogenesis involved in differentiation	3	0.2859866539561487	78	77	13528	0.07118533443684305	0.36379103962942905	PTK2, MAPT, SMAD4	6757242757242750
GOTERM_BP_FAT	GO:0060284~regulation of cell development	4	0.3813155386081983	78	205	13528	0.11153047804262409	0.47627644653248136	CASP6, PTK2, MAPT, SMAD4	338411507191995
GOTERM_BP_FAT	GO:0051052~regulation of DNA metabolic process	4	0.3813155386081983	78	114	13528	0.027168995681245135	0.18847955722909415	JUN, PRKCG, MYC, TERF1	6085470085470080
GOTERM_MF_FAT	GO:0043565~sequence-specific DNA binding	8	0.7626310772163966	75	607	12983	0.057155865557276274	0.2774988235731024	JUN, SMAD4, TFAP2B, NFKB1, MYC, DDIT3, TERF1, ATF2	2281471718835800
GOTERM_MF_FAT	GO:0003690~double-stranded DNA binding	3	0.2859866539561487	75	97	12983	0.105689857466967	0.412706313077027	JUN, MYC, TERF1	5353814432989690
GOTERM_MF_FAT	GO:0043566~structure-specific DNA binding	3	0.2859866539561487	75	145	12983	0.20019978745962955	0.6206770888633901	JUN, MYC, TERF1	3.58152e+16
KEGG_PATHWAY	hsa04210:Apoptosis	7	0.667302192564347	55	87	5085	2.81961e+11	0.0014618101151254725	AKT1, CASP10, CASP6, CASP7, NFKB1, FADD, BCL2L1	7438871473354230
GOTERM_BP_FAT	GO:0006952~defense response	5	0.47664442326024786	78	615	13528	0.46627121223589874	0.9274247546126635	AKT1, CASP6, TBK1, NFKB1, NOS2	1.41005e+16
GOTERM_BP_FAT	GO:0006954~inflammatory response	3	0.2859866539561487	78	325	13528	0.5555366904060209	0.9641896788398425	AKT1, CASP6, NFKB1	1.60095e+16
GOTERM_BP_FAT	GO:0009611~response to wounding	4	0.3813155386081983	78	530	13528	0.5857079702833743	0.9720449773196258	INA, AKT1, CASP6, NFKB1	1.30895e+16
SP_PIR_KEYWORDS	cytoskeleton	8	0.7626310772163966	78	636	19235	0.013638505224143194	0.07794074290931108	EZR, MAPT, NOS3, ABL1, CTNNA1, TERF1, CALM1, VCL	3101919045315270
SP_PIR_KEYWORDS	myristate	3	0.2859866539561487	78	119	19235	0.0823268833145632	0.31084849881875576	NOS3, ABL1, VCL	6216871363930180
SP_PIR_KEYWORDS	lipoprotein	3	0.2859866539561487	78	642	19235	0.7326080242086044	0.9831388258945465	NOS3, ABL1, VCL	1.15235e+16
GOTERM_BP_FAT	GO:0007423~sensory organ development	5	0.47664442326024786	78	229	13528	0.041508013588652866	0.2532842833224992	CASP6, JMJD6, TH, KRT13, MYC	378680998768335
GOTERM_BP_FAT	GO:0043010~camera-type eye development	3	0.2859866539561487	78	107	13528	0.12398749889600787	0.5085827107073895	CASP6, JMJD6, TH	4862688713156000
GOTERM_BP_FAT	GO:0001654~eye development	3	0.2859866539561487	78	132	13528	0.17312924191682633	0.6104023191527612	CASP6, JMJD6, TH	3941724941724940
GOTERM_BP_FAT	GO:0051050~positive regulation of transport	5	0.47664442326024786	78	223	13528	0.038248530715486714	0.23963015841031177	PRKCA, AKT1, SMAD4, CDH1, CALM1	3.8887e+16
GOTERM_BP_FAT	GO:0070201~regulation of establishment of protein localization	3	0.2859866539561487	78	121	13528	0.15108683032983386	0.5624173472882068	AKT1, SMAD4, CDH1	4300063572790840
GOTERM_BP_FAT	GO:0032880~regulation of protein localization	3	0.2859866539561487	78	138	13528	0.18536803287884723	0.6306110355203609	AKT1, SMAD4, CDH1	3770345596432550
GOTERM_BP_FAT	GO:0010605~negative regulation of macromolecule metabolic process	12	1.14395e+16	78	734	13528	0.0028122095528429958	0.032537360592260534	PRKCA, CDKN2A, JUN, PML, SMAD4, HAT1, NFKB1, PRKCG, RB1, BCL2L1, MYC, TERF1	2835464263257170
GOTERM_MF_FAT	GO:0042803~protein homodimerization activity	6	0.5719733079122974	75	334	12983	0.04168242364403758	0.23301005217764748	HSP90AA1, PML, SMAD4, NFKB1, NOS2, TERF1	3.1097e+16
GOTERM_BP_FAT	GO:0010629~negative regulation of gene expression	7	0.667302192564347	78	504	13528	0.06698576349770122	0.34835937171565934	PML, SMAD4, HAT1, NFKB1, RB1, BCL2L1, MYC	2408831908831900
GOTERM_BP_FAT	GO:0010558~negative regulation of macromolecule biosynthetic process	7	0.667302192564347	78	547	13528	0.09095560239891087	0.42236115900767024	PRKCA, PML, SMAD4, HAT1, NFKB1, RB1, TERF1	2219472179252800
GOTERM_BP_FAT	GO:0031327~negative regulation of cellular biosynthetic process	7	0.667302192564347	78	561	13528	0.09966025021453956	0.4482319526739781	PRKCA, PML, SMAD4, HAT1, NFKB1, RB1, TERF1	2164084281731340
GOTERM_BP_FAT	GO:0009890~negative regulation of biosynthetic process	7	0.667302192564347	78	573	13528	0.10746576697521334	0.466890484519655	PRKCA, PML, SMAD4, HAT1, NFKB1, RB1, TERF1	2.11876e+16
GOTERM_BP_FAT	GO:0045934~negative regulation of nucleobase, nucleoside, nucleotide and nucleic acid metabolic process	6	0.5719733079122974	78	512	13528	0.1665482103191645	0.5973258292672159	PML, SMAD4, HAT1, NFKB1, RB1, TERF1	2032451923076920
GOTERM_BP_FAT	GO:0051172~negative regulation of nitrogen compound metabolic process	6	0.5719733079122974	78	519	13528	0.17313063240480278	0.6091371252260795	PML, SMAD4, HAT1, NFKB1, RB1, TERF1	2.00504e+16
GOTERM_BP_FAT	GO:0016481~negative regulation of transcription	5	0.47664442326024786	78	459	13528	0.2649765507950431	0.7546197935247827	PML, SMAD4, HAT1, NFKB1, RB1	1.88928e+16
GOTERM_MF_FAT	GO:0016564~transcription repressor activity	4	0.3813155386081983	75	316	12983	0.2688309696358191	0.7127233229892516	PML, NFKB1, RB1, DDIT3	2.19122e+16
GOTERM_BP_FAT	GO:0045892~negative regulation of transcription, DNA-dependent	4	0.3813155386081983	78	356	13528	0.33052515534593974	0.8304684180805599	SMAD4, HAT1, NFKB1, RB1	1.94872e+16
GOTERM_BP_FAT	GO:0051253~negative regulation of RNA metabolic process	4	0.3813155386081983	78	362	13528	0.33991826340731013	0.8389336981779631	SMAD4, HAT1, NFKB1, RB1	1.91642e+16
GOTERM_MF_FAT	GO:0004715~non-membrane spanning protein tyrosine kinase activity	3	0.2859866539561487	75	41	12983	0.022771820980726526	0.1517952652865594	PTK2, PTK2B, ABL1	1.26663e+16
INTERPRO	IPR008266:Tyrosine protein kinase, active site	3	0.2859866539561487	76	97	16659	0.07082561750702801	0.42359305105466805	PTK2, PTK2B, ABL1	677930005425936
SP_PIR_KEYWORDS	tyrosine-protein kinase	3	0.2859866539561487	78	111	19235	0.07304114199096115	0.29682015145898766	PTK2, PTK2B, ABL1	6664934164934160
INTERPRO	IPR001245:Tyrosine protein kinase	3	0.2859866539561487	76	118	16659	0.09896298166816109	0.5193995810630443	PTK2, PTK2B, ABL1	5572814451382690
SMART	SM00219:TyrKc	3	0.2859866539561487	51	118	9079	0.13744435032100635	0.5744091594066392	PTK2, PTK2B, ABL1	45259222333001
GOTERM_MF_FAT	GO:0004713~protein tyrosine kinase activity	3	0.2859866539561487	75	166	12983	0.24423992409415912	0.6906353619227338	PTK2, PTK2B, ABL1	3128433734939750
UP_SEQ_FEATURE	compositionally biased region:Pro-rich	5	0.47664442326024786	78	960	19113	0.5450862695772036	0.9988045697722943	PTK2, PTK2B, PML, ABL1, VCL	1276241987179480
GOTERM_BP_FAT	GO:0010627~regulation of protein kinase cascade	6	0.5719733079122974	78	249	13528	0.01369398112031006	0.11350710761272931	AKT1, TBK1, PTK2B, GJA1, FADD, PAK1	4179178251467400
GOTERM_BP_FAT	GO:0043123~positive regulation of I-kappaB kinase/NF-kappaB cascade	3	0.2859866539561487	78	97	13528	0.10546903538294052	0.4641446540623493	TBK1, GJA1, FADD	5363996827914350
GOTERM_BP_FAT	GO:0043122~regulation of I-kappaB kinase/NF-kappaB cascade	3	0.2859866539561487	78	107	13528	0.12398749889600787	0.5085827107073895	TBK1, GJA1, FADD	4862688713156000
GOTERM_BP_FAT	GO:0009967~positive regulation of signal transduction	4	0.3813155386081983	78	295	13528	0.23606412737944116	0.7154631117259673	TBK1, SMAD4, GJA1, FADD	2.35167e+16
GOTERM_BP_FAT	GO:0010740~positive regulation of protein kinase cascade	3	0.2859866539561487	78	167	13528	0.24587149963742366	0.7275399262964243	TBK1, GJA1, FADD	3115614923998150
GOTERM_BP_FAT	GO:0010647~positive regulation of cell communication	4	0.3813155386081983	78	329	13528	0.28833886217793697	0.7851177560526688	TBK1, SMAD4, GJA1, FADD	2.10864e+16
GOTERM_BP_FAT	GO:0030030~cell projection organization	7	0.667302192564347	78	368	13528	0.01826784065112194	0.14472362487751778	PRKCA, AKT1, PTK2, PTK2B, GJA1, CDH1, VCL	3299052396878480
GOTERM_BP_FAT	GO:0030182~neuron differentiation	7	0.667302192564347	78	438	13528	0.038377507651452675	0.23932682864758226	PRKCA, PTK2, PTK2B, TH, SMAD4, GJA1, CDH1	2771806580025750
GOTERM_BP_FAT	GO:0048666~neuron development	6	0.5719733079122974	78	339	13528	0.04383403125509158	0.261388596310675	PRKCA, PTK2, PTK2B, TH, GJA1, CDH1	3.06966e+16
GOTERM_BP_FAT	GO:0031175~neuron projection development	5	0.47664442326024786	78	256	13528	0.05807537801998969	0.31570401411241567	PRKCA, PTK2, PTK2B, GJA1, CDH1	3.38742e+16
GOTERM_BP_FAT	GO:0007268~synaptic transmission	5	0.47664442326024786	78	298	13528	0.08987984448522425	0.4209628731862515	PRKCA, MAPK1, PTK2, NOS1, TH	2.91e+16
GOTERM_BP_FAT	GO:0007267~cell-cell signaling	7	0.667302192564347	78	600	13528	0.12616018746284025	0.5124723079052186	PRKCA, MAPK1, PTK2, NOS1, TH, GJA1, TFAP2C	2.02342e+16
GOTERM_BP_FAT	GO:0019226~transmission of nerve impulse	5	0.47664442326024786	78	350	13528	0.13853433269160226	0.5376535060748671	PRKCA, MAPK1, PTK2, NOS1, TH	2.47766e+16
GOTERM_BP_FAT	GO:0032989~cellular component morphogenesis	5	0.47664442326024786	78	397	13528	0.1898154803778574	0.6378193789163651	PRKCA, KRT19, PTK2, EZR, GJA1	2.18433e+16
GOTERM_BP_FAT	GO:0000902~cell morphogenesis	4	0.3813155386081983	78	356	13528	0.33052515534593974	0.8304684180805599	PRKCA, PTK2, EZR, GJA1	1.94872e+16
GOTERM_BP_FAT	GO:0048812~neuron projection morphogenesis	3	0.2859866539561487	78	213	13528	0.3426480144458305	0.8409466481608451	PRKCA, PTK2, GJA1	2.44276e+16
GOTERM_BP_FAT	GO:0048858~cell projection morphogenesis	3	0.2859866539561487	78	245	13528	0.40789167302825646	0.8930161852248447	PRKCA, PTK2, GJA1	2.1237e+16
GOTERM_BP_FAT	GO:0032990~cell part morphogenesis	3	0.2859866539561487	78	256	13528	0.4296330954513466	0.9061871848699852	PRKCA, PTK2, GJA1	2032451923076920
GOTERM_CC_FAT	GO:0009898~internal side of plasma membrane	8	0.7626310772163966	69	316	12782	0.0014069935444992777	0.0166000440257984	PTK2, EZR, AP1B1, MAPT, TH, BCL2L1, CTNNA1, VCL	4689781691432760
GOTERM_CC_FAT	GO:0005886~plasma membrane	24	2.28789e+16	69	3777	12782	0.2573475861987557	0.6857766137568224	PRKCA, NOS1, AP1B1, TH, GJA1, CDH1, CYTH2, FADD, CYTH3, BCL2L1, CTNNA1, VCL, PRKCB, AKT1, KRT19, PTK2, EZR, JMJD6, PTK2B, MAPT, NOS3, PAK1, PLA2G5, CALM1	1.1771e+16
SP_PIR_KEYWORDS	cell membrane	12	1.14395e+16	78	2194	19235	0.2593772218489992	0.635601703024945	PRKCA, AKT1, PTK2, EZR, NOS1, PTK2B, MAPT, GJA1, NOS3, CDH1, CTNNA1, VCL	1.34878e+16
GOTERM_CC_FAT	GO:0044459~plasma membrane part	14	1334604385128690	69	2203	12782	0.3883703426924083	0.8268287557020024	AP1B1, TH, GJA1, CDH1, FADD, BCL2L1, CTNNA1, VCL, PTK2, EZR, PTK2B, MAPT, NOS3, PAK1	1.17724e+16
SP_PIR_KEYWORDS	membrane	16	1.52526e+16	78	6256	19235	0.996306732603025	0.9999998942713716	PRKCA, NOS1, AP1B1, GJA1, CDH1, BCL2L1, CTNNA1, VCL, PRKCB, AKT1, PTK2, EZR, PTK2B, MAPT, NOS3, ABL1	0.6306970948914683
GOTERM_CC_FAT	GO:0000267~cell fraction	11	1.04862e+16	69	1083	12782	0.05936239413506858	0.2734298253760502	PRKCA, AKT1, MAPK1, SNCB, CASP7, PML, NOS3, PRKCG, CYTH2, CYTH3, ATF2	1881542146747490
GOTERM_CC_FAT	GO:0019717~synaptosome	3	0.2859866539561487	69	85	12782	0.07511596652849574	0.32200720496852797	PRKCA, SNCB, PRKCG	6538107416879790
GOTERM_CC_FAT	GO:0005626~insoluble fraction	8	0.7626310772163966	69	839	12782	0.1570236513460864	0.5257470185539024	PRKCA, MAPK1, SNCB, PML, PRKCG, CYTH2, CYTH3, ATF2	1.76635e+16
GOTERM_CC_FAT	GO:0005624~membrane fraction	6	0.5719733079122974	69	809	12782	0.43232287625112814	0.8494167957885749	PRKCA, SNCB, PRKCG, CYTH2, CYTH3, ATF2	1.37389e+16
GOTERM_BP_FAT	GO:0048568~embryonic organ development	4	0.3813155386081983	78	172	13528	0.07477010630611693	0.37369064874949853	TH, TFAP2A, MYC, DDIT3	4033392963625520
GOTERM_BP_FAT	GO:0048562~embryonic organ morphogenesis	3	0.2859866539561487	78	133	13528	0.175159581453526	0.6125887592116991	TH, TFAP2A, MYC	3.91209e+16
GOTERM_BP_FAT	GO:0048598~embryonic morphogenesis	4	0.3813155386081983	78	307	13528	0.25434093791844103	0.7402329062877366	TH, SMAD4, TFAP2A, MYC	2259751106656640
BIOCARTA	h_cxcr4Pathway:CXCR4 Signaling Pathway	5	0.47664442326024786	45	23	1437	0.004430753060725138	0.05415660350688156	PRKCA, MAPK1, PTK2, PTK2B, NFKB1	6942028985507240
BIOCARTA	h_edg1Pathway:Phospholipids as signalling intermediaries	4	0.3813155386081983	45	23	1437	0.030931358262109066	0.17277842105690666	PRKCA, AKT1, MAPK1, PTK2	5553623188405790
GOTERM_BP_FAT	GO:0007268~synaptic transmission	5	0.47664442326024786	78	298	13528	0.08987984448522425	0.4209628731862515	PRKCA, MAPK1, PTK2, NOS1, TH	2.91e+16
BIOCARTA	h_sppaPathway:Aspirin Blocks Signaling Pathway Involved in Platelet Activation	3	0.2859866539561487	45	19	1437	0.11277883302579687	0.4097181535932659	PRKCA, MAPK1, PTK2	5042105263157890
GOTERM_BP_FAT	GO:0007267~cell-cell signaling	7	0.667302192564347	78	600	13528	0.12616018746284025	0.5124723079052186	PRKCA, MAPK1, PTK2, NOS1, TH, GJA1, TFAP2C	2.02342e+16
BIOCARTA	h_CCR3Pathway:CCR3 signaling in Eosinophils	3	0.2859866539561487	45	21	1437	0.1333425056353319	0.4501624317862759	PRKCA, MAPK1, PTK2	4561904761904760
GOTERM_BP_FAT	GO:0019226~transmission of nerve impulse	5	0.47664442326024786	78	350	13528	0.13853433269160226	0.5376535060748671	PRKCA, MAPK1, PTK2, NOS1, TH	2.47766e+16
GOTERM_BP_FAT	GO:0007610~behavior	5	0.47664442326024786	78	469	13528	0.27764424292524076	0.7722649996470494	PRKCA, MAPK1, JUN, TH, PRKCG	1.849e+16
GOTERM_BP_FAT	GO:0007626~locomotory behavior	3	0.2859866539561487	78	274	13528	0.46430090482888303	0.9268586836620729	PRKCA, MAPK1, TH	1.89893e+16
GOTERM_BP_FAT	GO:0050877~neurological system process	8	0.7626310772163966	78	1210	13528	0.5400292158149511	0.9591506466205649	PRKCA, MAPK1, PTK2, NOS1, JUN, TH, PRKCG, MYC	1146683619410890
GOTERM_BP_FAT	GO:0050890~cognition	6	0.5719733079122974	78	909	13528	0.59696027321665	0.9747396594419913	PRKCA, MAPK1, JUN, TH, PRKCG, MYC	1.14479e+16
GOTERM_BP_FAT	GO:0007600~sensory perception	3	0.2859866539561487	78	810	13528	0.9495836532141968	0.9999938039598522	MAPK1, TH, MYC	0.6423551756885091
GOTERM_BP_FAT	GO:0006308~DNA catabolic process	3	0.2859866539561487	78	60	13528	0.045779061797531446	0.2682582552831375	CDKN2A, CDK7, MYC	8671794871794870
GOTERM_BP_FAT	GO:0006351~transcription, DNA-dependent	5	0.47664442326024786	78	292	13528	0.0849026723048131	0.407391340228368	CDKN2A, NFKB1, CDK7, MYC, DDIT3	2969792764313310
GOTERM_BP_FAT	GO:0032774~RNA biosynthetic process	5	0.47664442326024786	78	296	13528	0.0882052406920486	0.41730819829751586	CDKN2A, NFKB1, CDK7, MYC, DDIT3	2929660429660420
GOTERM_BP_FAT	GO:0006366~transcription from RNA polymerase II promoter	4	0.3813155386081983	78	234	13528	0.14845800483977134	0.5568087637973285	NFKB1, CDK7, MYC, DDIT3	2964716195485420
GOTERM_BP_FAT	GO:0009057~macromolecule catabolic process	6	0.5719733079122974	78	781	13528	0.46022752569377545	0.9250698092922354	AKT1, CDKN2A, NFKB1, HSPA1A, CDK7, MYC	1332414064808430
GOTERM_BP_FAT	GO:0044265~cellular macromolecule catabolic process	5	0.47664442326024786	78	725	13528	0.597342048407832	0.974574002656624	CDKN2A, NFKB1, HSPA1A, CDK7, MYC	1.19611e+16
UP_SEQ_FEATURE	repeat:ANK 4	3	0.2859866539561487	78	158	19113	0.1333045379097913	0.7994005159983723	CDKN2A, NFKB1, DAPK1	4.65263e+16
UP_SEQ_FEATURE	repeat:ANK 3	3	0.2859866539561487	78	194	19113	0.1840260451708532	0.8846921052322696	CDKN2A, NFKB1, DAPK1	3.78925e+16
UP_SEQ_FEATURE	repeat:ANK 1	3	0.2859866539561487	78	231	19113	0.2385186130602515	0.9312452754829479	CDKN2A, NFKB1, DAPK1	3.18232e+16
UP_SEQ_FEATURE	repeat:ANK 2	3	0.2859866539561487	78	232	19113	0.2400084185921104	0.9279708044474122	CDKN2A, NFKB1, DAPK1	3.1686e+16
SP_PIR_KEYWORDS	ank repeat	3	0.2859866539561487	78	240	19235	0.24967032714325166	0.6322014047105717	CDKN2A, NFKB1, DAPK1	3082532051282050
INTERPRO	IPR002110:Ankyrin	3	0.2859866539561487	76	238	16659	0.290750993001188	0.8901376157611947	CDKN2A, NFKB1, DAPK1	2.76299e+16
SMART	SM00248:ANK	3	0.2859866539561487	51	238	9079	0.37870162129864715	0.8945919525308753	CDKN2A, NFKB1, DAPK1	2.24394e+16
INTERPRO	IPR011993:Pleckstrin homology-type	4	0.3813155386081983	76	303	16659	0.156145579748738	0.6748643923777833	AKT1, EZR, CYTH2, CYTH3	2893694632621150
UP_SEQ_FEATURE	domain:PH	3	0.2859866539561487	78	237	19113	0.2474644807441814	0.9256100548298414	AKT1, CYTH2, CYTH3	3101752677702040
INTERPRO	IPR001849:Pleckstrin homology	3	0.2859866539561487	76	277	16659	0.3552420070258895	0.9356231693440434	AKT1, CYTH2, CYTH3	2.37398e+16
SMART	SM00233:PH	3	0.2859866539561487	51	277	9079	0.4538327662398705	0.9272648316493083	AKT1, CYTH2, CYTH3	1928010193246970
GOTERM_BP_FAT	GO:0016044~membrane organization	5	0.47664442326024786	78	381	13528	0.17169188286646045	0.6083050453860754	HSP90AA1, AP1B1, JMJD6, CYTH2, BCL2L1	2.27606e+16
GOTERM_BP_FAT	GO:0006897~endocytosis	3	0.2859866539561487	78	220	13528	0.3571376001652243	0.8540398039509013	AP1B1, JMJD6, CYTH2	2365034965034960
GOTERM_BP_FAT	GO:0010324~membrane invagination	3	0.2859866539561487	78	220	13528	0.3571376001652243	0.8540398039509013	AP1B1, JMJD6, CYTH2	2365034965034960
GOTERM_BP_FAT	GO:0016192~vesicle-mediated transport	5	0.47664442326024786	78	576	13528	0.4163904903204333	0.8987256346008354	KRT18, AP1B1, JMJD6, CYTH2, CYTH3	1.50552e+16
GOTERM_BP_FAT	GO:0007507~heart development	4	0.3813155386081983	78	215	13528	0.123825596009739	0.5094053151801823	JMJD6, CASP7, TH, GJA1	3.22671e+16
GOTERM_CC_FAT	GO:0012505~endomembrane system	7	0.667302192564347	69	782	12782	0.23556679456818708	0.6551113261944738	AP1B1, CASP7, TH, PML, GJA1, NOS3, NUTF2	1658215649208640
GOTERM_CC_FAT	GO:0000139~Golgi membrane	3	0.2859866539561487	69	186	12782	0.2603238656845309	0.684098380025757	AP1B1, GJA1, NOS3	2.98784e+16
GOTERM_CC_FAT	GO:0044431~Golgi apparatus part	3	0.2859866539561487	69	294	12782	0.4660123831398141	0.873249749192149	AP1B1, GJA1, NOS3	1.89027e+16
GOTERM_CC_FAT	GO:0005794~Golgi apparatus	6	0.5719733079122974	69	872	12782	0.49856983478339634	0.8933514100855384	AP1B1, GJA1, NOS3, CDH1, PAK1, PLA2G5	1.27463e+16
GOTERM_CC_FAT	GO:0031090~organelle membrane	7	0.667302192564347	69	1096	12782	0.5332624700307889	0.9122982214857677	AP1B1, CASP7, TH, PML, GJA1, NOS3, BCL2L1	1183142917592290
GOTERM_CC_FAT	GO:0031410~cytoplasmic vesicle	4	0.3813155386081983	69	642	12782	0.6709294782830934	0.9665586768636798	HSP90AA1, AP1B1, TH, GJA1	1.15418e+16
GOTERM_CC_FAT	GO:0031982~vesicle	4	0.3813155386081983	69	670	12782	0.6992046733510522	0.9732413031842297	HSP90AA1, AP1B1, TH, GJA1	1.10595e+16
GOTERM_CC_FAT	GO:0016023~cytoplasmic membrane-bounded vesicle	3	0.2859866539561487	69	550	12782	0.7969144414726744	0.9906576449398645	HSP90AA1, TH, GJA1	1.01043e+16
GOTERM_CC_FAT	GO:0031988~membrane-bounded vesicle	3	0.2859866539561487	69	568	12782	0.8115686164339417	0.991986513251241	HSP90AA1, TH, GJA1	0.978413962033068
GOTERM_CC_FAT	GO:0012505~endomembrane system	7	0.667302192564347	69	782	12782	0.23556679456818708	0.6551113261944738	AP1B1, CASP7, TH, PML, GJA1, NOS3, NUTF2	1658215649208640
GOTERM_CC_FAT	GO:0031967~organelle envelope	5	0.47664442326024786	69	620	12782	0.4210737377245801	0.8484111176084786	CASP7, PML, GJA1, NUTF2, BCL2L1	1.49392e+16
GOTERM_CC_FAT	GO:0031975~envelope	5	0.47664442326024786	69	622	12782	0.4234926862333307	0.8460088571580683	CASP7, PML, GJA1, NUTF2, BCL2L1	1.48912e+16
GOTERM_CC_FAT	GO:0031090~organelle membrane	7	0.667302192564347	69	1096	12782	0.5332624700307889	0.9122982214857677	AP1B1, CASP7, TH, PML, GJA1, NOS3, BCL2L1	1183142917592290
GOTERM_CC_FAT	GO:0031966~mitochondrial membrane	3	0.2859866539561487	69	394	12782	0.6245373755234933	0.9541714184286335	CASP7, GJA1, BCL2L1	1.41051e+16
GOTERM_CC_FAT	GO:0005740~mitochondrial envelope	3	0.2859866539561487	69	419	12782	0.6581467217778019	0.9641715824280572	CASP7, GJA1, BCL2L1	1326346373352700
GOTERM_CC_FAT	GO:0044429~mitochondrial part	3	0.2859866539561487	69	595	12782	0.8318142141216281	0.9938209918090767	CASP7, GJA1, BCL2L1	0.9340153452685421
SP_PIR_KEYWORDS	calcium	8	0.7626310772163966	78	803	19235	0.04154717321224283	0.18276180895032945	PRKCA, NOS3, CDH1, PRKCG, NOS2, PLA2G5, CALM1, PRKCB	2456812593798890
GOTERM_MF_FAT	GO:0005509~calcium ion binding	8	0.7626310772163966	75	919	12983	0.26860496057	0.7182813215484128	PRKCA, NOS3, CDH1, PRKCG, NOS2, PLA2G5, CALM1, PRKCB	1.50691e+16
SP_PIR_KEYWORDS	metal-binding	14	1334604385128690	78	2972	19235	0.41092409586349454	0.8260611748672505	PRKCA, CDC7, NOS1, TH, PML, PRKCG, ATF2, PRKCB, CDKN1A, JMJD6, NOS3, NOS2, ABL1, PLA2G5	1.16165e+16
SP_PIR_KEYWORDS	zinc	8	0.7626310772163966	78	2189	19235	0.7876269790008612	0.9910925002969716	PRKCA, CDKN1A, PML, NOS3, PRKCG, NOS2, PRKCB, ATF2	0.9012428107905494
SP_PIR_KEYWORDS	zinc-finger	6	0.5719733079122974	78	1718	19235	0.8288479556428823	0.9949864393500751	PRKCA, CDKN1A, PML, PRKCG, PRKCB, ATF2	0.8612429479717024
GOTERM_MF_FAT	GO:0046914~transition metal ion binding	13	1.23928e+16	75	2785	12983	0.8962288051487749	0.999469422464947	PRKCA, CDKN1A, NOS1, JMJD6, TH, SUV39H1, PML, NOS3, PRKCG, NOS2, ABL1, PRKCB, ATF2	0.8080383004189109
GOTERM_MF_FAT	GO:0008270~zinc ion binding	9	0.8579599618684461	75	2311	12983	0.9651158367671865	0.9999836202798514	PRKCA, CDKN1A, PML, SUV39H1, NOS3, PRKCG, NOS2, PRKCB, ATF2	0.6741497187364777
GOTERM_MF_FAT	GO:0046872~metal ion binding	17	1.62059e+16	75	4140	12983	0.9814812430089841	0.9999975618392356	PRKCA, CDC7, NOS1, TH, PML, SUV39H1, CDH1, PRKCG, ATF2, PRKCB, CDKN1A, JMJD6, NOS3, NOS2, ABL1, PLA2G5, CALM1	0.7108244766505636
GOTERM_MF_FAT	GO:0043169~cation binding	17	1.62059e+16	75	4179	12983	0.9837825244886675	0.9999981091504567	PRKCA, CDC7, NOS1, TH, PML, SUV39H1, CDH1, PRKCG, ATF2, PRKCB, CDKN1A, JMJD6, NOS3, NOS2, ABL1, PLA2G5, CALM1	0.7041907952460716
GOTERM_MF_FAT	GO:0043167~ion binding	17	1.62059e+16	75	4241	12983	0.986925452259712	0.9999988630637053	PRKCA, CDC7, NOS1, TH, PML, SUV39H1, CDH1, PRKCG, ATF2, PRKCB, CDKN1A, JMJD6, NOS3, NOS2, ABL1, PLA2G5, CALM1	0.6938960936885955
GOTERM_MF_FAT	GO:0005083~small GTPase regulator activity	3	0.2859866539561487	75	274	12983	0.46509440791748285	0.8860449715294718	JUN, CYTH2, CYTH3	1.89533e+16
GOTERM_MF_FAT	GO:0030695~GTPase regulator activity	3	0.2859866539561487	75	404	12983	0.6753515208807037	0.9787286494776315	JUN, CYTH2, CYTH3	1.28545e+16
GOTERM_MF_FAT	GO:0060589~nucleoside-triphosphatase regulator activity	3	0.2859866539561487	75	413	12983	0.6871512117815318	0.9801959570145108	JUN, CYTH2, CYTH3	1.25743e+16
GOTERM_CC_FAT	GO:0031967~organelle envelope	5	0.47664442326024786	69	620	12782	0.4210737377245801	0.8484111176084786	CASP7, PML, GJA1, NUTF2, BCL2L1	1.49392e+16
GOTERM_CC_FAT	GO:0031975~envelope	5	0.47664442326024786	69	622	12782	0.4234926862333307	0.8460088571580683	CASP7, PML, GJA1, NUTF2, BCL2L1	1.48912e+16
UP_SEQ_FEATURE	transmembrane region	3	0.2859866539561487	78	4911	19113	0.999999996916128	1.0	GJA1, CDH1, BCL2L1	0.14968751468446032
SP_PIR_KEYWORDS	transmembrane	3	0.2859866539561487	78	4973	19235	0.9999999973652808	1.0	GJA1, CDH1, BCL2L1	0.1487648687528036
GOTERM_CC_FAT	GO:0016021~integral to membrane	4	0.3813155386081983	69	5297	12782	0.9999999999998324	1.0	GJA1, CDH1, NUTF2, BCL2L1	0.13988776802838904
GOTERM_CC_FAT	GO:0031224~intrinsic to membrane	4	0.3813155386081983	69	5485	12782	0.9999999999999668	1.0	GJA1, CDH1, NUTF2, BCL2L1	0.13509307333571136
UP_SEQ_FEATURE	disulfide bond	6	0.5719733079122974	78	2819	19113	0.9922827105178834	1.0	MAPT, ACAN, GJA1, CDH1, PRDX3, PLA2G5	0.5215433732638416
SP_PIR_KEYWORDS	disulfide bond	6	0.5719733079122974	78	2924	19235	0.9941704771671394	0.9999996859552125	MAPT, ACAN, GJA1, CDH1, PRDX3, PLA2G5	0.5060244133431548
SP_PIR_KEYWORDS	signal	3	0.2859866539561487	78	3250	19235	0.9999895093676636	0.9999999999999866	ACAN, CDH1, PLA2G5	0.22763313609467456
UP_SEQ_FEATURE	signal peptide	3	0.2859866539561487	78	3250	19113	0.9999904428500535	1.0	ACAN, CDH1, PLA2G5	0.22618934911242602
